# Supplementary material for: Lanthanide complexes of DOTA–nitroxide conjugates for redox imaging: spectroelectrochemistry, CEST, relaxivity, and cytotoxicity
Source: Royal Society of Chemistry journal article supplement (doi:10.1039/d1dt01628h), 2021-01-01
Supplement: d1dt01628h1.pdf [file d1dt01628h1.pdf]

Electronic supporting Information for:

**Lanthanide complexes of DOTA-nitroxide conjugates  
for redox imaging: Spectro-electrochemistry, CEST,  
relaxivity and cytotoxicity.**

D. Mouchel Dit Leguerrier, R. Barré, Q. Ruet, D. Imbert, C. Philouze, P. H. Fries, V. Frachet, J.  
K. Molloy, F. Thomas

**Content :**

|                                  |         |
|----------------------------------|---------|
| Fig. S1-S22.....                 | S2-13   |
| Details of the calculations..... | S14-102 |

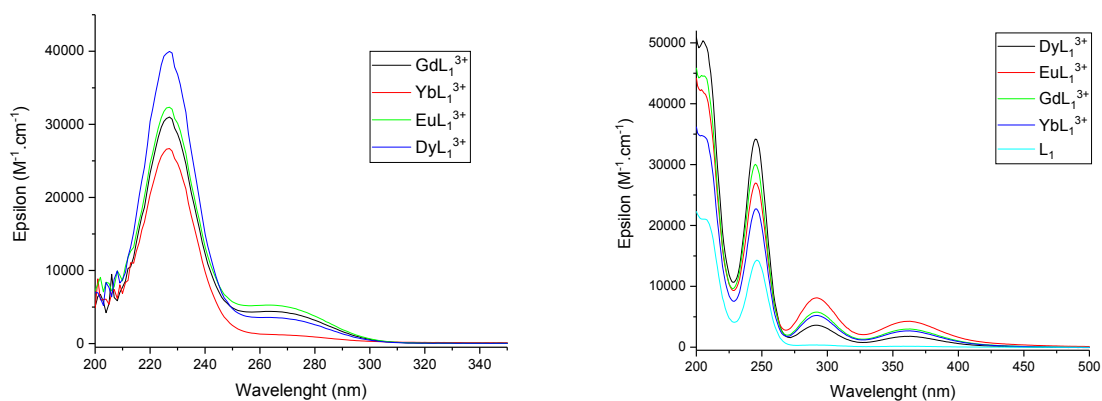

**Fig. S1** UV-Vis spectra of 0.5 mM solution of  $\text{YbL}_1^{3+}$ ,  $\text{DyL}_1^{3+}$ ,  $\text{EuL}_1^{3+}$  and  $\text{GdL}_1^{3+}$  (Left : in Water, Right : in MeCN)

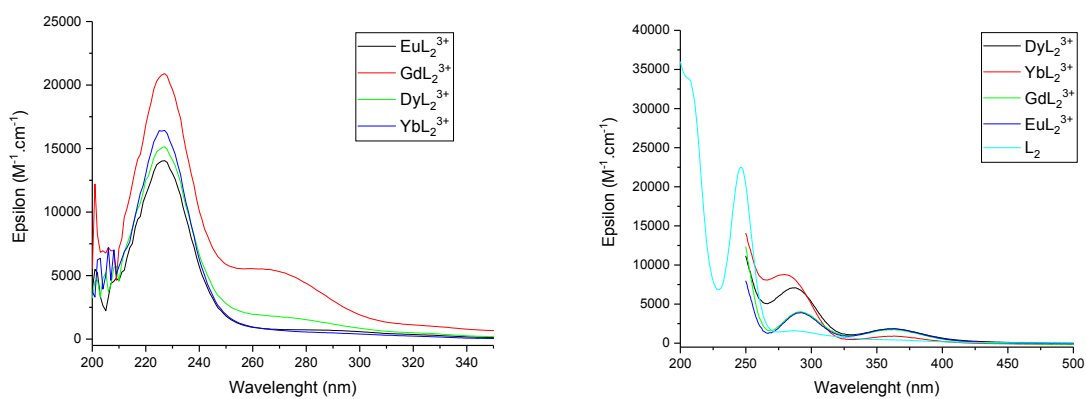

**Fig. S2** UV-Vis spectra of 0.5 mM solution of  $\text{YbL}_2^{3+}$ ,  $\text{DyL}_2^{3+}$ ,  $\text{EuL}_2^{3+}$  and  $\text{GdL}_2^{3+}$  (Left : in Water, Right : in MeCN)

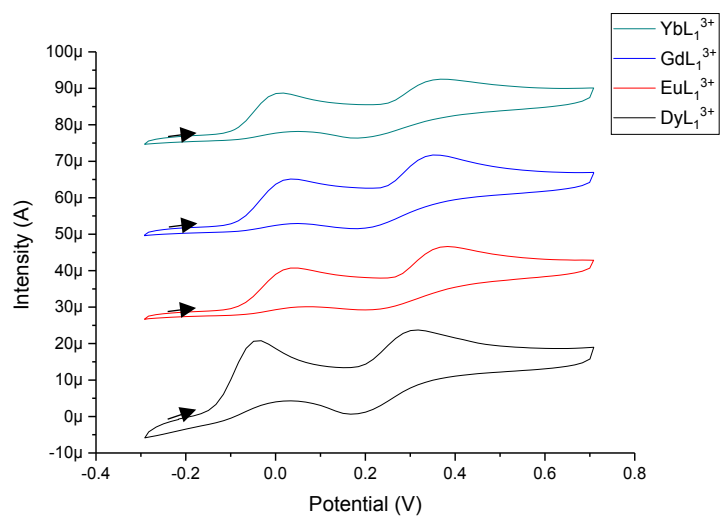

**Fig. S3** CV curves of 0.5 mM solution of  $\text{YbL}_1^{3+}$ ,  $\text{DyL}_1^{3+}$ ,  $\text{EuL}_1^{3+}$  and  $\text{GdL}_1^{3+}$  in  $\text{CH}_3\text{CN}$  containing TBAP. Scan rate = 0.1 V/sec; Ref:Fc<sup>+</sup>/Fc.

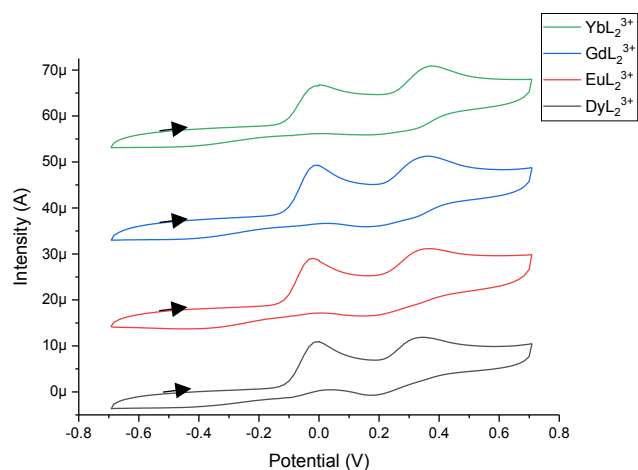

**Fig. S4** CV curves of 0.5 mM solution of  $\text{YbL}_2^{3+}$ ,  $\text{DyL}_2^{3+}$ ,  $\text{EuL}_2^{3+}$  and  $\text{GdL}_2^{3+}$  in  $\text{CH}_3\text{CN}$  containing TBAP. Scan rate = 0.1 V/sec; Ref:Fc<sup>+</sup>/Fc.

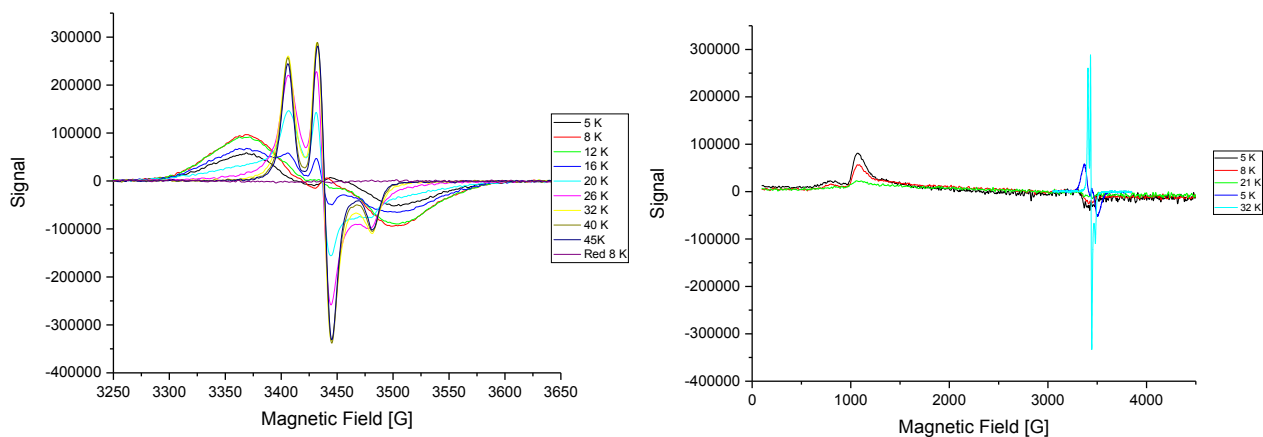

**Fig. S5** Low temperature evolution of the EPR spectrum of a 0.45 mM aqueous solution (containing 10% glycerol) of  $[\text{Yb}(\text{L}_1)]^{3+}$ . Microwave Freq; 9.63 GHz, power 0.2 mW; Mod. Freq. 100 KHz, Amp. 0.4 mT.

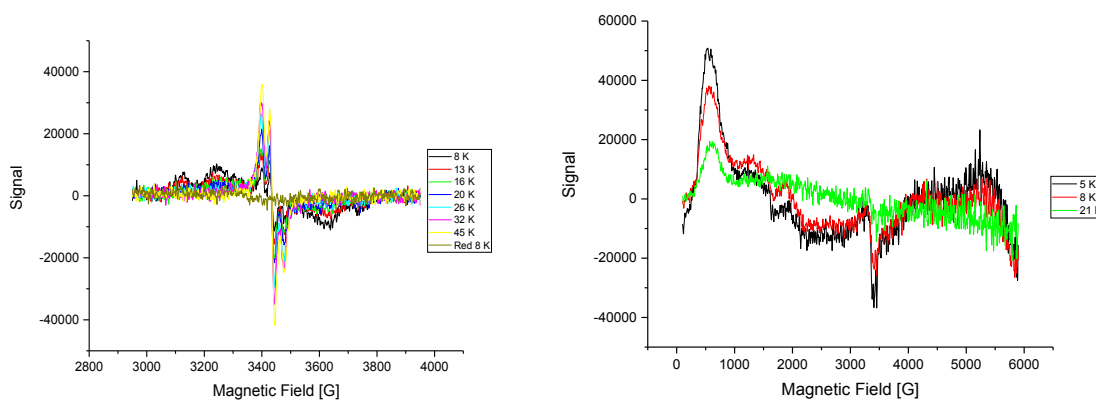

**Fig. S6** Low temperature evolution of the EPR spectrum of a 0.45 mM aqueous solution (containing 10% glycerol) of  $[\text{Dy}(\text{L}_1)]^{3+}$ . Microwave Freq; 9.63 GHz, power 4 mW; Mod. Freq. 100 KHz, Amp. 0.4 mT.

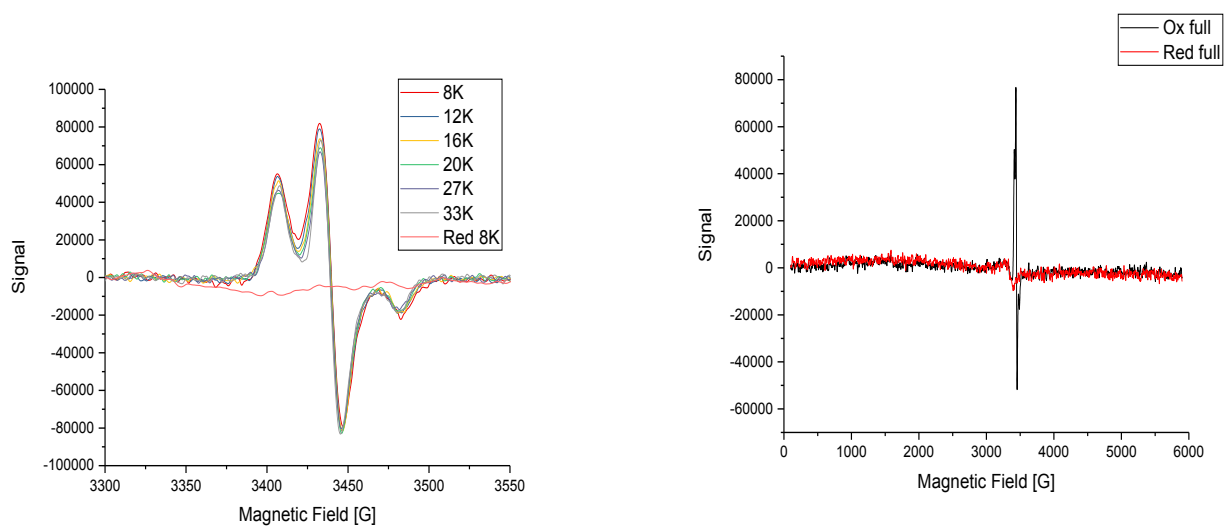

**Fig. S7** Low temperature evolution of the EPR spectrum of a 0.45 mM aqueous solution (containing 10% glycerol) of  $[\text{Eu}(\text{L}_1)]^{3+}$ . Microwave Freq; 9.63 GHz, power 0.2 mW; Mod. Freq. 100 KHz, Amp. 0.4 mT.

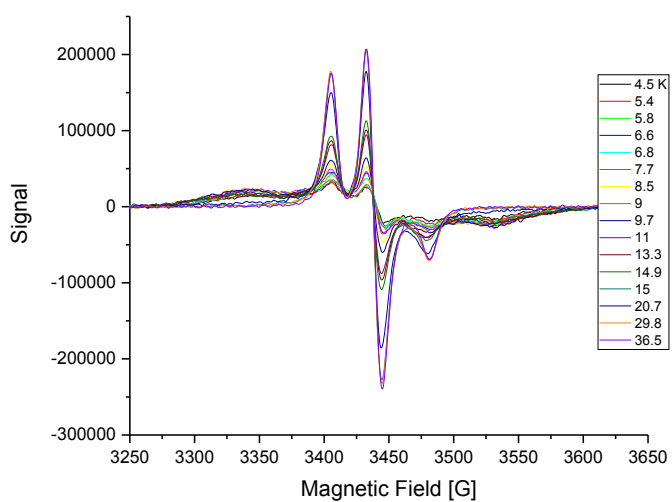

**Fig. S8** Low temperature evolution of the EPR spectrum of a 0.45 mM aqueous solution (containing 10% glycerol) of  $[\text{Yb}(\text{L}_2)]^{3+}$ . Microwave Freq; 9.63 GHz, power 2 mW; Mod. Freq. 100 KHz, Amp. 0.4 mT.

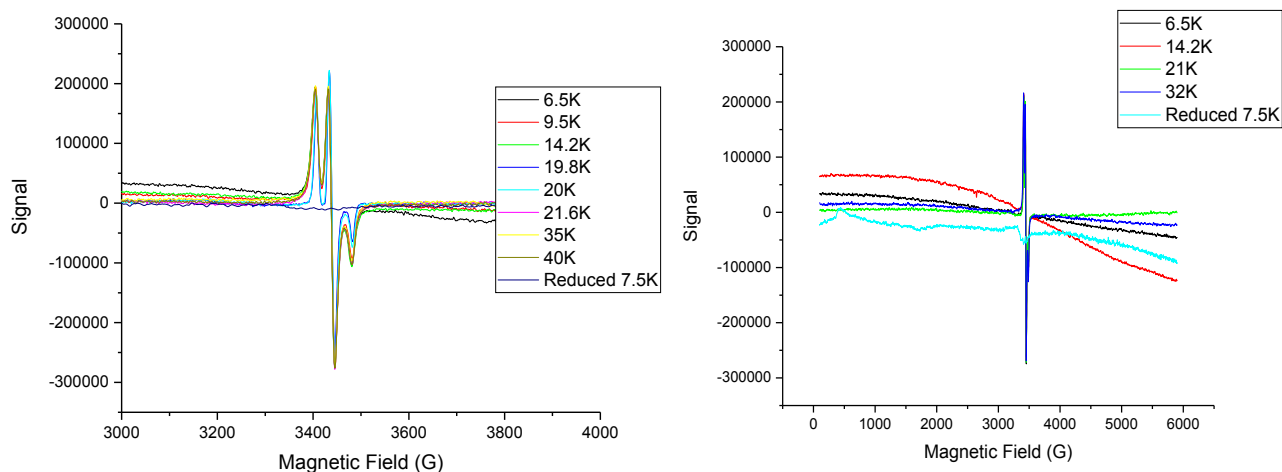

**Fig. S9** Low temperature evolution of the EPR spectrum of a 0.45 mM aqueous solution (containing 10% glycerol) of  $[\text{Dy}(\text{L}_2)]^{3+}$ . Microwave Freq; 9.63 GHz, power 2 mW (left), 4 mW (right); Mod. Freq. 100 KHz, Amp. 0.4 mT.

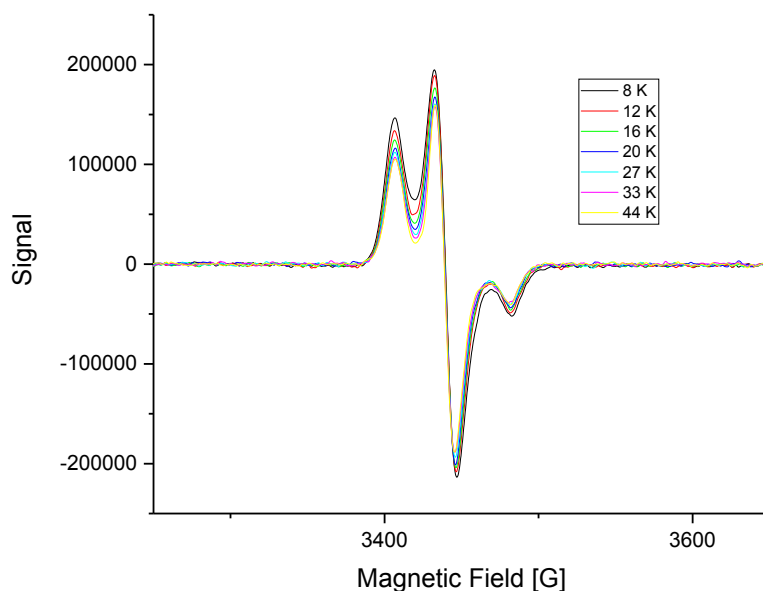

**Fig. S10** Low temperature evolution of the EPR spectrum of a 0.45 mM aqueous solution (containing 10% glycerol) of  $[\text{Eu}(\text{L}_2)]^{3+}$ . Microwave Freq; 9.63 GHz, power 0.2 mW; Mod. Freq. 100 KHz, Amp. 0.4 mT.

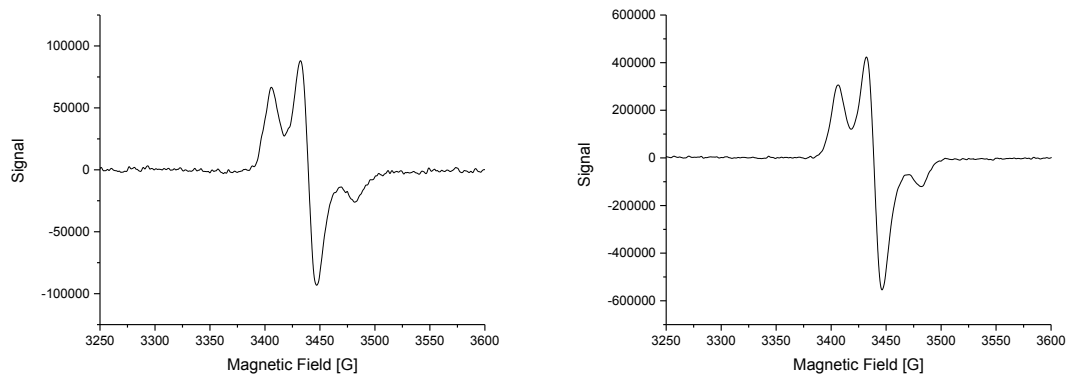

**Fig. S11** X-Band EPR spectra of 0.45 mM aqueous solutions (containing 10% glycerol) of  $L_1$  (left) and  $L_2$  (right). Microwave Freq; 9.63 GHz, power 2 mW; Mod. Freq. 100 KHz, Amp. 0.4 mT.  $T = 8.8$  K (left), 10.7 K (right).

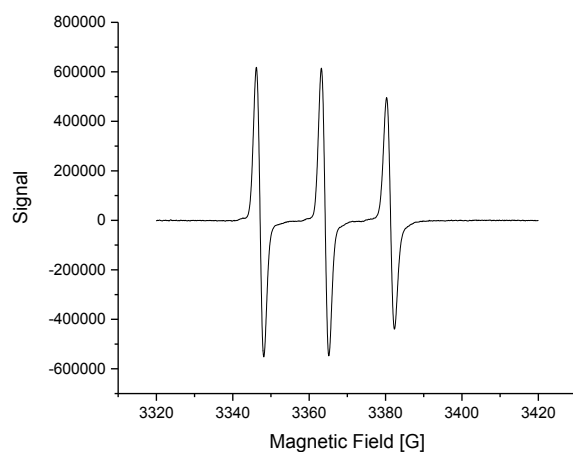

**Fig. S12** X-Band EPR spectrum of a 0.5 mM solution of  $L_2$  in water with HEPES buffer at pH 7.9. Microwave Freq; 9.42 GHz, power 3.5 mW; Mod. Freq. 100 KHz, Amp. 0.2 mT.  $T = 293$  K.

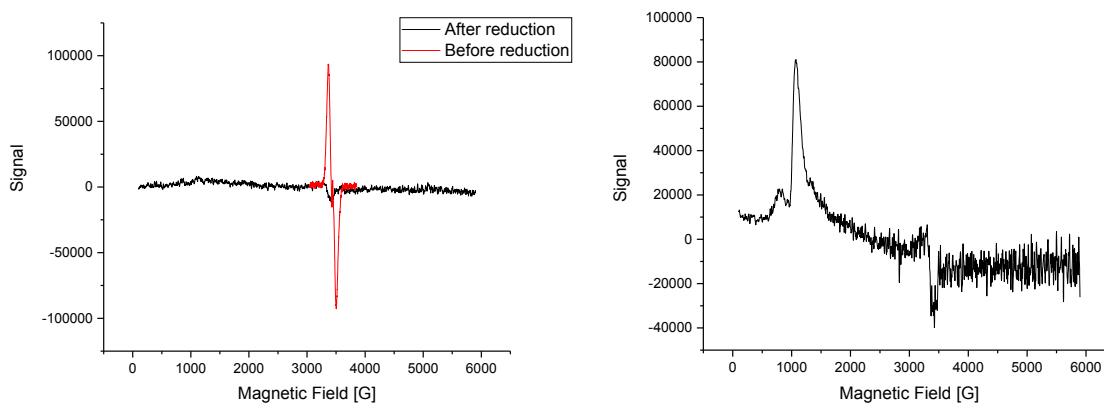

**Fig. S13** X-Band EPR spectrum of  $[\text{Yb}(\text{L}_1)]^{3+}$  after addition of 2 molar equiv. of ascorbate. Microwave Freq; 9.63 GHz, power 0.2 mW (left), 2 mW (right); Mod. Freq. 100 KHz, Amp. 0.4 mT (left), 1 mT (right). T = 7K (left), 5K (right).

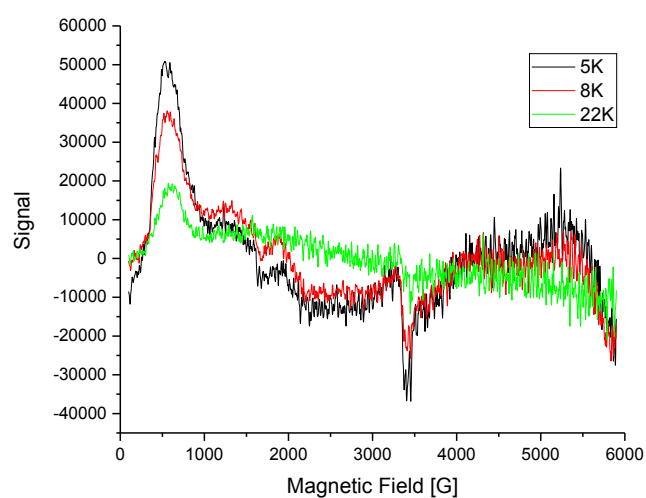

**Fig. S14** Low temperature evolution of the X-Band EPR spectrum of  $[\text{Dy}(\text{L}_1)]^{3+}$  after addition of 2 molar equiv. of ascorbate. Microwave Freq; 9.63 GHz, power 2 mW; Mod. Freq. 100 KHz, Amp. 1 mT.



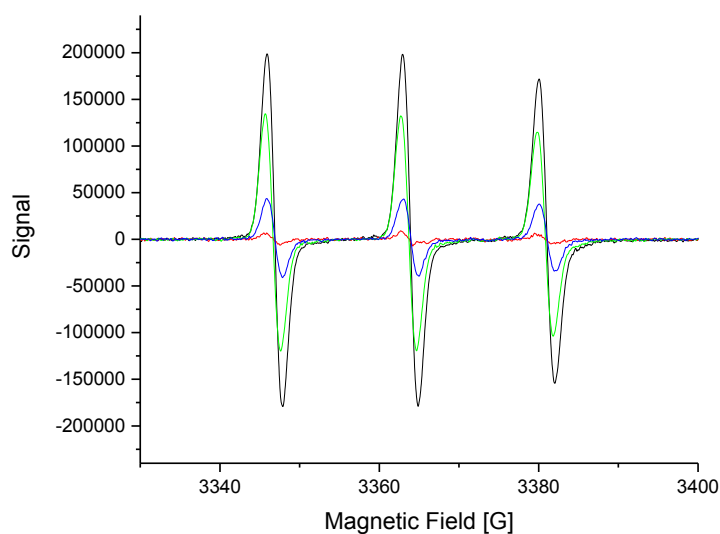

**Fig. S15** X-Band EPR spectrum of a 0.5 mM solution of  $[\text{Gd}(\text{L}_2)]^{3+}$  in water with HEPES buffer at pH 7. (black) initial; (red) after addition of 1 molar equivalent of ascorbate; (green) after addition of 1 molar equivalent of ascorbate followed by addition of  $\text{NaIO}_4$  in excess and 30 min reaction; (blue) after addition of 1 molar equivalent of ascorbate followed by increase of pH to 13 and dioxygen bubbling during 30 min. Microwave Freq; 9.42 GHz, power 3.5 mW; Mod. Freq. 100 KHz, Amp. 0.2 mT.  $T = 293$  K.

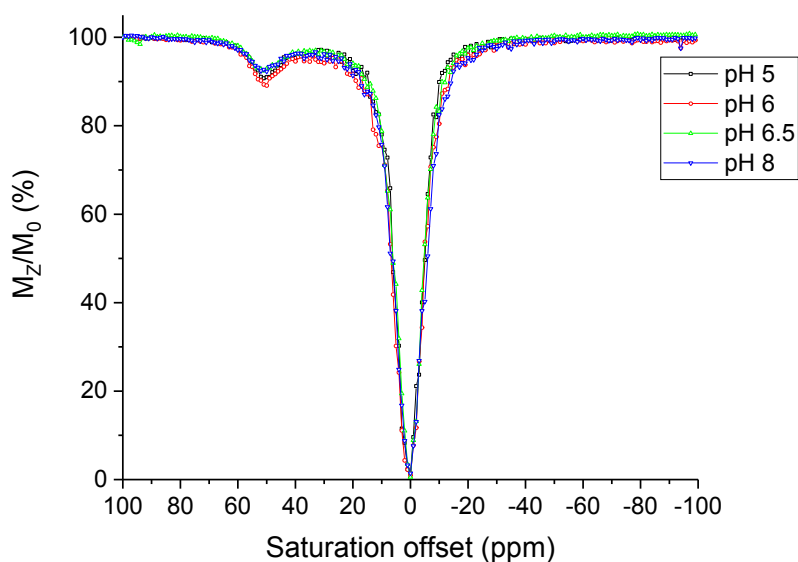

**Fig. S16** PARACEST spectra of  $[\text{Eu}(\text{L}_1)]^{3+}$  as a function of the pH. CEST at +51 ppm coming from the coordinated water molecules of the hydroxylamine  $\text{Eu}^{3+}$  complexes recorded at 11.7 T, 298 K,  $B_1 = 1064$  Hz (25  $\mu\text{T}$ ), concentration = 12 mM (66%  $\text{H}_2\text{O}$ -HEPES buffer 0.1M in  $\text{CD}_3\text{CN}$ ) and irradiation time = 3 s.

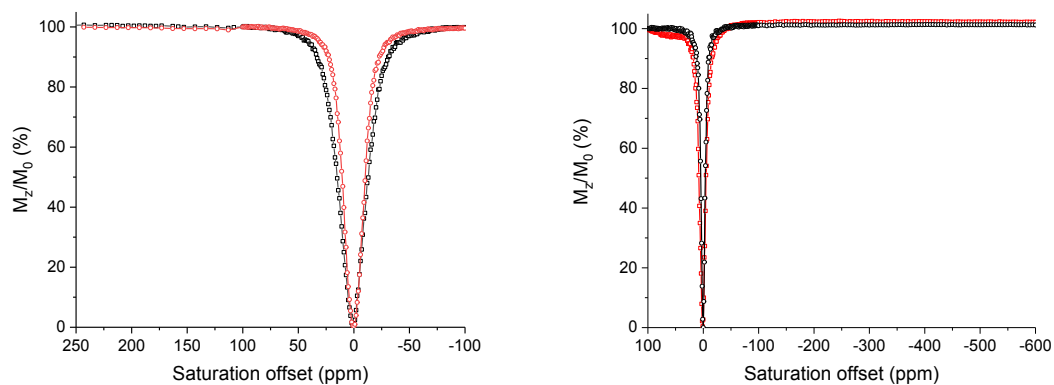

**Fig. S17** CEST spectra of 13 mM solution of  $[\text{Yb}(\text{L}_1)]^{3+}$  (Left) and  $[\text{Dy}(\text{L}_1)]^{3+}$  (Right) in oxidized (black) and reduced (red) forms using 2 eq of sodium ascorbate. Recorded at 11.7 T, 298 K, in mixture of 0.1M HEPES buffer pH 7.4 and  $\text{CD}_3\text{CN}$  (2/1),  $B_1 = 25 \mu\text{T}$ , and irradiation time of 3 s.

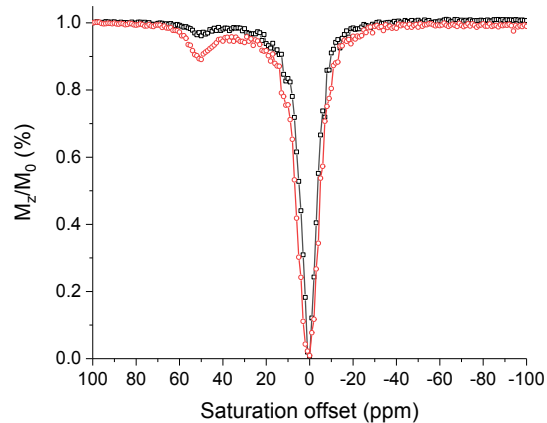

**Fig. S18** CEST spectra of 14 mM solution of  $[\text{Eu}(\text{L}_1)]^{3+}$  in oxidized (black) and reduced (red) forms using sodium ascorbate. Recorded at 11.7 T, 298 K, in mixture of 0.1M HEPES buffer pH 7.4 and  $\text{CD}_3\text{CN}$  (2/1),  $B_1 = 25 \mu\text{T}$ , and irradiation time of 3 s.

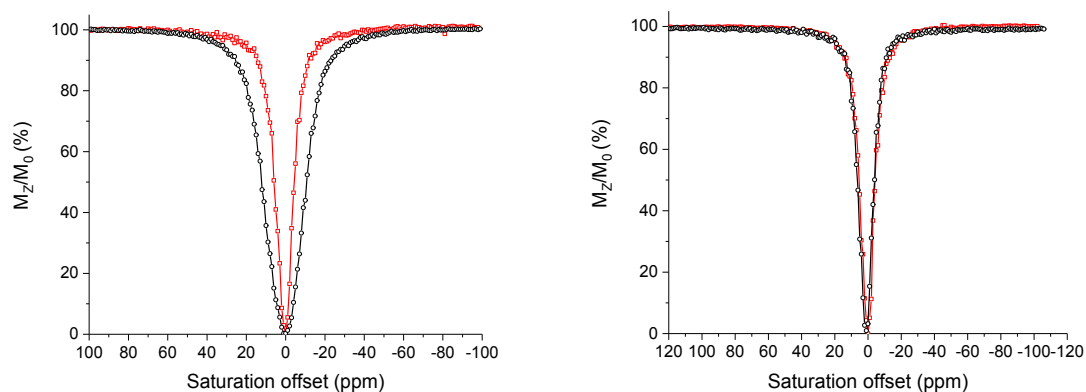

**Fig. S19** CEST spectra of 20 mM solution of  $[\text{Yb}(\text{L}_2)]^{3+}$  (Left) and  $[\text{Dy}(\text{L}_2)]^{3+}$  (Right) in oxidized (black) and reduced (red) forms using 2 eq of sodium ascorbate. Recorded at 11.7 T, 298 K, in mixture of 0.1M HEPES buffer pH 7.4 and  $\text{CD}_3\text{CN}$  (2/1),  $B_1 = 25 \mu\text{T}$ , and irradiation time of 3 s.

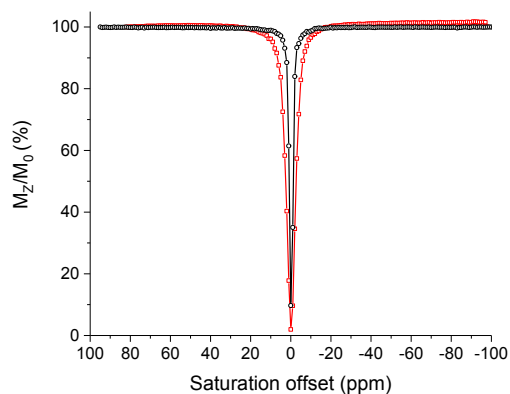

**Fig. S20** CEST spectra of 20 mM solution of  $[\text{Eu}(\text{L}_2)]^{3+}$  in oxidized (black) and reduced (red) forms using 2 eq of sodium ascorbate. Recorded at 11.7 T, 298 K, in mixture of 0.1M HEPES buffer pH 7.4 and  $\text{CD}_3\text{CN}$  (2/1),  $B_1 = 25 \mu\text{T}$ , and irradiation time of 3 s.

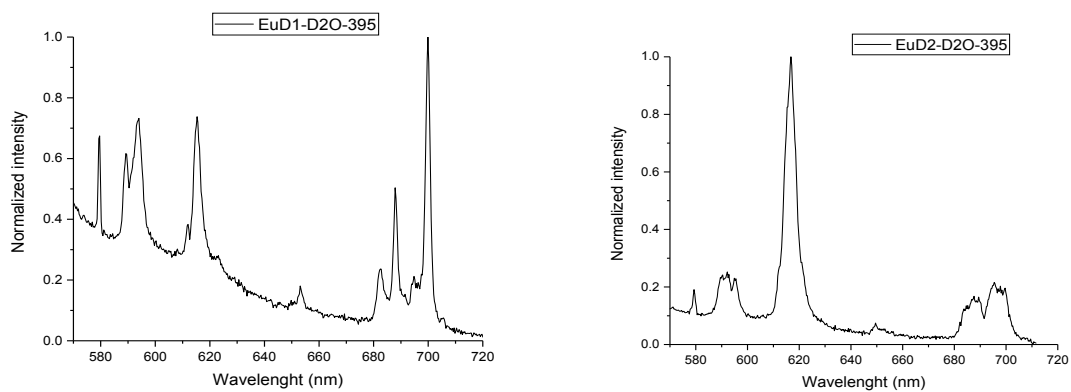

**Fig. S21** Luminescence spectra of  $[\text{Eu}(\text{L}_1)]^{3+}$  (left) and  $[\text{Eu}(\text{L}_2)]^{3+}$  (right) in  $\text{D}_2\text{O}$

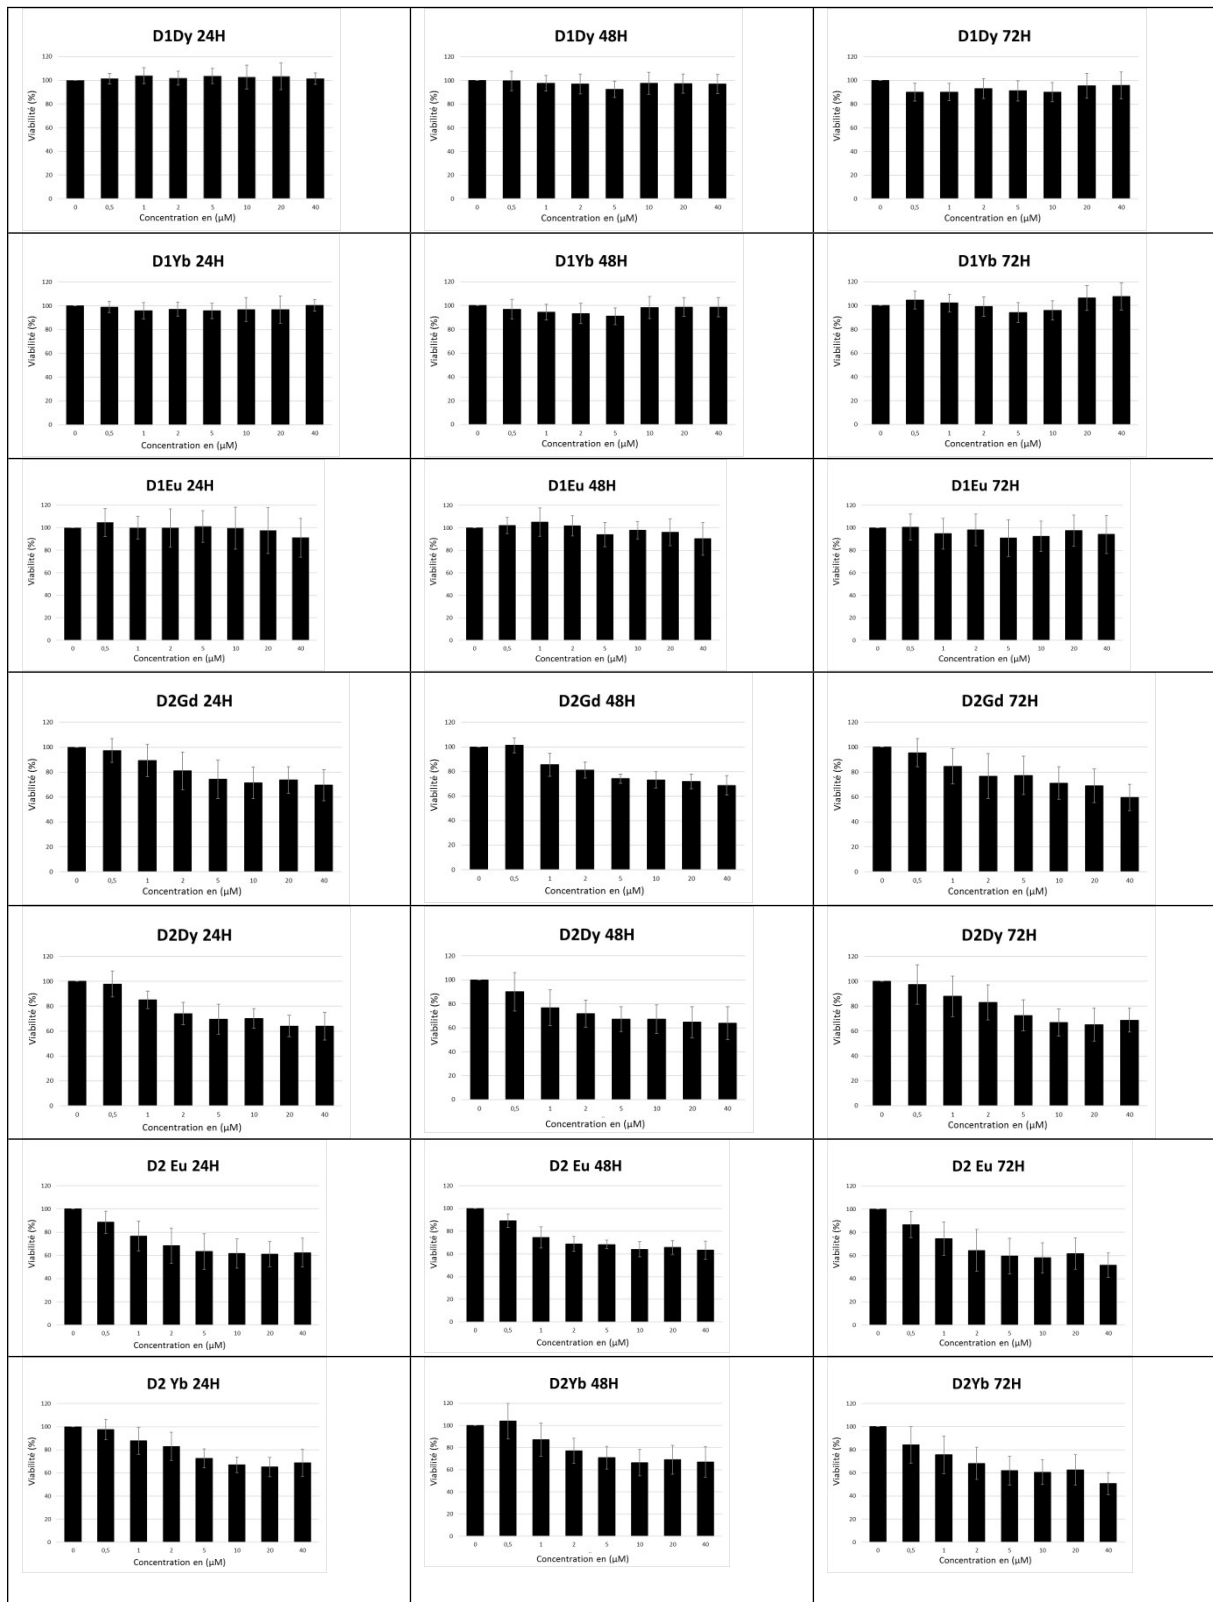

**Fig. S22** Cytotoxicity of D1 complexes tested in this study. M21 cells were incubated with different complexes at different time and concentration. Their viability was analysed using MTT assay.

### XYZ coordinates (B3LYP/6-31g\*-LANL2DZ for Y/PCM)

- $[Y(L_1)]^{3+}$  as a function of the dihedral angle O(amide)-Y-O(water)-H(water):

-15°

|   |              |              |              |
|---|--------------|--------------|--------------|
| Y | 1.508060000  | 0.059608000  | 0.339153000  |
| O | -0.763018000 | 0.363506000  | -0.148712000 |
| O | 0.802212000  | -2.005156000 | 1.235769000  |
| O | -7.305693000 | -0.323625000 | 1.029375000  |
| O | 1.454688000  | 2.397298000  | 0.708447000  |
| N | -6.222369000 | 0.068112000  | 0.458582000  |
| N | 1.077193000  | 1.177982000  | -2.052005000 |
| N | 3.691176000  | 1.341361000  | -0.508940000 |
| N | -2.509008000 | 1.221658000  | -1.314110000 |
| H | -2.793969000 | 1.806052000  | -2.093345000 |
| N | 0.944253000  | -1.797086000 | -1.504187000 |
| N | 3.558311000  | -1.637177000 | 0.048418000  |
| N | 2.374771000  | 4.451218000  | 0.900396000  |
| H | 1.492818000  | 4.851353000  | 1.199547000  |
| H | 3.175770000  | 5.065325000  | 0.830401000  |
| N | -0.227680000 | -4.013991000 | 1.166615000  |
| H | -0.137060000 | -4.128530000 | 2.169526000  |
| H | -0.686926000 | -4.748250000 | 0.643715000  |
| C | -0.237038000 | 1.857289000  | -1.959623000 |
| H | -0.662814000 | 2.062884000  | -2.950133000 |
| H | -0.097562000 | 2.818571000  | -1.455846000 |
| C | -3.568864000 | 0.614023000  | -0.493361000 |
| H | -3.052758000 | -0.070374000 | 0.181033000  |
| C | -1.209516000 | 1.078796000  | -1.086685000 |
| C | 0.219565000  | -2.906898000 | 0.586929000  |
| C | 3.817205000  | 2.570553000  | 0.307293000  |
| H | 4.467417000  | 3.314767000  | -0.170095000 |
| H | 4.270060000  | 2.310261000  | 1.269006000  |
| C | 2.455526000  | 3.152796000  | 0.641306000  |
| C | -5.422379000 | 1.094754000  | 1.210556000  |
| C | -4.552679000 | -0.146606000 | -1.384829000 |
| H | -5.014396000 | 0.563404000  | -2.083459000 |
| H | -4.024514000 | -0.895278000 | -1.984832000 |
| C | -4.324666000 | 1.685076000  | 0.299729000  |
| H | -3.630555000 | 2.258943000  | 0.923037000  |
| H | -4.782285000 | 2.387369000  | -0.408836000 |
| C | -5.661493000 | -0.859171000 | -0.582632000 |
| C | 2.150693000  | 2.173209000  | -2.349622000 |
| H | 1.911103000  | 3.101643000  | -1.830371000 |
| H | 2.164690000  | 2.415797000  | -3.420988000 |
| C | -0.037527000 | -2.724734000 | -0.898580000 |
| H | -0.066868000 | -3.689726000 | -1.421417000 |
| H | -1.035564000 | -2.282115000 | -0.973941000 |
| C | 0.351700000  | -1.158068000 | -2.716185000 |
| H | -0.702485000 | -0.962133000 | -2.516121000 |
| H | 0.381744000  | -1.847463000 | -3.571031000 |

|   |              |              |              |
|---|--------------|--------------|--------------|
| C | -4.822590000 | 0.447586000  | 2.477941000  |
| H | -5.614630000 | -0.051673000 | 3.043282000  |
| H | -4.375899000 | 1.220822000  | 3.112066000  |
| H | -4.047558000 | -0.289174000 | 2.248183000  |
| C | -6.387489000 | 2.218748000  | 1.623735000  |
| H | -6.882368000 | 2.647925000  | 0.746184000  |
| H | -5.826537000 | 3.012335000  | 2.128141000  |
| H | -7.152373000 | 1.841209000  | 2.305062000  |
| C | 3.990525000  | -2.005284000 | 1.414659000  |
| H | 5.014058000  | -2.401356000 | 1.428046000  |
| H | 3.330509000  | -2.791087000 | 1.794341000  |
| C | -6.809546000 | -1.228680000 | -1.536830000 |
| H | -6.422341000 | -1.857663000 | -2.345025000 |
| H | -7.251523000 | -0.329467000 | -1.978644000 |
| H | -7.591399000 | -1.776684000 | -1.007707000 |
| C | 4.899996000  | 0.485237000  | -0.315818000 |
| H | 5.204937000  | 0.558220000  | 0.728836000  |
| H | 5.741211000  | 0.866255000  | -0.910667000 |
| C | 4.666408000  | -0.972447000 | -0.700371000 |
| H | 4.439862000  | -1.041904000 | -1.764983000 |
| H | 5.605121000  | -1.524134000 | -0.549703000 |
| C | -5.134984000 | -2.138836000 | 0.102173000  |
| H | -4.878453000 | -2.885823000 | -0.656636000 |
| H | -5.913019000 | -2.553518000 | 0.749349000  |
| H | -4.243366000 | -1.956579000 | 0.709589000  |
| C | 3.110991000  | -2.850648000 | -0.699323000 |
| H | 2.608094000  | -3.519351000 | -0.000002000 |
| H | 3.976655000  | -3.405245000 | -1.086200000 |
| C | 3.542469000  | 1.682132000  | -1.956094000 |
| H | 3.799647000  | 0.794109000  | -2.535101000 |
| H | 4.273052000  | 2.454049000  | -2.236803000 |
| C | 3.837726000  | -0.841839000 | 2.381775000  |
| C | 2.195391000  | -2.521319000 | -1.876897000 |
| H | 2.731135000  | -1.909397000 | -2.603421000 |
| H | 1.945349000  | -3.459705000 | -2.391941000 |
| C | 1.061703000  | 0.130759000  | -3.116638000 |
| H | 2.095559000  | -0.083837000 | -3.390948000 |
| H | 0.580195000  | 0.524387000  | -4.022812000 |
| O | 2.983521000  | 0.053494000  | 2.162430000  |
| O | 0.242236000  | 0.513652000  | 2.399148000  |
| H | 0.664332000  | 1.183912000  | 2.963583000  |
| H | -0.631530000 | 0.873823000  | 2.165951000  |
| N | 4.595431000  | -0.833872000 | 3.469911000  |
| H | 5.293981000  | -1.544597000 | 3.645254000  |
| H | 4.464229000  | -0.112422000 | 4.169796000  |

**-25°**

|   |              |              |              |
|---|--------------|--------------|--------------|
| Y | 1.504994000  | 0.059635000  | 0.337668000  |
| O | -0.761039000 | 0.370503000  | -0.145325000 |
| O | 0.810317000  | -2.013959000 | 1.228496000  |
| O | -7.303892000 | -0.332996000 | 1.027843000  |

|   |              |              |              |
|---|--------------|--------------|--------------|
| O | 1.444587000  | 2.399781000  | 0.699925000  |
| N | -6.221239000 | 0.062112000  | 0.458079000  |
| N | 1.076000000  | 1.184229000  | -2.052448000 |
| N | 3.687057000  | 1.344451000  | -0.502903000 |
| N | -2.508806000 | 1.226416000  | -1.309520000 |
| H | -2.794775000 | 1.809841000  | -2.089100000 |
| N | 0.943843000  | -1.791487000 | -1.509613000 |
| N | 3.558348000  | -1.634891000 | 0.043684000  |
| N | 2.365523000  | 4.452166000  | 0.906092000  |
| H | 1.481949000  | 4.852521000  | 1.199997000  |
| H | 3.167848000  | 5.065327000  | 0.843903000  |
| N | -0.222286000 | -4.021354000 | 1.152655000  |
| H | -0.128529000 | -4.141276000 | 2.154623000  |
| H | -0.683933000 | -4.752347000 | 0.627345000  |
| C | -0.238208000 | 1.863089000  | -1.958536000 |
| H | -0.665923000 | 2.067137000  | -2.948558000 |
| H | -0.098495000 | 2.824989000  | -1.456167000 |
| C | -3.567583000 | 0.616687000  | -0.489153000 |
| H | -3.049870000 | -0.063297000 | 0.188472000  |
| C | -1.208804000 | 1.084650000  | -1.083197000 |
| C | 0.224376000  | -2.911513000 | 0.577348000  |
| C | 3.809797000  | 2.571638000  | 0.316809000  |
| H | 4.463513000  | 3.316261000  | -0.155166000 |
| H | 4.256926000  | 2.308518000  | 1.280455000  |
| C | 2.446390000  | 3.154207000  | 0.643400000  |
| C | -5.427249000 | 1.094189000  | 1.208963000  |
| C | -4.546104000 | -0.150774000 | -1.380811000 |
| H | -5.008414000 | 0.555210000  | -2.083102000 |
| H | -4.013269000 | -0.899234000 | -1.976948000 |
| C | -4.330089000 | 1.686657000  | 0.298947000  |
| H | -3.640012000 | 2.265549000  | 0.922063000  |
| H | -4.789233000 | 2.384843000  | -0.412706000 |
| C | -5.654484000 | -0.865290000 | -0.579825000 |
| C | 2.150220000  | 2.179522000  | -2.346771000 |
| H | 1.909214000  | 3.107898000  | -1.828278000 |
| H | 2.167433000  | 2.422258000  | -3.418077000 |
| C | -0.037217000 | -2.721390000 | -0.906415000 |
| H | -0.069128000 | -3.683451000 | -1.434474000 |
| H | -1.034905000 | -2.277076000 | -0.976673000 |
| C | 0.350537000  | -1.150190000 | -2.720059000 |
| H | -0.703426000 | -0.954065000 | -2.518672000 |
| H | 0.379427000  | -1.838287000 | -3.575989000 |
| C | -4.827563000 | 0.452762000  | 2.479315000  |
| H | -5.618830000 | -0.048075000 | 3.044324000  |
| H | -4.385100000 | 1.229388000  | 3.112271000  |
| H | -4.049211000 | -0.281557000 | 2.253021000  |
| C | -6.398050000 | 2.215142000  | 1.616967000  |
| H | -6.892037000 | 2.640548000  | 0.737070000  |
| H | -5.841831000 | 3.012051000  | 2.121398000  |
| H | -7.163442000 | 1.835909000  | 2.296761000  |
| C | 3.989551000  | -2.008342000 | 1.408824000  |
| H | 5.013868000  | -2.402379000 | 1.421810000  |



|   |              |              |              |
|---|--------------|--------------|--------------|
| H | 3.330489000  | -2.797024000 | 1.784047000  |
| C | -6.798944000 | -1.240857000 | -1.535986000 |
| H | -6.407636000 | -1.870082000 | -2.342037000 |
| H | -7.243031000 | -0.344091000 | -1.980648000 |
| H | -7.580106000 | -1.790587000 | -1.007625000 |
| C | 4.897080000  | 0.490120000  | -0.310012000 |
| H | 5.199166000  | 0.559715000  | 0.735750000  |
| H | 5.739070000  | 0.875157000  | -0.901180000 |
| C | 4.666829000  | -0.966367000 | -0.700803000 |
| H | 4.442250000  | -1.032220000 | -1.766072000 |
| H | 5.606101000  | -1.517227000 | -0.550535000 |
| C | -5.125030000 | -2.141566000 | 0.109050000  |
| H | -4.864975000 | -2.889619000 | -0.647510000 |
| H | -5.902678000 | -2.557117000 | 0.756110000  |
| H | -4.234860000 | -1.954795000 | 0.717199000  |
| C | 3.112703000  | -2.845911000 | -0.709179000 |
| H | 2.611876000  | -3.518854000 | -0.012562000 |
| H | 3.979162000  | -3.396980000 | -1.099314000 |
| C | 3.541070000  | 1.688413000  | -1.949851000 |
| H | 3.800070000  | 0.801641000  | -2.529931000 |
| H | 4.272092000  | 2.461183000  | -2.227089000 |
| C | 3.833197000  | -0.850591000 | 2.381945000  |
| C | 2.195674000  | -2.513624000 | -1.884829000 |
| H | 2.730496000  | -1.898902000 | -2.609693000 |
| H | 1.946123000  | -3.450607000 | -2.402659000 |
| C | 1.060581000  | 0.139175000  | -3.118853000 |
| H | 2.094381000  | -0.074787000 | -3.393973000 |
| H | 0.578670000  | 0.534104000  | -4.024278000 |
| O | 2.975466000  | 0.043042000  | 2.167617000  |
| O | 0.263010000  | 0.505173000  | 2.409606000  |
| H | 0.773652000  | 1.025822000  | 3.053256000  |
| H | -0.548385000 | 1.012374000  | 2.234480000  |
| N | 4.590819000  | -0.845646000 | 3.469909000  |
| H | 5.291688000  | -1.555053000 | 3.641406000  |
| H | 4.457317000  | -0.128336000 | 4.173631000  |

**-35°**

|   |              |              |              |
|---|--------------|--------------|--------------|
| Y | 1.502382000  | 0.059538000  | 0.335583000  |
| O | -0.760009000 | 0.376145000  | -0.143707000 |
| O | 0.812514000  | -2.015507000 | 1.225106000  |
| O | -7.303023000 | -0.340722000 | 1.026381000  |
| O | 1.439476000  | 2.399910000  | 0.699022000  |
| N | -6.220697000 | 0.057241000  | 0.457970000  |
| N | 1.074115000  | 1.190136000  | -2.052276000 |
| N | 3.683989000  | 1.345807000  | -0.499979000 |
| N | -2.509494000 | 1.231877000  | -1.305471000 |
| H | -2.796399000 | 1.815304000  | -2.084679000 |
| N | 0.941593000  | -1.786617000 | -1.513526000 |
| N | 3.557544000  | -1.634943000 | 0.037823000  |
| N | 2.361402000  | 4.451086000  | 0.913627000  |
| H | 1.477411000  | 4.851411000  | 1.206288000  |

|   |              |              |              |
|---|--------------|--------------|--------------|
| H | 3.164408000  | 5.063722000  | 0.855340000  |
| N | -0.220339000 | -4.022653000 | 1.145584000  |
| H | -0.124988000 | -4.145275000 | 2.147078000  |
| H | -0.682779000 | -4.752283000 | 0.619075000  |
| C | -0.239746000 | 1.869664000  | -1.956660000 |
| H | -0.668497000 | 2.074008000  | -2.946167000 |
| H | -0.099141000 | 2.831363000  | -1.454244000 |
| C | -3.567161000 | 0.619406000  | -0.485819000 |
| H | -3.047979000 | -0.058415000 | 0.192850000  |
| C | -1.209000000 | 1.090530000  | -1.080391000 |
| C | 0.225342000  | -2.911278000 | 0.572548000  |
| C | 3.805718000  | 2.570969000  | 0.322940000  |
| H | 4.461068000  | 3.316218000  | -0.145745000 |
| H | 4.250570000  | 2.305156000  | 1.286942000  |
| C | 2.441838000  | 3.153748000  | 0.647487000  |
| C | -5.430709000 | 1.091898000  | 1.209519000  |
| C | -4.542213000 | -0.151623000 | -1.378312000 |
| H | -5.005444000 | 0.552513000  | -2.081840000 |
| H | -4.006282000 | -0.898928000 | -1.973127000 |
| C | -4.334113000 | 1.687316000  | 0.300697000  |
| H | -3.646709000 | 2.268662000  | 0.924460000  |
| H | -4.794491000 | 2.383756000  | -0.411875000 |
| C | -5.649856000 | -0.868883000 | -0.578806000 |
| C | 2.149111000  | 2.185133000  | -2.344491000 |
| H | 1.908005000  | 3.113170000  | -1.825461000 |
| H | 2.167813000  | 2.428890000  | -3.415535000 |
| C | -0.038957000 | -2.717151000 | -0.910349000 |
| H | -0.073029000 | -3.677819000 | -1.440768000 |
| H | -1.036323000 | -2.271557000 | -0.977390000 |
| C | 0.347011000  | -1.142962000 | -2.722238000 |
| H | -0.706540000 | -0.946452000 | -2.519087000 |
| H | 0.374316000  | -1.829885000 | -3.579144000 |
| C | -4.830805000 | 0.452548000  | 2.480818000  |
| H | -5.621380000 | -0.050268000 | 3.045040000  |
| H | -4.391187000 | 1.230599000  | 3.114003000  |
| H | -4.050175000 | -0.279703000 | 2.255700000  |
| C | -6.405347000 | 2.210079000  | 1.615933000  |
| H | -6.899197000 | 2.634036000  | 0.735257000  |
| H | -5.852234000 | 3.008617000  | 2.121202000  |
| H | -7.170720000 | 1.828686000  | 2.294546000  |
| C | 3.990077000  | -2.013586000 | 1.401067000  |
| H | 5.014910000  | -2.406325000 | 1.411919000  |
| H | 3.332347000  | -2.804709000 | 1.773462000  |
| C | -6.791907000 | -1.247821000 | -1.536530000 |
| H | -6.397771000 | -1.876298000 | -2.341792000 |
| H | -7.237715000 | -0.352387000 | -1.982161000 |
| H | -7.572411000 | -1.799412000 | -1.009124000 |
| C | 4.894505000  | 0.491754000  | -0.308723000 |
| H | 5.195397000  | 0.558171000  | 0.737609000  |
| H | 5.736765000  | 0.879512000  | -0.897717000 |
| C | 4.665524000  | -0.963538000 | -0.704689000 |
| H | 4.440934000  | -1.026079000 | -1.770154000 |

|   |              |              |              |
|---|--------------|--------------|--------------|
| H | 5.605188000  | -1.514239000 | -0.556320000 |
| C | -5.118041000 | -2.143549000 | 0.111227000  |
| H | -4.855388000 | -2.891301000 | -0.644726000 |
| H | -5.895352000 | -2.560686000 | 0.757678000  |
| H | -4.228969000 | -1.954309000 | 0.720195000  |
| C | 3.111398000  | -2.843607000 | -0.718625000 |
| H | 2.611639000  | -3.519093000 | -0.023687000 |
| H | 3.977557000  | -3.393092000 | -1.111638000 |
| C | 3.539305000  | 1.693082000  | -1.946499000 |
| H | 3.798754000  | 0.807411000  | -2.528036000 |
| H | 4.270929000  | 2.466202000  | -2.221166000 |
| C | 3.832606000  | -0.860910000 | 2.379617000  |
| C | 2.192797000  | -2.508165000 | -1.892065000 |
| H | 2.726802000  | -1.891662000 | -2.616043000 |
| H | 1.942362000  | -3.443801000 | -2.411902000 |
| C | 1.057365000  | 0.146668000  | -3.120124000 |
| H | 2.090785000  | -0.067156000 | -3.396850000 |
| H | 0.574538000  | 0.542880000  | -4.024489000 |
| O | 2.971859000  | 0.031526000  | 2.170504000  |
| O | 0.286330000  | 0.506780000  | 2.421742000  |
| H | 0.873488000  | 0.884022000  | 3.099764000  |
| H | -0.440786000 | 1.142636000  | 2.307582000  |
| N | 4.591325000  | -0.858908000 | 3.466538000  |
| H | 5.294212000  | -1.567340000 | 3.633907000  |
| H | 4.457110000  | -0.145033000 | 4.173645000  |

**-45°**

|   |              |              |              |
|---|--------------|--------------|--------------|
| Y | 1.500929000  | 0.059859000  | 0.333231000  |
| O | -0.760169000 | 0.376242000  | -0.145553000 |
| O | 0.813372000  | -2.013309000 | 1.224059000  |
| O | -7.302832000 | -0.345496000 | 1.027530000  |
| O | 1.431687000  | 2.399348000  | 0.699314000  |
| N | -6.221005000 | 0.053567000  | 0.458924000  |
| N | 1.071933000  | 1.193569000  | -2.053188000 |
| N | 3.679612000  | 1.348553000  | -0.498155000 |
| N | -2.511254000 | 1.232497000  | -1.304551000 |
| H | -2.799038000 | 1.816479000  | -2.083005000 |
| N | 0.941929000  | -1.784272000 | -1.516079000 |
| N | 3.558744000  | -1.634005000 | 0.033333000  |
| N | 2.352717000  | 4.450318000  | 0.919833000  |
| H | 1.468095000  | 4.849770000  | 1.211824000  |
| H | 3.155616000  | 5.063351000  | 0.864139000  |
| N | -0.220409000 | -4.019836000 | 1.144374000  |
| H | -0.125709000 | -4.142080000 | 2.145982000  |
| H | -0.682784000 | -4.749539000 | 0.617897000  |
| C | -0.242483000 | 1.871952000  | -1.957231000 |
| H | -0.671703000 | 2.075726000  | -2.946658000 |
| H | -0.102790000 | 2.833826000  | -1.454953000 |
| C | -3.567937000 | 0.619119000  | -0.484439000 |
| H | -3.047605000 | -0.056313000 | 0.195741000  |
| C | -1.210364000 | 1.091419000  | -1.080705000 |

|   |              |              |              |
|---|--------------|--------------|--------------|
| C | 0.226184000  | -2.909007000 | 0.571171000  |
| C | 3.798854000  | 2.571984000  | 0.327904000  |
| H | 4.454834000  | 3.318619000  | -0.137609000 |
| H | 4.241835000  | 2.304015000  | 1.292201000  |
| C | 2.434089000  | 3.153675000  | 0.651223000  |
| C | -5.433363000 | 1.091054000  | 1.209013000  |
| C | -4.541019000 | -0.155483000 | -1.376064000 |
| H | -5.004930000 | 0.546412000  | -2.081369000 |
| H | -4.003285000 | -0.902982000 | -1.969016000 |
| C | -4.337484000 | 1.686911000  | 0.299670000  |
| H | -3.651514000 | 2.270788000  | 0.922641000  |
| H | -4.798900000 | 2.381118000  | -0.414429000 |
| C | -5.648021000 | -0.873202000 | -0.576084000 |
| C | 2.146210000  | 2.189722000  | -2.343637000 |
| H | 1.903615000  | 3.117186000  | -1.824250000 |
| H | 2.166040000  | 2.434250000  | -3.414481000 |
| C | -0.037528000 | -2.715596000 | -0.912133000 |
| H | -0.070434000 | -3.676696000 | -1.441832000 |
| H | -1.035406000 | -2.271231000 | -0.979689000 |
| C | 0.346171000  | -1.139757000 | -2.723920000 |
| H | -0.707320000 | -0.943822000 | -2.519998000 |
| H | 0.373253000  | -1.826049000 | -3.581326000 |
| C | -4.832825000 | 0.455081000  | 2.481700000  |
| H | -5.622672000 | -0.048346000 | 3.046393000  |
| H | -4.395022000 | 1.235100000  | 3.113722000  |
| H | -4.050563000 | -0.275930000 | 2.258193000  |
| C | -6.410363000 | 2.208082000  | 1.612923000  |
| H | -6.904405000 | 2.629653000  | 0.731204000  |
| H | -5.859087000 | 3.008510000  | 2.117220000  |
| H | -7.175498000 | 1.826420000  | 2.291648000  |
| C | 3.993996000  | -2.016554000 | 1.394544000  |
| H | 5.019373000  | -2.407942000 | 1.402596000  |
| H | 3.338030000  | -2.809839000 | 1.765469000  |
| C | -6.788940000 | -1.255472000 | -1.533847000 |
| H | -6.393372000 | -1.884586000 | -2.337918000 |
| H | -7.235904000 | -0.361439000 | -1.981128000 |
| H | -7.568880000 | -1.807476000 | -1.006032000 |
| C | 4.891508000  | 0.495850000  | -0.308445000 |
| H | 5.191972000  | 0.560175000  | 0.738124000  |
| H | 5.733245000  | 0.886581000  | -0.896192000 |
| C | 4.664883000  | -0.958812000 | -0.708443000 |
| H | 4.439518000  | -1.018793000 | -1.773888000 |
| H | 5.605680000  | -1.508196000 | -0.562435000 |
| C | -5.114560000 | -2.145914000 | 0.116265000  |
| H | -4.850672000 | -2.894571000 | -0.638364000 |
| H | -5.891400000 | -2.563078000 | 0.763261000  |
| H | -4.225881000 | -1.954301000 | 0.725047000  |
| C | 3.112868000  | -2.841488000 | -0.725169000 |
| H | 2.613930000  | -3.518446000 | -0.030989000 |
| H | 3.979051000  | -3.389830000 | -1.119751000 |
| C | 3.536264000  | 1.698703000  | -1.944340000 |
| H | 3.797539000  | 0.814440000  | -2.527173000 |

|   |              |              |              |
|---|--------------|--------------|--------------|
| H | 4.267504000  | 2.473106000  | -2.216317000 |
| C | 3.836287000  | -0.867842000 | 2.377183000  |
| C | 2.193037000  | -2.504824000 | -1.897043000 |
| H | 2.726004000  | -1.887077000 | -2.620729000 |
| H | 1.942360000  | -3.439775000 | -2.417976000 |
| C | 1.055826000  | 0.150574000  | -3.121452000 |
| H | 2.089331000  | -0.062393000 | -3.398616000 |
| H | 0.572431000  | 0.546701000  | -4.025550000 |
| O | 2.973209000  | 0.023621000  | 2.172084000  |
| O | 0.306874000  | 0.508639000  | 2.433387000  |
| H | 0.945926000  | 0.751728000  | 3.126305000  |
| H | -0.314658000 | 1.253508000  | 2.366171000  |
| N | 4.596354000  | -0.867905000 | 3.462939000  |
| H | 5.300747000  | -1.575645000 | 3.627002000  |
| H | 4.462081000  | -0.156410000 | 4.172459000  |

**-55°**

|   |              |              |              |
|---|--------------|--------------|--------------|
| Y | 1.499933000  | 0.060600000  | 0.330302000  |
| O | -0.760031000 | 0.370269000  | -0.154412000 |
| O | 0.808323000  | -2.005328000 | 1.226249000  |
| O | -7.300420000 | -0.345599000 | 1.031953000  |
| O | 1.427104000  | 2.398804000  | 0.700264000  |
| N | -6.219406000 | 0.053187000  | 0.461592000  |
| N | 1.071700000  | 1.193857000  | -2.055485000 |
| N | 3.676825000  | 1.349181000  | -0.496963000 |
| N | -2.512240000 | 1.231354000  | -1.308011000 |
| H | -2.800804000 | 1.817882000  | -2.084247000 |
| N | 0.942864000  | -1.784605000 | -1.516947000 |
| N | 3.558569000  | -1.635371000 | 0.032417000  |
| N | 2.348335000  | 4.449330000  | 0.923984000  |
| H | 1.463516000  | 4.848500000  | 1.215873000  |
| H | 3.151352000  | 5.062391000  | 0.869844000  |
| N | -0.227402000 | -4.010689000 | 1.149674000  |
| H | -0.136199000 | -4.129359000 | 2.152050000  |
| H | -0.688703000 | -4.741908000 | 0.624340000  |
| C | -0.243567000 | 1.870873000  | -1.961778000 |
| H | -0.671749000 | 2.073417000  | -2.951914000 |
| H | -0.105926000 | 2.833367000  | -1.460114000 |
| C | -3.567866000 | 0.617708000  | -0.486763000 |
| H | -3.046667000 | -0.058790000 | 0.191680000  |
| C | -1.211031000 | 1.088703000  | -1.086295000 |
| C | 0.222438000  | -2.902680000 | 0.573941000  |
| C | 3.794855000  | 2.571548000  | 0.331091000  |
| H | 4.451646000  | 3.318758000  | -0.132262000 |
| H | 4.236355000  | 2.302028000  | 1.295666000  |
| C | 2.429916000  | 3.153309000  | 0.653808000  |
| C | -5.429435000 | 1.089330000  | 1.211120000  |
| C | -4.543381000 | -0.155235000 | -1.377121000 |
| H | -5.008351000 | 0.547737000  | -2.080658000 |
| H | -4.007470000 | -0.902485000 | -1.972041000 |
| C | -4.334998000 | 1.685230000  | 0.300067000  |

|   |              |              |              |
|---|--------------|--------------|--------------|
| H | -3.647237000 | 2.267941000  | 0.922155000  |
| H | -4.797427000 | 2.380457000  | -0.412391000 |
| C | -5.649147000 | -0.873016000 | -0.575473000 |
| C | 2.145395000  | 2.191005000  | -2.344261000 |
| H | 1.901136000  | 3.117997000  | -1.824750000 |
| H | 2.166582000  | 2.436033000  | -3.414965000 |
| C | -0.036789000 | -2.714695000 | -0.911145000 |
| H | -0.067212000 | -3.678068000 | -1.436863000 |
| H | -1.035054000 | -2.271956000 | -0.982959000 |
| C | 0.347828000  | -1.140565000 | -2.725599000 |
| H | -0.705929000 | -0.945040000 | -2.523016000 |
| H | 0.376248000  | -1.827118000 | -3.582729000 |
| C | -4.826805000 | 0.451643000  | 2.481969000  |
| H | -5.615954000 | -0.051458000 | 3.047932000  |
| H | -4.386792000 | 1.230655000  | 3.113692000  |
| H | -4.045779000 | -0.279957000 | 2.256140000  |
| C | -6.404729000 | 2.206679000  | 1.618245000  |
| H | -6.900433000 | 2.629461000  | 0.738044000  |
| H | -5.851713000 | 3.006199000  | 2.122076000  |
| H | -7.168621000 | 1.824939000  | 2.298336000  |
| C | 3.996099000  | -2.019843000 | 1.392230000  |
| H | 5.022009000  | -2.409870000 | 1.398315000  |
| H | 3.341882000  | -2.814882000 | 1.762569000  |
| C | -6.792280000 | -1.253778000 | -1.531199000 |
| H | -6.398701000 | -1.882365000 | -2.336655000 |
| H | -7.239674000 | -0.359094000 | -1.976745000 |
| H | -7.571424000 | -1.805837000 | -1.002275000 |
| C | 4.888981000  | 0.496419000  | -0.307454000 |
| H | 5.188893000  | 0.559638000  | 0.739329000  |
| H | 5.730790000  | 0.888267000  | -0.894304000 |
| C | 4.663158000  | -0.957901000 | -0.709599000 |
| H | 4.436627000  | -1.016250000 | -1.774868000 |
| H | 5.604695000  | -1.506553000 | -0.565629000 |
| C | -5.115014000 | -2.146667000 | 0.114621000  |
| H | -4.852890000 | -2.894719000 | -0.641231000 |
| H | -5.890846000 | -2.564091000 | 0.762663000  |
| H | -4.225105000 | -1.956092000 | 0.721933000  |
| C | 3.112701000  | -2.842679000 | -0.726257000 |
| H | 2.612840000  | -3.519082000 | -0.032063000 |
| H | 3.978771000  | -3.391679000 | -1.120205000 |
| C | 3.535304000  | 1.701153000  | -1.943134000 |
| H | 3.798550000  | 0.817940000  | -2.526637000 |
| H | 4.266190000  | 2.476640000  | -2.212813000 |
| C | 3.837562000  | -0.873537000 | 2.376983000  |
| C | 2.193335000  | -2.505992000 | -1.898124000 |
| H | 2.726505000  | -1.888857000 | -2.622157000 |
| H | 1.941994000  | -3.440963000 | -2.418694000 |
| C | 1.057735000  | 0.149920000  | -3.122936000 |
| H | 2.091755000  | -0.062922000 | -3.398345000 |
| H | 0.575576000  | 0.545143000  | -4.028099000 |
| O | 2.972565000  | 0.016695000  | 2.173587000  |
| O | 0.310985000  | 0.523477000  | 2.436328000  |

|   |              |              |             |
|---|--------------|--------------|-------------|
| H | 0.976422000  | 0.644692000  | 3.137354000 |
| H | -0.186454000 | 1.358648000  | 2.397524000 |
| N | 4.597797000  | -0.874215000 | 3.462429000 |
| H | 5.303399000  | -1.581113000 | 3.625051000 |
| H | 4.462896000  | -0.163934000 | 4.173066000 |

**-65°**

|   |              |              |              |
|---|--------------|--------------|--------------|
| Y | 1.499544000  | 0.061184000  | 0.328547000  |
| O | -0.760266000 | 0.364488000  | -0.161408000 |
| O | 0.804072000  | -1.996973000 | 1.230009000  |
| O | -7.300158000 | -0.346954000 | 1.033733000  |
| O | 1.424480000  | 2.397848000  | 0.705549000  |
| N | -6.219570000 | 0.052067000  | 0.462724000  |
| N | 1.070385000  | 1.194762000  | -2.056402000 |
| N | 3.674315000  | 1.349780000  | -0.497468000 |
| N | -2.513762000 | 1.231438000  | -1.308877000 |
| H | -2.802849000 | 1.820927000  | -2.082659000 |
| N | 0.942989000  | -1.784733000 | -1.516779000 |
| N | 3.559032000  | -1.637133000 | 0.029601000  |
| N | 2.346116000  | 4.448212000  | 0.928516000  |
| H | 1.461690000  | 4.847074000  | 1.222157000  |
| H | 3.148907000  | 5.061534000  | 0.873314000  |
| N | -0.233548000 | -4.001169000 | 1.157008000  |
| H | -0.145264000 | -4.116221000 | 2.160088000  |
| H | -0.693856000 | -4.734037000 | 0.633065000  |
| C | -0.245354000 | 1.870852000  | -1.963693000 |
| H | -0.672875000 | 2.073258000  | -2.954169000 |
| H | -0.109111000 | 2.833463000  | -1.461838000 |
| C | -3.568676000 | 0.617106000  | -0.487353000 |
| H | -3.046841000 | -0.059350000 | 0.190641000  |
| C | -1.212229000 | 1.086713000  | -1.089476000 |
| C | 0.219193000  | -2.896037000 | 0.578495000  |
| C | 3.792092000  | 2.570980000  | 0.332576000  |
| H | 4.448835000  | 3.318943000  | -0.129525000 |
| H | 4.233686000  | 2.299830000  | 1.296687000  |
| C | 2.427589000  | 3.152732000  | 0.657453000  |
| C | -5.429259000 | 1.088256000  | 1.211836000  |
| C | -4.544666000 | -0.155972000 | -1.377115000 |
| H | -5.010122000 | 0.546957000  | -2.080366000 |
| H | -4.009009000 | -0.903119000 | -1.972400000 |
| C | -4.335527000 | 1.684343000  | 0.300114000  |
| H | -3.647394000 | 2.267130000  | 0.921725000  |
| H | -4.798558000 | 2.379540000  | -0.412000000 |
| C | -5.649875000 | -0.873929000 | -0.574841000 |
| C | 2.143295000  | 2.192793000  | -2.344514000 |
| H | 1.898207000  | 3.119170000  | -1.824175000 |
| H | 2.164516000  | 2.438777000  | -3.414999000 |
| C | -0.036374000 | -2.713533000 | -0.908209000 |
| H | -0.064698000 | -3.679242000 | -1.429735000 |
| H | -1.035103000 | -2.272516000 | -0.983648000 |
| C | 0.347448000  | -1.140749000 | -2.725432000 |

|   |              |              |              |
|---|--------------|--------------|--------------|
| H | -0.706360000 | -0.945682000 | -2.523081000 |
| H | 0.376316000  | -1.827332000 | -3.582500000 |
| C | -4.825697000 | 0.450550000  | 2.482241000  |
| H | -5.614432000 | -0.052513000 | 3.048814000  |
| H | -4.385134000 | 1.229551000  | 3.113597000  |
| H | -4.044855000 | -0.281057000 | 2.255807000  |
| C | -6.404452000 | 2.205423000  | 1.619702000  |
| H | -6.900789000 | 2.628230000  | 0.739867000  |
| H | -5.851207000 | 3.004965000  | 2.123250000  |
| H | -7.167850000 | 1.823517000  | 2.300254000  |
| C | 4.000042000  | -2.023573000 | 1.387553000  |
| H | 5.025932000  | -2.413712000 | 1.390561000  |
| H | 3.346841000  | -2.819215000 | 1.758486000  |
| C | -6.793617000 | -1.254663000 | -1.529846000 |
| H | -6.400505000 | -1.883105000 | -2.335646000 |
| H | -7.241375000 | -0.359958000 | -1.974985000 |
| H | -7.572376000 | -1.806864000 | -1.000501000 |
| C | 4.886860000  | 0.496778000  | -0.309603000 |
| H | 5.187664000  | 0.558970000  | 0.736954000  |
| H | 5.728002000  | 0.889605000  | -0.896710000 |
| C | 4.661316000  | -0.957256000 | -0.713605000 |
| H | 4.432698000  | -1.013998000 | -1.778501000 |
| H | 5.603773000  | -1.505097000 | -0.572528000 |
| C | -5.115211000 | -2.147617000 | 0.114782000  |
| H | -4.853363000 | -2.895513000 | -0.641323000 |
| H | -5.890646000 | -2.565268000 | 0.763155000  |
| H | -4.225022000 | -1.956992000 | 0.721664000  |
| C | 3.112331000  | -2.844095000 | -0.728885000 |
| H | 2.612135000  | -3.519960000 | -0.034235000 |
| H | 3.977807000  | -3.393861000 | -1.123121000 |
| C | 3.533352000  | 1.703762000  | -1.943356000 |
| H | 3.797715000  | 0.821589000  | -2.527897000 |
| H | 4.263792000  | 2.480189000  | -2.211393000 |
| C | 3.843292000  | -0.878687000 | 2.373678000  |
| C | 2.192274000  | -2.507037000 | -1.899731000 |
| H | 2.724966000  | -1.890334000 | -2.624465000 |
| H | 1.939578000  | -3.441825000 | -2.419958000 |
| C | 1.057247000  | 0.149961000  | -3.123104000 |
| H | 2.091445000  | -0.062785000 | -3.397965000 |
| H | 0.575336000  | 0.544427000  | -4.028728000 |
| O | 2.976300000  | 0.010297000  | 2.172997000  |
| O | 0.315826000  | 0.537169000  | 2.439550000  |
| H | 0.983351000  | 0.528887000  | 3.149205000  |
| H | -0.042395000 | 1.442100000  | 2.431519000  |
| N | 4.606359000  | -0.879022000 | 3.457071000  |
| H | 5.313340000  | -1.585086000 | 3.617376000  |
| H | 4.472649000  | -0.169139000 | 4.168344000  |

**-75°**

|   |              |             |              |
|---|--------------|-------------|--------------|
| Y | 1.499858000  | 0.061712000 | 0.327734000  |
| O | -0.760991000 | 0.354752000 | -0.170169000 |



|   |              |              |              |
|---|--------------|--------------|--------------|
| O | 0.799675000  | -1.987494000 | 1.236667000  |
| O | -7.301698000 | -0.344932000 | 1.035341000  |
| O | 1.424048000  | 2.396489000  | 0.712963000  |
| N | -6.221121000 | 0.052787000  | 0.463378000  |
| N | 1.069106000  | 1.193061000  | -2.057423000 |
| N | 3.672647000  | 1.350308000  | -0.500414000 |
| N | -2.515598000 | 1.228638000  | -1.311107000 |
| H | -2.804878000 | 1.821605000  | -2.082141000 |
| N | 0.944048000  | -1.787298000 | -1.514206000 |
| N | 3.560264000  | -1.638235000 | 0.028335000  |
| N | 2.345236000  | 4.447587000  | 0.929724000  |
| H | 1.461664000  | 4.845893000  | 1.226837000  |
| H | 3.147247000  | 5.061655000  | 0.870831000  |
| N | -0.236966000 | -3.992068000 | 1.168693000  |
| H | -0.151677000 | -4.102594000 | 2.172566000  |
| H | -0.695495000 | -4.727470000 | 0.646696000  |
| C | -0.247398000 | 1.867775000  | -1.966395000 |
| H | -0.673817000 | 2.069913000  | -2.957422000 |
| H | -0.113111000 | 2.830539000  | -1.464250000 |
| C | -3.570262000 | 0.615031000  | -0.488838000 |
| H | -3.048335000 | -0.061249000 | 0.189267000  |
| C | -1.213828000 | 1.081280000  | -1.093990000 |
| C | 0.217031000  | -2.889602000 | 0.586615000  |
| C | 3.790660000  | 2.571196000  | 0.330187000  |
| H | 4.445933000  | 3.320018000  | -0.132523000 |
| H | 4.234279000  | 2.299740000  | 1.293305000  |
| C | 2.426906000  | 3.152341000  | 0.659502000  |
| C | -5.429635000 | 1.089061000  | 1.211110000  |
| C | -4.547403000 | -0.158033000 | -1.377334000 |
| H | -5.012736000 | 0.544694000  | -2.080866000 |
| H | -4.012727000 | -0.906069000 | -1.972384000 |
| C | -4.335928000 | 1.683393000  | 0.298272000  |
| H | -3.647004000 | 2.266241000  | 0.918937000  |
| H | -4.798864000 | 2.378305000  | -0.414200000 |
| C | -5.652694000 | -0.874476000 | -0.573790000 |
| C | 2.140470000  | 2.192358000  | -2.346259000 |
| H | 1.894629000  | 3.118154000  | -1.825046000 |
| H | 2.160483000  | 2.439018000  | -3.416614000 |
| C | -0.035017000 | -2.714074000 | -0.901835000 |
| H | -0.061498000 | -3.682551000 | -1.418270000 |
| H | -1.034101000 | -2.274615000 | -0.981014000 |
| C | 0.348092000  | -1.144675000 | -2.723573000 |
| H | -0.705970000 | -0.950606000 | -2.522161000 |
| H | 0.378231000  | -1.831925000 | -3.580046000 |
| C | -4.825924000 | 0.452126000  | 2.481812000  |
| H | -5.614779000 | -0.049647000 | 3.049374000  |
| H | -4.384233000 | 1.231369000  | 3.112076000  |
| H | -4.045879000 | -0.280404000 | 2.255642000  |
| C | -6.403730000 | 2.207395000  | 1.618430000  |
| H | -6.900140000 | 2.629805000  | 0.738443000  |
| H | -5.849578000 | 3.006944000  | 2.120966000  |
| H | -7.167127000 | 1.826754000  | 2.299700000  |

|   |              |              |              |
|---|--------------|--------------|--------------|
| C | 4.005092000  | -2.023912000 | 1.385111000  |
| H | 5.030912000  | -2.414244000 | 1.385526000  |
| H | 3.352935000  | -2.819298000 | 1.758533000  |
| C | -6.797254000 | -1.255204000 | -1.527817000 |
| H | -6.405046000 | -1.884637000 | -2.333281000 |
| H | -7.244584000 | -0.360553000 | -1.973502000 |
| H | -7.576135000 | -1.806351000 | -0.997555000 |
| C | 4.885586000  | 0.497178000  | -0.314017000 |
| H | 5.188176000  | 0.559561000  | 0.731972000  |
| H | 5.725663000  | 0.890055000  | -0.902574000 |
| C | 4.659859000  | -0.957084000 | -0.717707000 |
| H | 4.428424000  | -1.013680000 | -1.781993000 |
| H | 5.603216000  | -1.504064000 | -0.579290000 |
| C | -5.118516000 | -2.147955000 | 0.116581000  |
| H | -4.857640000 | -2.896677000 | -0.639044000 |
| H | -5.893838000 | -2.564519000 | 0.765795000  |
| H | -4.227824000 | -1.957409000 | 0.722749000  |
| C | 3.112985000  | -2.846320000 | -0.727740000 |
| H | 2.612661000  | -3.520525000 | -0.031404000 |
| H | 3.977986000  | -3.397327000 | -1.121339000 |
| C | 3.531193000  | 1.704869000  | -1.946145000 |
| H | 3.796378000  | 0.823323000  | -2.531248000 |
| H | 4.260727000  | 2.482204000  | -2.213880000 |
| C | 3.850632000  | -0.877897000 | 2.369839000  |
| C | 2.192093000  | -2.510947000 | -1.898018000 |
| H | 2.724142000  | -1.895751000 | -2.624468000 |
| H | 1.938159000  | -3.446428000 | -2.416388000 |
| C | 1.057246000  | 0.146302000  | -3.122397000 |
| H | 2.091755000  | -0.066223000 | -3.396309000 |
| H | 0.575641000  | 0.539035000  | -4.028949000 |
| O | 2.982050000  | 0.009577000  | 2.170099000  |
| O | 0.313726000  | 0.551461000  | 2.438200000  |
| H | 0.951094000  | 0.412918000  | 3.162034000  |
| H | 0.104102000  | 1.502134000  | 2.463282000  |
| N | 4.616981000  | -0.875651000 | 3.450993000  |
| H | 5.325062000  | -1.580792000 | 3.610482000  |
| H | 4.484870000  | -0.164518000 | 4.161307000  |

**-85°**

|   |              |              |              |
|---|--------------|--------------|--------------|
| Y | 1.500445000  | 0.061764000  | 0.328965000  |
| O | -0.762068000 | 0.345101000  | -0.178982000 |
| O | 0.796379000  | -1.980260000 | 1.244736000  |
| O | -7.304060000 | -0.343455000 | 1.034541000  |
| O | 1.428374000  | 2.392978000  | 0.727456000  |
| N | -6.223276000 | 0.054035000  | 0.462806000  |
| N | 1.067616000  | 1.192447000  | -2.056871000 |
| N | 3.672762000  | 1.349959000  | -0.505430000 |
| N | -2.517413000 | 1.229667000  | -1.311071000 |
| H | -2.806501000 | 1.827703000  | -2.078226000 |
| N | 0.943785000  | -1.789134000 | -1.510559000 |
| N | 3.560915000  | -1.640088000 | 0.026214000  |

|   |              |              |              |
|---|--------------|--------------|--------------|
| N | 2.348669000  | 4.445429000  | 0.932351000  |
| H | 1.466830000  | 4.842838000  | 1.235921000  |
| H | 3.149193000  | 5.060740000  | 0.865979000  |
| N | -0.240219000 | -3.984688000 | 1.179749000  |
| H | -0.156896000 | -4.092288000 | 2.184131000  |
| H | -0.697997000 | -4.721532000 | 0.659078000  |
| C | -0.248951000 | 1.866807000  | -1.966867000 |
| H | -0.674147000 | 2.069969000  | -2.958274000 |
| H | -0.115709000 | 2.829226000  | -1.463675000 |
| C | -3.572088000 | 0.615477000  | -0.489467000 |
| H | -3.050277000 | -0.061681000 | 0.187859000  |
| C | -1.215388000 | 1.077841000  | -1.096998000 |
| C | 0.214798000  | -2.884095000 | 0.595353000  |
| C | 3.792564000  | 2.570297000  | 0.325774000  |
| H | 4.444748000  | 3.320467000  | -0.139030000 |
| H | 4.240794000  | 2.298495000  | 1.286665000  |
| C | 2.430350000  | 3.150189000  | 0.663784000  |
| C | -5.430917000 | 1.089044000  | 1.211365000  |
| C | -4.549972000 | -0.156266000 | -1.378362000 |
| H | -5.014895000 | 0.547402000  | -2.081227000 |
| H | -4.015896000 | -0.904111000 | -1.974196000 |
| C | -4.337058000 | 1.683458000  | 0.298815000  |
| H | -3.647667000 | 2.265435000  | 0.919777000  |
| H | -4.799766000 | 2.379236000  | -0.412982000 |
| C | -5.655646000 | -0.872654000 | -0.575320000 |
| C | 2.137720000  | 2.192440000  | -2.347152000 |
| H | 1.892561000  | 3.117291000  | -1.823672000 |
| H | 2.154966000  | 2.440940000  | -3.417153000 |
| C | -0.035555000 | -2.713122000 | -0.894161000 |
| H | -0.062549000 | -3.683599000 | -1.406765000 |
| H | -1.034376000 | -2.273437000 | -0.974947000 |
| C | 0.347164000  | -1.147282000 | -2.720217000 |
| H | -0.707025000 | -0.954055000 | -2.519311000 |
| H | 0.378155000  | -1.834949000 | -3.576300000 |
| C | -4.827253000 | 0.450454000  | 2.481266000  |
| H | -5.616332000 | -0.051020000 | 3.048784000  |
| H | -4.384455000 | 1.228728000  | 3.111954000  |
| H | -4.048044000 | -0.282647000 | 2.254071000  |
| C | -6.404110000 | 2.207645000  | 1.620103000  |
| H | -6.900502000 | 2.631308000  | 0.740708000  |
| H | -5.849240000 | 3.006295000  | 2.123281000  |
| H | -7.167561000 | 1.826856000  | 2.301232000  |
| C | 4.009784000  | -2.023845000 | 1.382005000  |
| H | 5.034719000  | -2.416562000 | 1.379589000  |
| H | 3.357179000  | -2.816935000 | 1.759581000  |
| C | -6.800652000 | -1.251694000 | -1.529472000 |
| H | -6.409043000 | -1.880677000 | -2.335579000 |
| H | -7.247396000 | -0.356310000 | -1.974279000 |
| H | -7.579866000 | -1.802743000 | -0.999593000 |
| C | 4.885532000  | 0.495772000  | -0.321902000 |
| H | 5.191869000  | 0.558908000  | 0.722869000  |
| H | 5.723914000  | 0.887335000  | -0.913734000 |

|   |              |              |              |
|---|--------------|--------------|--------------|
| C | 4.657711000  | -0.958820000 | -0.723837000 |
| H | 4.422499000  | -1.015725000 | -1.787276000 |
| H | 5.601623000  | -1.505676000 | -0.588550000 |
| C | -5.122232000 | -2.147118000 | 0.113841000  |
| H | -4.861827000 | -2.895296000 | -0.642491000 |
| H | -5.897783000 | -2.563817000 | 0.762697000  |
| H | -4.231396000 | -1.957654000 | 0.720153000  |
| C | 3.112132000  | -2.849255000 | -0.726722000 |
| H | 2.612077000  | -3.521608000 | -0.028251000 |
| H | 3.976131000  | -3.401861000 | -1.120368000 |
| C | 3.529346000  | 1.705389000  | -1.950551000 |
| H | 3.793931000  | 0.824406000  | -2.536789000 |
| H | 4.258081000  | 2.483232000  | -2.218948000 |
| C | 3.860898000  | -0.873974000 | 2.362984000  |
| C | 2.189714000  | -2.515206000 | -1.895906000 |
| H | 2.721038000  | -1.901961000 | -2.624522000 |
| H | 1.933466000  | -3.451270000 | -2.412078000 |
| C | 1.055862000  | 0.143871000  | -3.120206000 |
| H | 2.090393000  | -0.068847000 | -3.393860000 |
| H | 0.574168000  | 0.535276000  | -4.027304000 |
| O | 2.992818000  | 0.013209000  | 2.163029000  |
| O | 0.303187000  | 0.558260000  | 2.431967000  |
| H | 0.858590000  | 0.280854000  | 3.182208000  |
| H | 0.242805000  | 1.527836000  | 2.506353000  |
| N | 4.632320000  | -0.868269000 | 3.440944000  |
| H | 5.340122000  | -1.573665000 | 3.600324000  |
| H | 4.504286000  | -0.153918000 | 4.148721000  |

**-95°**

|   |              |              |              |
|---|--------------|--------------|--------------|
| Y | 1.500509000  | 0.062408000  | 0.330693000  |
| O | -0.763594000 | 0.335900000  | -0.188170000 |
| O | 0.789754000  | -1.972841000 | 1.251834000  |
| O | -7.305823000 | -0.339048000 | 1.034404000  |
| O | 1.438149000  | 2.388102000  | 0.742639000  |
| N | -6.224772000 | 0.057955000  | 0.462812000  |
| N | 1.067015000  | 1.191969000  | -2.055524000 |
| N | 3.675607000  | 1.348065000  | -0.511699000 |
| N | -2.518693000 | 1.232089000  | -1.311782000 |
| H | -2.807263000 | 1.835793000  | -2.074643000 |
| N | 0.941623000  | -1.790853000 | -1.507287000 |
| N | 3.559483000  | -1.642611000 | 0.024443000  |
| N | 2.358251000  | 4.441212000  | 0.937777000  |
| H | 1.478636000  | 4.837546000  | 1.249199000  |
| H | 3.157224000  | 5.057680000  | 0.863558000  |
| N | -0.247119000 | -3.976998000 | 1.189224000  |
| H | -0.165590000 | -4.082222000 | 2.194026000  |
| H | -0.703896000 | -4.715180000 | 0.669518000  |
| C | -0.249185000 | 1.866964000  | -1.966368000 |
| H | -0.672601000 | 2.072644000  | -2.958068000 |
| H | -0.116280000 | 2.828268000  | -1.460845000 |
| C | -3.573602000 | 0.617065000  | -0.491242000 |

|   |              |              |              |
|---|--------------|--------------|--------------|
| H | -3.052265000 | -0.063551000 | 0.182964000  |
| C | -1.216582000 | 1.075382000  | -1.100261000 |
| C | 0.209261000  | -2.878236000 | 0.602886000  |
| C | 3.799245000  | 2.567874000  | 0.319559000  |
| H | 4.447263000  | 3.319363000  | -0.148893000 |
| H | 4.254198000  | 2.296014000  | 1.277239000  |
| C | 2.439183000  | 3.146218000  | 0.668799000  |
| C | -5.429067000 | 1.088450000  | 1.214034000  |
| C | -4.554398000 | -0.149526000 | -1.381314000 |
| H | -5.018954000 | 0.557595000  | -2.080962000 |
| H | -4.022755000 | -0.896328000 | -1.980626000 |
| C | -4.335258000 | 1.683762000  | 0.301968000  |
| H | -3.643763000 | 2.262131000  | 0.923952000  |
| H | -4.797564000 | 2.382959000  | -0.406739000 |
| C | -5.660328000 | -0.866464000 | -0.579109000 |
| C | 2.136415000  | 2.192085000  | -2.347455000 |
| H | 1.893108000  | 3.115787000  | -1.820814000 |
| H | 2.150037000  | 2.443032000  | -3.416956000 |
| C | -0.039141000 | -2.711131000 | -0.887575000 |
| H | -0.067710000 | -3.683338000 | -1.396765000 |
| H | -1.037177000 | -2.270017000 | -0.969805000 |
| C | 0.345578000  | -1.149048000 | -2.717381000 |
| H | -0.708767000 | -0.956115000 | -2.517650000 |
| H | 0.377542000  | -1.836792000 | -3.573355000 |
| C | -4.824930000 | 0.443953000  | 2.480745000  |
| H | -5.614342000 | -0.057373000 | 3.047944000  |
| H | -4.378980000 | 1.218912000  | 3.113294000  |
| H | -4.048049000 | -0.290398000 | 2.249735000  |
| C | -6.399132000 | 2.207671000  | 1.628454000  |
| H | -6.896391000 | 2.635338000  | 0.751498000  |
| H | -5.841524000 | 3.003431000  | 2.133180000  |
| H | -7.162003000 | 1.826254000  | 2.309899000  |
| C | 4.011935000  | -2.023702000 | 1.379681000  |
| H | 5.035669000  | -2.419573000 | 1.374874000  |
| H | 3.358292000  | -2.813733000 | 1.761937000  |
| C | -6.807364000 | -1.240213000 | -1.532903000 |
| H | -6.417988000 | -1.867178000 | -2.341650000 |
| H | -7.253078000 | -0.342529000 | -1.974103000 |
| H | -7.586874000 | -1.791617000 | -1.003826000 |
| C | 4.886954000  | 0.491191000  | -0.331559000 |
| H | 5.197987000  | 0.555137000  | 0.711695000  |
| H | 5.723837000  | 0.879725000  | -0.927507000 |
| C | 4.654413000  | -0.963581000 | -0.730495000 |
| H | 4.414802000  | -1.021060000 | -1.792909000 |
| H | 5.597884000  | -1.511997000 | -0.598352000 |
| C | -5.128416000 | -2.144174000 | 0.105185000  |
| H | -4.870042000 | -2.890225000 | -0.653946000 |
| H | -5.904037000 | -2.561751000 | 0.753405000  |
| H | -4.236629000 | -1.958333000 | 0.711240000  |
| C | 3.108182000  | -2.853154000 | -0.724399000 |
| H | 2.607535000  | -3.522536000 | -0.023385000 |
| H | 3.970844000  | -3.408477000 | -1.117233000 |

|   |             |              |              |
|---|-------------|--------------|--------------|
| C | 3.528988000 | 1.704187000  | -1.956014000 |
| H | 3.791588000 | 0.823498000  | -2.543634000 |
| H | 4.257206000 | 2.481948000  | -2.226048000 |
| C | 3.869869000 | -0.869157000 | 2.356263000  |
| C | 2.185038000 | -2.520467000 | -1.893173000 |
| H | 2.716382000 | -1.909945000 | -2.624036000 |
| H | 1.926096000 | -3.457230000 | -2.406737000 |
| C | 1.054828000 | 0.141942000  | -3.117626000 |
| H | 2.089296000 | -0.071636000 | -3.390777000 |
| H | 0.573655000 | 0.532844000  | -4.025240000 |
| O | 3.004498000 | 0.019543000  | 2.155244000  |
| O | 0.291551000 | 0.557289000  | 2.424874000  |
| H | 0.733744000 | 0.140993000  | 3.185343000  |
| H | 0.366956000 | 1.516440000  | 2.578275000  |
| N | 4.645626000 | -0.861538000 | 3.431615000  |
| H | 5.351768000 | -1.568468000 | 3.591260000  |
| H | 4.522803000 | -0.143586000 | 4.136602000  |

**-105°**

|   |              |              |              |
|---|--------------|--------------|--------------|
| Y | 1.500820000  | 0.062879000  | 0.332810000  |
| O | -0.765073000 | 0.325476000  | -0.197759000 |
| O | 0.788405000  | -1.970741000 | 1.256062000  |
| O | -7.308807000 | -0.334283000 | 1.034315000  |
| O | 1.442589000  | 2.379719000  | 0.760774000  |
| N | -6.227443000 | 0.061338000  | 0.462346000  |
| N | 1.066044000  | 1.192037000  | -2.054504000 |
| N | 3.676330000  | 1.350926000  | -0.517238000 |
| N | -2.520648000 | 1.231516000  | -1.313314000 |
| H | -2.808782000 | 1.840275000  | -2.072283000 |
| N | 0.943729000  | -1.792703000 | -1.505045000 |
| N | 3.561450000  | -1.639766000 | 0.023512000  |
| N | 2.355278000  | 4.436703000  | 0.944969000  |
| H | 1.476786000  | 4.829048000  | 1.264500000  |
| H | 3.150390000  | 5.057015000  | 0.861913000  |
| N | -0.245656000 | -3.976216000 | 1.193405000  |
| H | -0.165122000 | -4.080554000 | 2.198407000  |
| H | -0.700910000 | -4.715439000 | 0.673797000  |
| C | -0.250862000 | 1.865488000  | -1.967008000 |
| H | -0.672546000 | 2.072310000  | -2.959266000 |
| H | -0.120014000 | 2.826309000  | -1.459903000 |
| C | -3.575799000 | 0.616971000  | -0.492983000 |
| H | -3.054933000 | -0.064646000 | 0.180583000  |
| C | -1.218353000 | 1.070753000  | -1.104244000 |
| C | 0.209908000  | -2.877578000 | 0.606647000  |
| C | 3.799670000  | 2.570403000  | 0.314483000  |
| H | 4.440054000  | 3.325941000  | -0.157914000 |
| H | 4.263310000  | 2.300061000  | 1.268342000  |
| C | 2.439667000  | 3.141851000  | 0.675942000  |
| C | -5.429949000 | 1.090524000  | 1.213448000  |
| C | -4.558227000 | -0.147990000 | -1.382678000 |
| H | -5.022161000 | 0.560015000  | -2.081846000 |

|   |              |              |              |
|---|--------------|--------------|--------------|
| H | -4.027976000 | -0.895320000 | -1.982575000 |
| C | -4.335636000 | 1.684343000  | 0.301101000  |
| H | -3.642996000 | 2.261531000  | 0.922911000  |
| H | -4.797210000 | 2.384466000  | -0.407195000 |
| C | -5.664721000 | -0.863608000 | -0.580062000 |
| C | 2.133048000  | 2.194201000  | -2.347470000 |
| H | 1.889895000  | 3.116110000  | -1.817315000 |
| H | 2.142911000  | 2.448056000  | -3.416353000 |
| C | -0.037346000 | -2.711828000 | -0.884185000 |
| H | -0.066346000 | -3.684671000 | -1.392112000 |
| H | -1.035112000 | -2.270225000 | -0.966778000 |
| C | 0.348047000  | -1.151460000 | -2.715718000 |
| H | -0.706874000 | -0.960584000 | -2.517593000 |
| H | 0.382556000  | -1.838966000 | -3.571783000 |
| C | -4.826223000 | 0.444911000  | 2.479784000  |
| H | -5.616130000 | -0.055273000 | 3.047306000  |
| H | -4.378733000 | 1.219080000  | 3.112214000  |
| H | -4.050597000 | -0.290594000 | 2.248219000  |
| C | -6.398175000 | 2.211116000  | 1.628505000  |
| H | -6.895226000 | 2.639633000  | 0.751842000  |
| H | -5.839136000 | 3.005995000  | 2.133040000  |
| H | -7.161277000 | 1.830754000  | 2.310283000  |
| C | 4.017031000  | -2.016967000 | 1.378746000  |
| H | 5.039706000  | -2.415639000 | 1.372293000  |
| H | 3.362394000  | -2.803802000 | 1.765946000  |
| C | -6.812738000 | -1.235685000 | -1.533320000 |
| H | -6.424592000 | -1.863014000 | -2.342372000 |
| H | -7.257478000 | -0.337333000 | -1.974150000 |
| H | -7.592722000 | -1.786144000 | -1.003956000 |
| C | 4.888117000  | 0.494233000  | -0.339915000 |
| H | 5.203534000  | 0.559910000  | 0.701802000  |
| H | 5.722764000  | 0.881292000  | -0.939978000 |
| C | 4.653904000  | -0.961253000 | -0.735571000 |
| H | 4.410804000  | -1.020040000 | -1.797115000 |
| H | 5.597788000  | -1.509547000 | -0.605674000 |
| C | -5.134129000 | -2.142123000 | 0.103764000  |
| H | -4.876880000 | -2.888316000 | -0.655610000 |
| H | -5.910032000 | -2.558925000 | 0.752150000  |
| H | -4.241918000 | -1.957460000 | 0.709567000  |
| C | 3.110536000  | -2.852647000 | -0.721387000 |
| H | 2.610540000  | -3.520162000 | -0.018065000 |
| H | 3.973232000  | -3.408788000 | -1.113066000 |
| C | 3.527077000  | 1.707683000  | -1.960686000 |
| H | 3.789449000  | 0.827830000  | -2.549706000 |
| H | 4.253687000  | 2.486587000  | -2.231802000 |
| C | 3.881075000  | -0.857039000 | 2.350031000  |
| C | 2.186573000  | -2.523301000 | -1.890368000 |
| H | 2.717233000  | -1.914582000 | -2.623222000 |
| H | 1.927268000  | -3.461367000 | -2.401371000 |
| C | 1.055815000  | 0.140697000  | -3.115517000 |
| H | 2.090748000  | -0.071959000 | -3.387571000 |
| H | 0.574974000  | 0.530299000  | -4.023899000 |

|   |             |              |             |
|---|-------------|--------------|-------------|
| O | 3.019526000 | 0.033695000  | 2.145702000 |
| O | 0.278697000 | 0.530391000  | 2.420559000 |
| H | 0.575794000 | -0.027686000 | 3.159924000 |
| H | 0.461198000 | 1.447187000  | 2.692815000 |
| N | 4.659482000 | -0.847246000 | 3.423964000 |
| H | 5.363237000 | -1.556031000 | 3.585600000 |
| H | 4.540966000 | -0.125267000 | 4.125501000 |

**-115°**

|   |              |              |              |
|---|--------------|--------------|--------------|
| Y | 1.501393000  | 0.063882000  | 0.333726000  |
| O | -0.765549000 | 0.319835000  | -0.203133000 |
| O | 0.784850000  | -1.971146000 | 1.255447000  |
| O | -7.311047000 | -0.331081000 | 1.033302000  |
| O | 1.444259000  | 2.372383000  | 0.774565000  |
| N | -6.229171000 | 0.063960000  | 0.461887000  |
| N | 1.065870000  | 1.195222000  | -2.052803000 |
| N | 3.676673000  | 1.354881000  | -0.518657000 |
| N | -2.521534000 | 1.233091000  | -1.312560000 |
| H | -2.809441000 | 1.845662000  | -2.068520000 |
| N | 0.945825000  | -1.791762000 | -1.506581000 |
| N | 3.562558000  | -1.636355000 | 0.021527000  |
| N | 2.349948000  | 4.432417000  | 0.955823000  |
| H | 1.471601000  | 4.820858000  | 1.280424000  |
| H | 3.141900000  | 5.056110000  | 0.868299000  |
| N | -0.245024000 | -3.978560000 | 1.188482000  |
| H | -0.165886000 | -4.083854000 | 2.193524000  |
| H | -0.697844000 | -4.718235000 | 0.667352000  |
| C | -0.251839000 | 1.866881000  | -1.965881000 |
| H | -0.672676000 | 2.074587000  | -2.958353000 |
| H | -0.122778000 | 2.827299000  | -1.457481000 |
| C | -3.576911000 | 0.618035000  | -0.493022000 |
| H | -3.056428000 | -0.064938000 | 0.179453000  |
| C | -1.219113000 | 1.069459000  | -1.105439000 |
| C | 0.209400000  | -2.878708000 | 0.603633000  |
| C | 3.798681000  | 2.573060000  | 0.315185000  |
| H | 4.433409000  | 3.332467000  | -0.158627000 |
| H | 4.268106000  | 2.302802000  | 1.266158000  |
| C | 2.437915000  | 3.138033000  | 0.684754000  |
| C | -5.430602000 | 1.091378000  | 1.214228000  |
| C | -4.560237000 | -0.144967000 | -1.383410000 |
| H | -5.023624000 | 0.564311000  | -2.081652000 |
| H | -4.030797000 | -0.892072000 | -1.984315000 |
| C | -4.335593000 | 1.685053000  | 0.302626000  |
| H | -3.642268000 | 2.260641000  | 0.925156000  |
| H | -4.796383000 | 2.386637000  | -0.404744000 |
| C | -5.667294000 | -0.860461000 | -0.581457000 |
| C | 2.131020000  | 2.199529000  | -2.344799000 |
| H | 1.887416000  | 3.119498000  | -1.811305000 |
| H | 2.138745000  | 2.456561000  | -3.412958000 |
| C | -0.035759000 | -2.711344000 | -0.887280000 |
| H | -0.064620000 | -3.683693000 | -1.396155000 |



|   |              |              |              |
|---|--------------|--------------|--------------|
| H | -1.033364000 | -2.269407000 | -0.970007000 |
| C | 0.350923000  | -1.149088000 | -2.716992000 |
| H | -0.704426000 | -0.959742000 | -2.519953000 |
| H | 0.387300000  | -1.835251000 | -3.574052000 |
| C | -4.827590000 | 0.443682000  | 2.479841000  |
| H | -5.618031000 | -0.056239000 | 3.046857000  |
| H | -4.379198000 | 1.216657000  | 3.113095000  |
| H | -4.052784000 | -0.292417000 | 2.247417000  |
| C | -6.397612000 | 2.212545000  | 1.630564000  |
| H | -6.894396000 | 2.642416000  | 0.754412000  |
| H | -5.837633000 | 3.006364000  | 2.135724000  |
| H | -7.160971000 | 1.832360000  | 2.312160000  |
| C | 4.020007000  | -2.012646000 | 1.376388000  |
| H | 5.041944000  | -2.413242000 | 1.368537000  |
| H | 3.364598000  | -2.797749000 | 1.765860000  |
| C | -6.815672000 | -1.230645000 | -1.535011000 |
| H | -6.428083000 | -1.857525000 | -2.344677000 |
| H | -7.259651000 | -0.331492000 | -1.974975000 |
| H | -7.596126000 | -1.780937000 | -1.006164000 |
| C | 4.888867000  | 0.498390000  | -0.343956000 |
| H | 5.207078000  | 0.564185000  | 0.696820000  |
| H | 5.722057000  | 0.885160000  | -0.946252000 |
| C | 4.653631000  | -0.957117000 | -0.739173000 |
| H | 4.408391000  | -1.015405000 | -1.800236000 |
| H | 5.597679000  | -1.505613000 | -0.611264000 |
| C | -5.137764000 | -2.140077000 | 0.101119000  |
| H | -4.881039000 | -2.885717000 | -0.658976000 |
| H | -5.914046000 | -2.556917000 | 0.749033000  |
| H | -4.245450000 | -1.956725000 | 0.707181000  |
| C | 3.112640000  | -2.850163000 | -0.722321000 |
| H | 2.612801000  | -3.517245000 | -0.018416000 |
| H | 3.975753000  | -3.406238000 | -1.113205000 |
| C | 3.526046000  | 1.713997000  | -1.961101000 |
| H | 3.788937000  | 0.835649000  | -2.552169000 |
| H | 4.251342000  | 2.494355000  | -2.231584000 |
| C | 3.888237000  | -0.850223000 | 2.345464000  |
| C | 2.188705000  | -2.522214000 | -1.891676000 |
| H | 2.719110000  | -1.913823000 | -2.624986000 |
| H | 1.929781000  | -3.460758000 | -2.401992000 |
| C | 1.057774000  | 0.144379000  | -3.114459000 |
| H | 2.093177000  | -0.067086000 | -3.385587000 |
| H | 0.577515000  | 0.534226000  | -4.023066000 |
| O | 3.030320000  | 0.042898000  | 2.139118000  |
| O | 0.274594000  | 0.491403000  | 2.422529000  |
| H | 0.435241000  | -0.191066000 | 3.096811000  |
| H | 0.544490000  | 1.334976000  | 2.825324000  |
| N | 4.667419000  | -0.841116000 | 3.419192000  |
| H | 5.368810000  | -1.551967000 | 3.581807000  |
| H | 4.551913000  | -0.117218000 | 4.119206000  |

-125°

|   |              |              |              |
|---|--------------|--------------|--------------|
| Y | 1.501953000  | 0.065117000  | 0.333608000  |
| O | -0.765187000 | 0.316800000  | -0.205749000 |
| O | 0.776750000  | -1.972137000 | 1.252744000  |
| O | -7.311133000 | -0.327203000 | 1.033336000  |
| O | 1.446041000  | 2.369098000  | 0.779232000  |
| N | -6.228991000 | 0.067280000  | 0.462033000  |
| N | 1.067455000  | 1.196546000  | -2.052117000 |
| N | 3.678141000  | 1.356413000  | -0.518144000 |
| N | -2.520687000 | 1.234580000  | -1.312258000 |
| H | -2.808189000 | 1.849235000  | -2.066671000 |
| N | 0.946700000  | -1.791363000 | -1.508823000 |
| N | 3.561294000  | -1.634452000 | 0.022660000  |
| N | 2.348517000  | 4.430335000  | 0.961253000  |
| H | 1.470085000  | 4.816836000  | 1.287869000  |
| H | 3.139306000  | 5.055407000  | 0.873271000  |
| N | -0.248717000 | -3.981636000 | 1.180922000  |
| H | -0.172128000 | -4.087669000 | 2.186107000  |
| H | -0.698928000 | -4.721642000 | 0.657970000  |
| C | -0.250713000 | 1.867370000  | -1.965303000 |
| H | -0.671100000 | 2.075666000  | -2.957856000 |
| H | -0.122355000 | 2.827469000  | -1.456109000 |
| C | -3.576446000 | 0.619708000  | -0.493151000 |
| H | -3.056493000 | -0.064361000 | 0.178597000  |
| C | -1.218319000 | 1.068879000  | -1.106083000 |
| C | 0.205080000  | -2.880593000 | 0.598278000  |
| C | 3.799575000  | 2.574278000  | 0.316247000  |
| H | 4.431652000  | 3.335292000  | -0.158526000 |
| H | 4.271626000  | 2.304544000  | 1.266013000  |
| C | 2.438230000  | 3.136183000  | 0.688784000  |
| C | -5.429282000 | 1.093368000  | 1.215012000  |
| C | -4.560740000 | -0.141664000 | -1.383859000 |
| H | -5.023760000 | 0.568614000  | -2.081333000 |
| H | -4.032142000 | -0.888717000 | -1.985578000 |
| C | -4.333944000 | 1.686735000  | 0.303639000  |
| H | -3.639889000 | 2.261119000  | 0.926464000  |
| H | -4.794228000 | 2.389350000  | -0.403042000 |
| C | -5.668123000 | -0.856869000 | -0.582106000 |
| C | 2.132116000  | 2.201719000  | -2.343052000 |
| H | 1.888359000  | 3.120801000  | -1.808063000 |
| H | 2.139322000  | 2.460297000  | -3.410849000 |
| C | -0.036055000 | -2.711791000 | -0.892905000 |
| H | -0.063655000 | -3.683567000 | -1.402938000 |
| H | -1.033562000 | -2.269925000 | -0.977283000 |
| C | 0.353808000  | -1.147446000 | -2.719552000 |
| H | -0.701911000 | -0.958558000 | -2.524053000 |
| H | 0.391817000  | -1.832635000 | -3.577325000 |
| C | -4.826537000 | 0.444114000  | 2.479959000  |
| H | -5.617333000 | -0.055299000 | 3.046925000  |
| H | -4.377002000 | 1.216132000  | 3.113572000  |
| H | -4.052670000 | -0.292704000 | 2.246703000  |
| C | -6.395086000 | 2.215147000  | 1.632554000  |
| H | -6.891833000 | 2.646095000  | 0.756913000  |

|   |              |              |              |
|---|--------------|--------------|--------------|
| H | -5.834145000 | 3.008089000  | 2.138027000  |
| H | -7.158493000 | 1.835185000  | 2.314216000  |
| C | 4.017400000  | -2.010087000 | 1.378330000  |
| H | 5.038214000  | -2.413539000 | 1.371176000  |
| H | 3.359676000  | -2.792868000 | 1.768640000  |
| C | -6.817048000 | -1.225502000 | -1.535597000 |
| H | -6.430142000 | -1.852060000 | -2.345837000 |
| H | -7.260492000 | -0.325698000 | -1.974769000 |
| H | -7.597751000 | -1.775617000 | -1.006936000 |
| C | 4.889889000  | 0.499412000  | -0.343631000 |
| H | 5.208983000  | 0.565776000  | 0.696797000  |
| H | 5.722919000  | 0.885055000  | -0.946882000 |
| C | 4.653505000  | -0.956286000 | -0.737677000 |
| H | 4.408878000  | -1.015098000 | -1.798849000 |
| H | 5.596959000  | -1.505546000 | -0.608761000 |
| C | -5.139405000 | -2.137385000 | 0.099431000  |
| H | -4.883258000 | -2.882623000 | -0.661258000 |
| H | -5.915912000 | -2.554188000 | 0.747099000  |
| H | -4.246903000 | -1.955131000 | 0.705555000  |
| C | 3.112237000  | -2.848890000 | -0.720842000 |
| H | 2.611079000  | -3.515159000 | -0.017090000 |
| H | 3.975893000  | -3.405514000 | -1.109698000 |
| C | 3.527384000  | 1.716143000  | -1.960317000 |
| H | 3.790284000  | 0.838132000  | -2.551906000 |
| H | 4.252460000  | 2.496761000  | -2.230637000 |
| C | 3.888761000  | -0.845627000 | 2.345488000  |
| C | 2.190366000  | -2.521424000 | -1.891979000 |
| H | 2.721838000  | -1.912819000 | -2.624337000 |
| H | 1.932661000  | -3.460053000 | -2.402744000 |
| C | 1.060790000  | 0.146620000  | -3.114642000 |
| H | 2.096516000  | -0.064355000 | -3.384879000 |
| H | 0.581398000  | 0.537208000  | -4.023407000 |
| O | 3.034342000  | 0.050095000  | 2.136540000  |
| O | 0.271836000  | 0.464393000  | 2.424257000  |
| H | 0.310788000  | -0.306730000 | 3.016461000  |
| H | 0.625397000  | 1.213880000  | 2.933465000  |
| N | 4.667260000  | -0.837288000 | 3.419773000  |
| H | 5.365903000  | -1.550383000 | 3.584333000  |
| H | 4.553433000  | -0.111986000 | 4.118598000  |

**-135°**

|   |              |              |              |
|---|--------------|--------------|--------------|
| Y | 1.502161000  | 0.065861000  | 0.331880000  |
| O | -0.764093000 | 0.317079000  | -0.205723000 |
| O | 0.769389000  | -1.976111000 | 1.246445000  |
| O | -7.309131000 | -0.322817000 | 1.035647000  |
| O | 1.443760000  | 2.367371000  | 0.778877000  |
| N | -6.227308000 | 0.070317000  | 0.462807000  |
| N | 1.070228000  | 1.197184000  | -2.052540000 |
| N | 3.678580000  | 1.358852000  | -0.514568000 |
| N | -2.518976000 | 1.232841000  | -1.314741000 |
| H | -2.806251000 | 1.846413000  | -2.070135000 |

|   |              |              |              |
|---|--------------|--------------|--------------|
| N | 0.949354000  | -1.791156000 | -1.512734000 |
| N | 3.560192000  | -1.630988000 | 0.026405000  |
| N | 2.342245000  | 4.430074000  | 0.963944000  |
| H | 1.462644000  | 4.814743000  | 1.289511000  |
| H | 3.132204000  | 5.056470000  | 0.878132000  |
| N | -0.253282000 | -3.986882000 | 1.168989000  |
| H | -0.179588000 | -4.094031000 | 2.174301000  |
| H | -0.700747000 | -4.726991000 | 0.643797000  |
| C | -0.248946000 | 1.866309000  | -1.966835000 |
| H | -0.668912000 | 2.073644000  | -2.959746000 |
| H | -0.121975000 | 2.826851000  | -1.458128000 |
| C | -3.575065000 | 0.620092000  | -0.494321000 |
| H | -3.055313000 | -0.062219000 | 0.179359000  |
| C | -1.216734000 | 1.067907000  | -1.107495000 |
| C | 0.201102000  | -2.884946000 | 0.589033000  |
| C | 3.797564000  | 2.576873000  | 0.319958000  |
| H | 4.428530000  | 3.339002000  | -0.154519000 |
| H | 4.269581000  | 2.308091000  | 1.269967000  |
| C | 2.434646000  | 3.136053000  | 0.690960000  |
| C | -5.427739000 | 1.098881000  | 1.212524000  |
| C | -4.559353000 | -0.143774000 | -1.382891000 |
| H | -5.022485000 | 0.564429000  | -2.082376000 |
| H | -4.030761000 | -0.892551000 | -1.982473000 |
| C | -4.332469000 | 1.689508000  | 0.299337000  |
| H | -3.638368000 | 2.265729000  | 0.920405000  |
| H | -4.792806000 | 2.390056000  | -0.409367000 |
| C | -5.666587000 | -0.856735000 | -0.578835000 |
| C | 2.134400000  | 2.203614000  | -2.341224000 |
| H | 1.889182000  | 3.122078000  | -1.805875000 |
| H | 2.142806000  | 2.462917000  | -3.408823000 |
| C | -0.034576000 | -2.713921000 | -0.902423000 |
| H | -0.059087000 | -3.684772000 | -1.414385000 |
| H | -1.032409000 | -2.273282000 | -0.989601000 |
| C | 0.359431000  | -1.146222000 | -2.724378000 |
| H | -0.696820000 | -0.957786000 | -2.531038000 |
| H | 0.399659000  | -1.830523000 | -3.582754000 |
| C | -4.824950000 | 0.453691000  | 2.479512000  |
| H | -5.615653000 | -0.044290000 | 3.047861000  |
| H | -4.375800000 | 1.227799000  | 3.110842000  |
| H | -4.050764000 | -0.283528000 | 2.248569000  |
| C | -6.393735000 | 2.221848000  | 1.626425000  |
| H | -6.890356000 | 2.650012000  | 0.749345000  |
| H | -5.832967000 | 3.016432000  | 2.129518000  |
| H | -7.157235000 | 1.843929000  | 2.309107000  |
| C | 4.012905000  | -2.005850000 | 1.383665000  |
| H | 5.033214000  | -2.410526000 | 1.378966000  |
| H | 3.353291000  | -2.787469000 | 1.773156000  |
| C | -6.815713000 | -1.228198000 | -1.530988000 |
| H | -6.428955000 | -1.857062000 | -2.339515000 |
| H | -7.259326000 | -0.329692000 | -1.972628000 |
| H | -7.596234000 | -1.776855000 | -1.000550000 |
| C | 4.890414000  | 0.502478000  | -0.338141000 |

|   |              |              |              |
|---|--------------|--------------|--------------|
| H | 5.208275000  | 0.569603000  | 0.702610000  |
| H | 5.724116000  | 0.887831000  | -0.940651000 |
| C | 4.654687000  | -0.953468000 | -0.731592000 |
| H | 4.412680000  | -1.012910000 | -1.793314000 |
| H | 5.597549000  | -1.503042000 | -0.599934000 |
| C | -5.137645000 | -2.135254000 | 0.106236000  |
| H | -4.881883000 | -2.882753000 | -0.652361000 |
| H | -5.913867000 | -2.550127000 | 0.755479000  |
| H | -4.244871000 | -1.951241000 | 0.711409000  |
| C | 3.113627000  | -2.846191000 | -0.717762000 |
| H | 2.610657000  | -3.512075000 | -0.014964000 |
| H | 3.978711000  | -3.402683000 | -1.103510000 |
| C | 3.529545000  | 1.718702000  | -1.956889000 |
| H | 3.793816000  | 0.840980000  | -2.548293000 |
| H | 4.254456000  | 2.499832000  | -2.226146000 |
| C | 3.883756000  | -0.840266000 | 2.349590000  |
| C | 2.195259000  | -2.519617000 | -1.892037000 |
| H | 2.728409000  | -1.910322000 | -2.622580000 |
| H | 1.940372000  | -3.458480000 | -2.403742000 |
| C | 1.066510000  | 0.148555000  | -3.116382000 |
| H | 2.102927000  | -0.061447000 | -3.384685000 |
| H | 0.588735000  | 0.539995000  | -4.025627000 |
| O | 3.030748000  | 0.056344000  | 2.137962000  |
| O | 0.270773000  | 0.433815000  | 2.428994000  |
| H | 0.209743000  | -0.402725000 | 2.922954000  |
| H | 0.702023000  | 1.068618000  | 3.026378000  |
| N | 4.660231000  | -0.831593000 | 3.425228000  |
| H | 5.357467000  | -1.545530000 | 3.592134000  |
| H | 4.545699000  | -0.105544000 | 4.123182000  |

-5°

|   |              |              |              |
|---|--------------|--------------|--------------|
| Y | 1.511140000  | 0.060575000  | 0.339150000  |
| O | -0.764444000 | 0.352375000  | -0.157377000 |
| O | 0.786504000  | -1.988165000 | 1.246280000  |
| O | -7.306205000 | -0.308332000 | 1.035439000  |
| O | 1.464973000  | 2.396136000  | 0.714170000  |
| N | -6.222152000 | 0.078394000  | 0.462617000  |
| N | 1.078682000  | 1.170030000  | -2.053234000 |
| N | 3.695052000  | 1.335745000  | -0.515956000 |
| N | -2.509162000 | 1.215150000  | -1.321559000 |
| H | -2.793179000 | 1.802958000  | -2.098542000 |
| N | 0.943298000  | -1.804233000 | -1.497962000 |
| N | 3.556158000  | -1.642975000 | 0.053346000  |
| N | 2.388546000  | 4.449172000  | 0.896016000  |
| H | 1.508900000  | 4.850322000  | 1.200706000  |
| H | 3.189700000  | 5.062508000  | 0.820619000  |
| N | -0.243163000 | -3.997069000 | 1.187679000  |
| H | -0.158577000 | -4.102633000 | 2.192128000  |
| H | -0.699026000 | -4.736109000 | 0.668502000  |
| C | -0.235582000 | 1.849814000  | -1.963468000 |
| H | -0.658867000 | 2.056550000  | -2.954784000 |

|   |              |              |              |
|---|--------------|--------------|--------------|
| H | -0.096801000 | 2.810634000  | -1.458464000 |
| C | -3.569607000 | 0.608864000  | -0.500583000 |
| H | -3.055825000 | -0.087368000 | 0.163345000  |
| C | -1.210025000 | 1.070644000  | -1.093574000 |
| C | 0.208032000  | -2.895701000 | 0.600847000  |
| C | 3.825708000  | 2.566318000  | 0.297504000  |
| H | 4.474020000  | 3.309299000  | -0.184309000 |
| H | 4.283061000  | 2.307482000  | 1.257465000  |
| C | 2.466761000  | 3.150667000  | 0.638627000  |
| C | -5.407664000 | 1.089351000  | 1.220336000  |
| C | -4.565968000 | -0.133608000 | -1.393129000 |
| H | -5.026223000 | 0.587712000  | -2.081131000 |
| H | -4.048621000 | -0.880739000 | -2.004393000 |
| C | -4.310219000 | 1.678639000  | 0.308492000  |
| H | -3.606708000 | 2.239444000  | 0.933187000  |
| H | -4.765590000 | 2.392332000  | -0.390044000 |
| C | -5.675606000 | -0.844276000 | -0.590368000 |
| C | 2.151694000  | 2.164981000  | -2.354098000 |
| H | 1.913324000  | 3.093578000  | -1.834390000 |
| H | 2.162948000  | 2.407102000  | -3.425584000 |
| C | -0.040224000 | -2.727226000 | -0.887919000 |
| H | -0.065498000 | -3.697433000 | -1.401204000 |
| H | -1.038612000 | -2.287263000 | -0.972742000 |
| C | 0.352541000  | -1.168060000 | -2.712410000 |
| H | -0.701922000 | -0.971649000 | -2.514848000 |
| H | 0.384159000  | -1.859359000 | -3.565652000 |
| C | -4.806046000 | 0.423418000  | 2.477113000  |
| H | -5.599331000 | -0.073356000 | 3.042908000  |
| H | -4.347168000 | 1.185619000  | 3.115884000  |
| H | -4.040181000 | -0.318906000 | 2.234877000  |
| C | -6.359160000 | 2.218128000  | 1.651633000  |
| H | -6.857063000 | 2.659893000  | 0.782102000  |
| H | -5.786845000 | 3.001822000  | 2.158719000  |
| H | -7.121950000 | 1.841342000  | 2.335747000  |
| C | 3.990933000  | -2.006046000 | 1.420028000  |
| H | 5.013398000  | -2.404920000 | 1.432515000  |
| H | 3.330012000  | -2.788553000 | 1.805056000  |
| C | -6.832460000 | -1.195645000 | -1.540734000 |
| H | -6.455234000 | -1.820291000 | -2.356944000 |
| H | -7.269743000 | -0.288891000 | -1.971675000 |
| H | -7.615514000 | -1.742163000 | -1.011880000 |
| C | 4.901766000  | 0.476267000  | -0.322970000 |
| H | 5.210265000  | 0.552486000  | 0.720335000  |
| H | 5.742227000  | 0.852276000  | -0.922016000 |
| C | 4.663273000  | -0.982485000 | -0.701078000 |
| H | 4.433329000  | -1.055118000 | -1.764720000 |
| H | 5.601311000  | -1.535532000 | -0.551315000 |
| C | -5.155724000 | -2.134458000 | 0.079666000  |
| H | -4.907696000 | -2.875865000 | -0.687408000 |
| H | -5.934242000 | -2.549692000 | 0.725923000  |
| H | -4.260377000 | -1.964866000 | 0.685294000  |
| C | 3.105830000  | -2.859069000 | -0.688051000 |

|   |              |              |              |
|---|--------------|--------------|--------------|
| H | 2.599285000  | -3.521734000 | 0.014611000  |
| H | 3.970008000  | -3.419081000 | -1.070445000 |
| C | 3.544210000  | 1.673963000  | -1.963330000 |
| H | 3.799973000  | 0.784891000  | -2.541376000 |
| H | 4.274421000  | 2.445182000  | -2.246793000 |
| C | 3.843688000  | -0.836707000 | 2.380837000  |
| C | 2.192486000  | -2.532695000 | -1.867884000 |
| H | 2.729877000  | -1.924921000 | -2.596609000 |
| H | 1.940533000  | -3.472532000 | -2.379332000 |
| C | 1.063617000  | 0.119588000  | -3.115001000 |
| H | 2.097684000  | -0.096487000 | -3.387239000 |
| H | 0.583589000  | 0.511273000  | -4.022790000 |
| O | 2.994239000  | 0.061254000  | 2.155968000  |
| O | 0.228169000  | 0.539473000  | 2.389872000  |
| H | 0.547507000  | 1.346222000  | 2.830266000  |
| H | -0.686738000 | 0.736520000  | 2.119815000  |
| N | 4.601804000  | -0.826287000 | 3.468913000  |
| H | 5.296653000  | -1.539571000 | 3.648389000  |
| H | 4.474079000  | -0.100232000 | 4.164622000  |

5°

|   |              |              |              |
|---|--------------|--------------|--------------|
| Y | 1.513234000  | 0.061762000  | 0.337847000  |
| O | -0.765945000 | 0.335826000  | -0.168928000 |
| O | 0.773641000  | -1.969939000 | 1.260031000  |
| O | -7.309109000 | -0.292802000 | 1.041055000  |
| O | 1.473342000  | 2.395940000  | 0.721409000  |
| N | -6.224050000 | 0.088017000  | 0.466189000  |
| N | 1.078797000  | 1.160102000  | -2.055807000 |
| N | 3.696909000  | 1.332106000  | -0.524929000 |
| N | -2.510501000 | 1.206001000  | -1.328574000 |
| H | -2.793705000 | 1.797923000  | -2.102680000 |
| N | 0.944342000  | -1.813248000 | -1.489657000 |
| N | 3.555922000  | -1.647429000 | 0.058537000  |
| N | 2.399484000  | 4.448568000  | 0.891690000  |
| H | 1.522462000  | 4.850326000  | 1.203273000  |
| H | 3.200104000  | 5.061755000  | 0.808922000  |
| N | -0.252291000 | -3.980751000 | 1.213251000  |
| H | -0.173160000 | -4.076824000 | 2.219136000  |
| H | -0.703367000 | -4.725743000 | 0.698314000  |
| C | -0.236267000 | 1.838712000  | -1.969364000 |
| H | -0.657501000 | 2.044507000  | -2.961768000 |
| H | -0.099518000 | 2.800189000  | -1.464876000 |
| C | -3.571642000 | 0.602229000  | -0.506817000 |
| H | -3.060290000 | -0.103153000 | 0.149240000  |
| C | -1.211439000 | 1.058280000  | -1.101581000 |
| C | 0.200662000  | -2.884624000 | 0.618694000  |
| C | 3.831509000  | 2.564635000  | 0.285120000  |
| H | 4.476561000  | 3.306853000  | -0.202119000 |
| H | 4.294765000  | 2.308192000  | 1.242889000  |
| C | 2.475486000  | 3.150242000  | 0.635500000  |
| C | -5.396583000 | 1.085694000  | 1.227438000  |

|   |              |              |              |
|---|--------------|--------------|--------------|
| C | -4.578887000 | -0.125328000 | -1.399259000 |
| H | -5.036750000 | 0.604969000  | -2.079413000 |
| H | -4.071218000 | -0.872300000 | -2.018800000 |
| C | -4.299135000 | 1.672242000  | 0.313914000  |
| H | -3.587813000 | 2.222998000  | 0.938715000  |
| H | -4.752287000 | 2.394418000  | -0.377325000 |
| C | -5.690342000 | -0.832212000 | -0.595567000 |
| C | 2.149962000  | 2.155859000  | -2.360760000 |
| H | 1.911825000  | 3.084514000  | -1.840796000 |
| H | 2.157894000  | 2.397136000  | -3.432452000 |
| C | -0.040262000 | -2.730877000 | -0.873060000 |
| H | -0.062592000 | -3.706467000 | -1.376058000 |
| H | -1.038892000 | -2.293255000 | -0.966139000 |
| C | 0.354506000  | -1.181861000 | -2.707250000 |
| H | -0.700479000 | -0.986058000 | -2.512545000 |
| H | 0.388665000  | -1.875950000 | -3.558101000 |
| C | -4.794015000 | 0.404852000  | 2.475738000  |
| H | -5.588662000 | -0.088551000 | 3.042582000  |
| H | -4.324188000 | 1.157878000  | 3.117434000  |
| H | -4.036633000 | -0.342943000 | 2.223732000  |
| C | -6.335625000 | 2.219434000  | 1.672789000  |
| H | -6.835138000 | 2.671629000  | 0.809576000  |
| H | -5.753392000 | 2.994539000  | 2.181750000  |
| H | -7.097343000 | 1.844332000  | 2.359038000  |
| C | 3.994572000  | -2.003889000 | 1.425521000  |
| H | 5.016199000  | -2.405004000 | 1.436800000  |
| H | 3.333476000  | -2.783099000 | 1.817073000  |
| C | -6.854606000 | -1.167885000 | -1.542506000 |
| H | -6.486398000 | -1.790220000 | -2.364559000 |
| H | -7.286559000 | -0.254830000 | -1.965449000 |
| H | -7.639509000 | -1.711514000 | -1.013436000 |
| C | 4.902303000  | 0.470299000  | -0.331809000 |
| H | 5.214629000  | 0.550539000  | 0.709960000  |
| H | 5.741477000  | 0.841698000  | -0.935472000 |
| C | 4.660302000  | -0.989928000 | -0.702704000 |
| H | 4.426088000  | -1.066310000 | -1.765129000 |
| H | 5.598629000  | -1.542968000 | -0.554618000 |
| C | -5.177946000 | -2.131074000 | 0.063428000  |
| H | -4.937451000 | -2.868649000 | -0.709707000 |
| H | -5.957685000 | -2.545313000 | 0.708870000  |
| H | -4.279755000 | -1.972516000 | 0.667828000  |
| C | 3.103857000  | -2.867251000 | -0.675089000 |
| H | 2.595093000  | -3.523952000 | 0.031809000  |
| H | 3.966977000  | -3.431859000 | -1.053176000 |
| C | 3.543783000  | 1.666839000  | -1.972697000 |
| H | 3.799217000  | 0.776760000  | -2.549352000 |
| H | 4.272695000  | 2.438074000  | -2.259271000 |
| C | 3.852394000  | -0.828065000 | 2.378893000  |
| C | 2.191504000  | -2.546074000 | -1.856722000 |
| H | 2.729630000  | -1.943490000 | -2.589153000 |
| H | 1.937494000  | -3.488240000 | -2.362833000 |
| C | 1.065397000  | 0.104964000  | -3.113358000 |



|   |              |              |              |
|---|--------------|--------------|--------------|
| H | 2.099972000  | -0.112015000 | -3.382852000 |
| H | 0.586728000  | 0.493099000  | -4.023384000 |
| O | 3.005850000  | 0.070663000  | 2.148367000  |
| O | 0.224560000  | 0.572110000  | 2.381493000  |
| H | 0.436640000  | 1.477666000  | 2.669716000  |
| H | -0.715086000 | 0.601397000  | 2.126060000  |
| N | 4.611989000  | -0.812795000 | 3.466124000  |
| H | 5.304769000  | -1.527022000 | 3.649691000  |
| H | 4.487399000  | -0.081534000 | 4.156896000  |

15°

|   |              |              |              |
|---|--------------|--------------|--------------|
| Y | 1.513970000  | 0.062056000  | 0.338171000  |
| O | -0.765078000 | 0.329287000  | -0.175388000 |
| O | 0.763741000  | -1.958616000 | 1.268550000  |
| O | -7.309767000 | -0.301903000 | 1.036324000  |
| O | 1.474071000  | 2.394180000  | 0.728077000  |
| N | -6.225621000 | 0.082391000  | 0.462027000  |
| N | 1.078093000  | 1.158997000  | -2.056039000 |
| N | 3.696131000  | 1.332029000  | -0.528679000 |
| N | -2.511249000 | 1.210345000  | -1.325065000 |
| H | -2.794290000 | 1.805271000  | -2.096923000 |
| N | 0.944509000  | -1.815509000 | -1.485638000 |
| N | 3.556319000  | -1.649497000 | 0.058421000  |
| N | 2.401125000  | 4.446217000  | 0.898127000  |
| H | 1.525437000  | 4.847175000  | 1.214574000  |
| H | 3.201221000  | 5.059842000  | 0.813087000  |
| N | -0.255822000 | -3.972498000 | 1.224815000  |
| H | -0.180172000 | -4.064455000 | 2.231390000  |
| H | -0.702587000 | -4.720960000 | 0.711081000  |
| C | -0.237167000 | 1.837301000  | -1.970938000 |
| H | -0.658209000 | 2.041401000  | -2.963819000 |
| H | -0.101004000 | 2.799746000  | -1.468116000 |
| C | -3.572521000 | 0.606926000  | -0.503461000 |
| H | -3.060003000 | -0.089112000 | 0.161688000  |
| C | -1.211679000 | 1.056696000  | -1.102706000 |
| C | 0.196207000  | -2.877673000 | 0.627706000  |
| C | 3.831280000  | 2.564078000  | 0.282139000  |
| H | 4.473842000  | 3.307651000  | -0.206258000 |
| H | 4.297835000  | 2.307287000  | 1.238206000  |
| C | 2.476364000  | 3.148774000  | 0.638973000  |
| C | -5.409039000 | 1.093306000  | 1.217478000  |
| C | -4.570639000 | -0.135272000 | -1.394394000 |
| H | -5.029493000 | 0.585840000  | -2.083546000 |
| H | -4.054815000 | -0.884335000 | -2.004591000 |
| C | -4.311355000 | 1.679261000  | 0.303922000  |
| H | -3.606935000 | 2.240584000  | 0.927087000  |
| H | -4.766272000 | 2.392138000  | -0.395787000 |
| C | -5.681589000 | -0.842461000 | -0.590353000 |
| C | 2.148093000  | 2.155322000  | -2.362584000 |
| H | 1.910112000  | 3.083612000  | -1.841710000 |
| H | 2.154300000  | 2.397066000  | -3.434194000 |

|   |              |              |              |
|---|--------------|--------------|--------------|
| C | -0.040586000 | -2.730415000 | -0.865554000 |
| H | -0.062110000 | -3.708385000 | -1.363831000 |
| H | -1.039130000 | -2.293385000 | -0.962077000 |
| C | 0.354378000  | -1.184978000 | -2.703796000 |
| H | -0.700639000 | -0.989343000 | -2.509556000 |
| H | 0.389002000  | -1.879802000 | -3.554014000 |
| C | -4.807467000 | 0.428547000  | 2.474925000  |
| H | -5.600836000 | -0.067158000 | 3.041541000  |
| H | -4.347986000 | 1.191237000  | 3.112666000  |
| H | -4.042054000 | -0.314468000 | 2.233274000  |
| C | -6.358516000 | 2.224198000  | 1.647739000  |
| H | -6.856249000 | 2.665509000  | 0.777877000  |
| H | -5.784651000 | 3.007704000  | 2.153365000  |
| H | -7.121478000 | 1.849559000  | 2.332838000  |
| C | 3.999046000  | -2.004838000 | 1.424219000  |
| H | 5.019686000  | -2.408587000 | 1.432596000  |
| H | 3.337475000  | -2.781789000 | 1.819583000  |
| C | -6.839707000 | -1.192208000 | -1.539782000 |
| H | -6.464300000 | -1.818529000 | -2.355549000 |
| H | -7.275068000 | -0.284875000 | -1.971462000 |
| H | -7.623787000 | -1.736375000 | -1.010022000 |
| C | 4.901401000  | 0.469323000  | -0.337282000 |
| H | 5.216722000  | 0.550606000  | 0.703388000  |
| H | 5.739141000  | 0.839409000  | -0.943710000 |
| C | 4.657998000  | -0.991388000 | -0.706386000 |
| H | 4.420502000  | -1.068102000 | -1.768044000 |
| H | 5.597009000  | -1.544040000 | -0.561067000 |
| C | -5.164161000 | -2.132990000 | 0.080850000  |
| H | -4.917682000 | -2.875632000 | -0.685533000 |
| H | -5.943313000 | -2.546106000 | 0.727692000  |
| H | -4.268358000 | -1.964384000 | 0.686108000  |
| C | 3.102972000  | -2.870362000 | -0.672268000 |
| H | 2.593680000  | -3.524781000 | 0.036580000  |
| H | 3.965207000  | -3.436935000 | -1.049515000 |
| C | 3.542464000  | 1.667293000  | -1.976171000 |
| H | 3.798230000  | 0.777644000  | -2.553367000 |
| H | 4.270686000  | 2.439164000  | -2.262727000 |
| C | 3.862705000  | -0.825926000 | 2.374316000  |
| C | 2.189923000  | -2.550659000 | -1.853443000 |
| H | 2.727689000  | -1.950111000 | -2.587782000 |
| H | 1.933983000  | -3.493438000 | -2.357416000 |
| C | 1.065227000  | 0.101609000  | -3.111446000 |
| H | 2.099968000  | -0.115806000 | -3.379982000 |
| H | 0.586954000  | 0.487932000  | -4.022477000 |
| O | 3.018503000  | 0.073976000  | 2.142098000  |
| O | 0.236759000  | 0.589482000  | 2.383382000  |
| H | 0.341014000  | 1.543437000  | 2.551373000  |
| H | -0.710866000 | 0.466191000  | 2.196200000  |
| N | 4.625066000  | -0.809226000 | 3.459881000  |
| H | 5.316091000  | -1.524875000 | 3.644372000  |
| H | 4.504215000  | -0.075176000 | 4.148317000  |

**25°**

|   |              |              |              |
|---|--------------|--------------|--------------|
| Y | 1.513996000  | 0.062194000  | 0.339284000  |
| O | -0.764705000 | 0.323452000  | -0.181887000 |
| O | 0.759768000  | -1.953300000 | 1.272967000  |
| O | -7.311176000 | -0.305400000 | 1.034479000  |
| O | 1.468395000  | 2.390761000  | 0.733987000  |
| N | -6.227097000 | 0.079871000  | 0.460682000  |
| N | 1.076550000  | 1.160838000  | -2.056167000 |
| N | 3.692952000  | 1.335268000  | -0.530620000 |
| N | -2.512662000 | 1.211956000  | -1.323527000 |
| H | -2.796044000 | 1.810023000  | -2.092793000 |
| N | 0.946207000  | -1.815516000 | -1.484519000 |
| N | 3.558609000  | -1.648364000 | 0.055486000  |
| N | 2.393073000  | 4.443371000  | 0.907559000  |
| H | 1.517487000  | 4.842162000  | 1.227037000  |
| H | 3.191786000  | 5.058659000  | 0.821448000  |
| N | -0.254972000 | -3.969406000 | 1.228768000  |
| H | -0.181294000 | -4.059953000 | 2.235645000  |
| H | -0.698635000 | -4.719710000 | 0.714986000  |
| C | -0.239447000 | 1.837376000  | -1.972392000 |
| H | -0.660345000 | 2.039862000  | -2.965734000 |
| H | -0.105184000 | 2.800675000  | -1.470696000 |
| C | -3.573407000 | 0.607919000  | -0.502069000 |
| H | -3.059936000 | -0.084780000 | 0.165875000  |
| C | -1.212527000 | 1.054961000  | -1.104383000 |
| C | 0.195966000  | -2.874577000 | 0.631272000  |
| C | 3.825356000  | 2.565834000  | 0.283062000  |
| H | 4.464952000  | 3.312552000  | -0.204379000 |
| H | 4.294145000  | 2.307990000  | 1.237725000  |
| C | 2.469708000  | 3.146901000  | 0.644459000  |
| C | -5.413739000 | 1.094374000  | 1.214737000  |
| C | -4.568510000 | -0.139120000 | -1.392498000 |
| H | -5.027314000 | 0.579029000  | -2.084752000 |
| H | -4.049953000 | -0.888872000 | -1.999533000 |
| C | -4.316264000 | 1.680538000  | 0.301183000  |
| H | -3.614254000 | 2.245534000  | 0.923722000  |
| H | -4.772066000 | 2.390302000  | -0.401143000 |
| C | -5.679727000 | -0.846271000 | -0.588825000 |
| C | 2.144511000  | 2.158924000  | -2.362869000 |
| H | 1.905441000  | 3.086275000  | -1.840661000 |
| H | 2.149585000  | 2.401896000  | -3.434239000 |
| C | -0.038541000 | -2.729768000 | -0.862757000 |
| H | -0.059419000 | -3.708721000 | -1.359072000 |
| H | -1.037204000 | -2.293327000 | -0.960603000 |
| C | 0.355406000  | -1.185010000 | -2.702596000 |
| H | -0.699784000 | -0.990477000 | -2.508628000 |
| H | 0.390963000  | -1.879733000 | -3.552847000 |
| C | -4.812210000 | 0.433770000  | 2.474404000  |
| H | -5.605174000 | -0.062353000 | 3.041216000  |
| H | -4.355083000 | 1.198897000  | 3.110918000  |
| H | -4.044938000 | -0.308166000 | 2.235237000  |

|   |              |              |              |
|---|--------------|--------------|--------------|
| C | -6.366245000 | 2.224174000  | 1.641163000  |
| H | -6.863414000 | 2.662730000  | 0.769575000  |
| H | -5.794835000 | 3.009894000  | 2.146148000  |
| H | -7.129606000 | 1.849375000  | 2.325716000  |
| C | 4.005618000  | -2.004439000 | 1.419576000  |
| H | 5.025548000  | -2.410112000 | 1.424446000  |
| H | 3.344058000  | -2.780140000 | 1.817513000  |
| C | -6.835722000 | -1.199985000 | -1.539391000 |
| H | -6.457985000 | -1.827396000 | -2.353254000 |
| H | -7.271851000 | -0.294267000 | -1.973691000 |
| H | -7.619796000 | -1.744306000 | -1.009768000 |
| C | 4.899557000  | 0.473697000  | -0.341694000 |
| H | 5.217408000  | 0.555012000  | 0.698079000  |
| H | 5.735439000  | 0.844808000  | -0.950045000 |
| C | 4.657056000  | -0.987267000 | -0.711421000 |
| H | 4.416764000  | -1.063013000 | -1.772510000 |
| H | 5.597394000  | -1.538561000 | -0.569342000 |
| C | -5.161151000 | -2.134405000 | 0.086034000  |
| H | -4.913140000 | -2.878642000 | -0.678305000 |
| H | -5.940166000 | -2.546956000 | 0.733394000  |
| H | -4.265950000 | -1.962944000 | 0.691384000  |
| C | 3.105479000  | -2.869722000 | -0.674111000 |
| H | 2.597137000  | -3.523888000 | 0.035803000  |
| H | 3.967547000  | -3.436239000 | -1.051915000 |
| C | 3.539544000  | 1.672954000  | -1.977460000 |
| H | 3.797111000  | 0.784846000  | -2.556248000 |
| H | 4.266526000  | 2.446632000  | -2.262281000 |
| C | 3.874405000  | -0.824157000 | 2.368317000  |
| C | 2.190791000  | -2.551122000 | -1.854001000 |
| H | 2.727347000  | -1.951160000 | -2.589690000 |
| H | 1.933921000  | -3.494228000 | -2.356875000 |
| C | 1.065388000  | 0.102240000  | -3.110417000 |
| H | 2.100517000  | -0.114616000 | -3.377972000 |
| H | 0.587428000  | 0.487154000  | -4.022249000 |
| O | 3.031984000  | 0.076829000  | 2.135885000  |
| O | 0.251504000  | 0.587111000  | 2.389969000  |
| H | 0.240569000  | 1.556829000  | 2.482462000  |
| H | -0.680880000 | 0.324988000  | 2.295952000  |
| N | 4.639409000  | -0.807385000 | 3.452283000  |
| H | 5.329100000  | -1.524343000 | 3.636538000  |
| H | 4.521839000  | -0.071780000 | 4.139591000  |

### 35°

|   |              |              |              |
|---|--------------|--------------|--------------|
| Y | 1.513127000  | 0.063069000  | 0.339661000  |
| O | -0.763873000 | 0.320439000  | -0.189227000 |
| O | 0.754364000  | -1.949898000 | 1.272921000  |
| O | -7.309001000 | -0.307413000 | 1.035923000  |
| O | 1.460164000  | 2.387074000  | 0.737989000  |
| N | -6.225348000 | 0.078384000  | 0.461666000  |
| N | 1.076558000  | 1.165599000  | -2.056247000 |
| N | 3.689626000  | 1.338642000  | -0.527614000 |

|   |              |              |              |
|---|--------------|--------------|--------------|
| N | -2.513045000 | 1.213630000  | -1.325183000 |
| H | -2.797256000 | 1.814469000  | -2.091936000 |
| N | 0.948037000  | -1.812828000 | -1.487086000 |
| N | 3.559451000  | -1.647253000 | 0.052204000  |
| N | 2.382200000  | 4.440123000  | 0.918727000  |
| H | 1.505797000  | 4.836904000  | 1.238437000  |
| H | 3.180180000  | 5.056670000  | 0.835061000  |
| N | -0.255130000 | -3.968366000 | 1.224409000  |
| H | -0.183763000 | -4.059339000 | 2.231438000  |
| H | -0.695495000 | -4.719599000 | 0.709125000  |
| C | -0.240229000 | 1.840465000  | -1.974290000 |
| H | -0.660221000 | 2.042231000  | -2.968196000 |
| H | -0.108192000 | 2.804002000  | -1.472516000 |
| C | -3.572429000 | 0.607928000  | -0.503413000 |
| H | -3.057410000 | -0.085096000 | 0.162985000  |
| C | -1.212429000 | 1.055380000  | -1.107871000 |
| C | 0.194792000  | -2.872393000 | 0.628626000  |
| C | 3.818173000  | 2.566620000  | 0.290734000  |
| H | 4.457136000  | 3.316359000  | -0.192843000 |
| H | 4.285740000  | 2.306048000  | 1.245229000  |
| C | 2.460767000  | 3.144405000  | 0.652091000  |
| C | -5.411361000 | 1.092151000  | 1.216037000  |
| C | -4.568420000 | -0.138681000 | -1.393220000 |
| H | -5.028284000 | 0.579918000  | -2.084310000 |
| H | -4.050392000 | -0.887745000 | -2.001568000 |
| C | -4.314782000 | 1.679281000  | 0.302010000  |
| H | -3.612170000 | 2.243677000  | 0.924428000  |
| H | -4.771394000 | 2.389783000  | -0.399056000 |
| C | -5.678529000 | -0.846874000 | -0.588938000 |
| C | 2.143449000  | 2.165368000  | -2.360279000 |
| H | 1.902515000  | 3.091521000  | -1.836730000 |
| H | 2.149661000  | 2.410205000  | -3.431242000 |
| C | -0.036886000 | -2.727350000 | -0.865977000 |
| H | -0.056984000 | -3.706400000 | -1.362121000 |
| H | -1.035565000 | -2.291181000 | -0.964920000 |
| C | 0.357866000  | -1.180729000 | -2.704837000 |
| H | -0.697564000 | -0.986990000 | -2.511753000 |
| H | 0.394662000  | -1.874417000 | -3.555871000 |
| C | -4.808739000 | 0.430309000  | 2.474504000  |
| H | -5.601275000 | -0.065857000 | 3.041887000  |
| H | -4.350440000 | 1.194711000  | 3.111047000  |
| H | -4.042146000 | -0.311819000 | 2.233863000  |
| C | -6.363540000 | 2.221421000  | 1.644542000  |
| H | -6.861784000 | 2.660682000  | 0.773927000  |
| H | -5.791629000 | 3.006769000  | 2.149536000  |
| H | -7.126078000 | 1.845994000  | 2.329688000  |
| C | 4.008833000  | -2.006586000 | 1.414555000  |
| H | 5.028454000  | -2.413134000 | 1.416663000  |
| H | 3.347457000  | -2.782498000 | 1.812427000  |
| C | -6.835308000 | -1.200578000 | -1.538536000 |
| H | -6.458048000 | -1.827319000 | -2.353130000 |
| H | -7.272326000 | -0.294832000 | -1.971884000 |

|   |              |              |              |
|---|--------------|--------------|--------------|
| H | -7.618605000 | -1.745602000 | -1.008481000 |
| C | 4.897301000  | 0.478056000  | -0.340676000 |
| H | 5.215758000  | 0.557617000  | 0.698963000  |
| H | 5.732360000  | 0.851411000  | -0.948773000 |
| C | 4.656259000  | -0.982467000 | -0.713949000 |
| H | 4.415054000  | -1.055655000 | -1.775007000 |
| H | 5.597492000  | -1.532865000 | -0.574239000 |
| C | -5.158815000 | -2.135237000 | 0.084655000  |
| H | -4.911146000 | -2.878874000 | -0.680378000 |
| H | -5.937099000 | -2.548539000 | 0.732432000  |
| H | -4.263174000 | -1.963788000 | 0.689340000  |
| C | 3.107142000  | -2.867769000 | -0.679003000 |
| H | 2.598904000  | -3.522936000 | 0.030201000  |
| H | 3.969395000  | -3.433671000 | -1.057383000 |
| C | 3.538352000  | 1.680564000  | -1.973711000 |
| H | 3.798203000  | 0.794508000  | -2.554623000 |
| H | 4.264874000  | 2.456022000  | -2.254865000 |
| C | 3.880425000  | -0.827309000 | 2.364548000  |
| C | 2.192200000  | -2.548184000 | -1.858103000 |
| H | 2.728474000  | -1.947348000 | -2.593287000 |
| H | 1.935067000  | -3.490706000 | -2.361942000 |
| C | 1.067775000  | 0.107380000  | -3.110796000 |
| H | 2.103405000  | -0.108662000 | -3.377128000 |
| H | 0.590766000  | 0.492188000  | -4.023213000 |
| O | 3.039089000  | 0.074535000  | 2.133398000  |
| O | 0.258770000  | 0.577884000  | 2.395119000  |
| H | 0.125012000  | 1.541678000  | 2.438263000  |
| H | -0.632048000 | 0.187041000  | 2.389957000  |
| N | 4.647214000  | -0.812244000 | 3.447531000  |
| H | 5.336178000  | -1.530241000 | 3.630319000  |
| H | 4.531749000  | -0.076819000 | 4.135353000  |

#### 45°

|   |              |              |              |
|---|--------------|--------------|--------------|
| Y | 1.513578000  | 0.064348000  | 0.341019000  |
| O | -0.763407000 | 0.320438000  | -0.191457000 |
| O | 0.753162000  | -1.950438000 | 1.270588000  |
| O | -7.309591000 | -0.314180000 | 1.033125000  |
| O | 1.452298000  | 2.383015000  | 0.744020000  |
| N | -6.225951000 | 0.073875000  | 0.460358000  |
| N | 1.075300000  | 1.173711000  | -2.054207000 |
| N | 3.686436000  | 1.343639000  | -0.523529000 |
| N | -2.514093000 | 1.217974000  | -1.321632000 |
| H | -2.799140000 | 1.821364000  | -2.086055000 |
| N | 0.949692000  | -1.807170000 | -1.491433000 |
| N | 3.561707000  | -1.644852000 | 0.045665000  |
| N | 2.370745000  | 4.436845000  | 0.932854000  |
| H | 1.493292000  | 4.831139000  | 1.252705000  |
| H | 3.167745000  | 5.054980000  | 0.851881000  |
| N | -0.250724000 | -3.971404000 | 1.214458000  |
| H | -0.179929000 | -4.065426000 | 2.221267000  |
| H | -0.688813000 | -4.722138000 | 0.696499000  |

|   |              |              |              |
|---|--------------|--------------|--------------|
| C | -0.242201000 | 1.846679000  | -1.971667000 |
| H | -0.662397000 | 2.048914000  | -2.965445000 |
| H | -0.111778000 | 2.809932000  | -1.468968000 |
| C | -3.572546000 | 0.609578000  | -0.500808000 |
| H | -3.056133000 | -0.081323000 | 0.166738000  |
| C | -1.213019000 | 1.058632000  | -1.106467000 |
| C | 0.196793000  | -2.872565000 | 0.622460000  |
| C | 3.811165000  | 2.568132000  | 0.300756000  |
| H | 4.449563000  | 3.321325000  | -0.178142000 |
| H | 4.277404000  | 2.303802000  | 1.254845000  |
| C | 2.451761000  | 3.141959000  | 0.662159000  |
| C | -5.416063000 | 1.090669000  | 1.215073000  |
| C | -4.565252000 | -0.140652000 | -1.391345000 |
| H | -5.025806000 | 0.575999000  | -2.083981000 |
| H | -4.044248000 | -0.888951000 | -1.998096000 |
| C | -4.319038000 | 1.679499000  | 0.302667000  |
| H | -3.618830000 | 2.245937000  | 0.925956000  |
| H | -4.775937000 | 2.388522000  | -0.399718000 |
| C | -5.674857000 | -0.850981000 | -0.588330000 |
| C | 2.140979000  | 2.175478000  | -2.354779000 |
| H | 1.898481000  | 3.099862000  | -1.828787000 |
| H | 2.147849000  | 2.423423000  | -3.425057000 |
| C | -0.034612000 | -2.723388000 | -0.871881000 |
| H | -0.055066000 | -3.701175000 | -1.370509000 |
| H | -1.033301000 | -2.286801000 | -0.969052000 |
| C | 0.358800000  | -1.172041000 | -2.707398000 |
| H | -0.696681000 | -0.979408000 | -2.513686000 |
| H | 0.395816000  | -1.863640000 | -3.560111000 |
| C | -4.814388000 | 0.431889000  | 2.475590000  |
| H | -5.606817000 | -0.065712000 | 3.041851000  |
| H | -4.359462000 | 1.198258000  | 3.112188000  |
| H | -4.045283000 | -0.308404000 | 2.237383000  |
| C | -6.372011000 | 2.218054000  | 1.640171000  |
| H | -6.869373000 | 2.655111000  | 0.767939000  |
| H | -5.803220000 | 3.005410000  | 2.145573000  |
| H | -7.135164000 | 1.841493000  | 2.324004000  |
| C | 4.014076000  | -2.009705000 | 1.405501000  |
| H | 5.033403000  | -2.417046000 | 1.403747000  |
| H | 3.353044000  | -2.786514000 | 1.802219000  |
| C | -6.829098000 | -1.208706000 | -1.539512000 |
| H | -6.448829000 | -1.835271000 | -2.352851000 |
| H | -7.267757000 | -0.304543000 | -1.974503000 |
| H | -7.611876000 | -1.755244000 | -1.010243000 |
| C | 4.895742000  | 0.484494000  | -0.340413000 |
| H | 5.215292000  | 0.561059000  | 0.699044000  |
| H | 5.729484000  | 0.861345000  | -0.948153000 |
| C | 4.656518000  | -0.975124000 | -0.719115000 |
| H | 4.414093000  | -1.044406000 | -1.780160000 |
| H | 5.598834000  | -1.524535000 | -0.582783000 |
| C | -5.152902000 | -2.137262000 | 0.087503000  |
| H | -4.902394000 | -2.881197000 | -0.676317000 |
| H | -5.931016000 | -2.551725000 | 0.734741000  |

|   |              |              |              |
|---|--------------|--------------|--------------|
| H | -4.258479000 | -1.962853000 | 0.693137000  |
| C | 3.109979000  | -2.863383000 | -0.689063000 |
| H | 2.602959000  | -3.521196000 | 0.018659000  |
| H | 3.972353000  | -3.427445000 | -1.069958000 |
| C | 3.536072000  | 1.691484000  | -1.968398000 |
| H | 3.798055000  | 0.808272000  | -2.552681000 |
| H | 4.261755000  | 2.469215000  | -2.245405000 |
| C | 3.888577000  | -0.833157000 | 2.358877000  |
| C | 2.193530000  | -2.541224000 | -1.866037000 |
| H | 2.728688000  | -1.938118000 | -2.600178000 |
| H | 1.936115000  | -3.482476000 | -2.372099000 |
| C | 1.068030000  | 0.117501000  | -3.110534000 |
| H | 2.103904000  | -0.097171000 | -3.377088000 |
| H | 0.590943000  | 0.503422000  | -4.022481000 |
| O | 3.047075000  | 0.069129000  | 2.131550000  |
| O | 0.267191000  | 0.556294000  | 2.403506000  |
| H | 0.004672000  | 1.493499000  | 2.417172000  |
| H | -0.557137000 | 0.045697000  | 2.477156000  |
| N | 4.658240000  | -0.820841000 | 3.440045000  |
| H | 5.347274000  | -1.539590000 | 3.619477000  |
| H | 4.544803000  | -0.086936000 | 4.129804000  |

## 55°

|   |              |              |              |
|---|--------------|--------------|--------------|
| Y | 1.514523000  | 0.065254000  | 0.343078000  |
| O | -0.763008000 | 0.326775000  | -0.186850000 |
| O | 0.757006000  | -1.955456000 | 1.265574000  |
| O | -7.310831000 | -0.322868000 | 1.029078000  |
| O | 1.444613000  | 2.378995000  | 0.750649000  |
| N | -6.227166000 | 0.068238000  | 0.458411000  |
| N | 1.073377000  | 1.184740000  | -2.050343000 |
| N | 3.683349000  | 1.349176000  | -0.518512000 |
| N | -2.515070000 | 1.222883000  | -1.316086000 |
| H | -2.800905000 | 1.826755000  | -2.079838000 |
| N | 0.949701000  | -1.798574000 | -1.497362000 |
| N | 3.564235000  | -1.642154000 | 0.035859000  |
| N | 2.359977000  | 4.433080000  | 0.950454000  |
| H | 1.481350000  | 4.824838000  | 1.270133000  |
| H | 3.155990000  | 5.052828000  | 0.872478000  |
| N | -0.244768000 | -3.977153000 | 1.199706000  |
| H | -0.172575000 | -4.076571000 | 2.205917000  |
| H | -0.683301000 | -4.725337000 | 0.678427000  |
| C | -0.244412000 | 1.856572000  | -1.964727000 |
| H | -0.665667000 | 2.061296000  | -2.957559000 |
| H | -0.114364000 | 2.818457000  | -1.459404000 |
| C | -3.572941000 | 0.611557000  | -0.496759000 |
| H | -3.055454000 | -0.076762000 | 0.172645000  |
| C | -1.213657000 | 1.065360000  | -1.100847000 |
| C | 0.200599000  | -2.874793000 | 0.613023000  |
| C | 3.804523000  | 2.569524000  | 0.312515000  |
| H | 4.442489000  | 3.326350000  | -0.161184000 |
| H | 4.269477000  | 2.300719000  | 1.265974000  |



|   |              |              |              |
|---|--------------|--------------|--------------|
| C | 2.443162000  | 3.139335000  | 0.674176000  |
| C | -5.422524000 | 1.088516000  | 1.213962000  |
| C | -4.561111000 | -0.142917000 | -1.388844000 |
| H | -5.022006000 | 0.571472000  | -2.083566000 |
| H | -4.036237000 | -0.890298000 | -1.993377000 |
| C | -4.324917000 | 1.679802000  | 0.303817000  |
| H | -3.628071000 | 2.249049000  | 0.928310000  |
| H | -4.782199000 | 2.386757000  | -0.400401000 |
| C | -5.670613000 | -0.855825000 | -0.588035000 |
| C | 2.138248000  | 2.188237000  | -2.347167000 |
| H | 1.894910000  | 3.110661000  | -1.818134000 |
| H | 2.145484000  | 2.439943000  | -3.416582000 |
| C | -0.033528000 | -2.717422000 | -0.880085000 |
| H | -0.056160000 | -3.692542000 | -1.383845000 |
| H | -1.032068000 | -2.279324000 | -0.972339000 |
| C | 0.356870000  | -1.158747000 | -2.709994000 |
| H | -0.698230000 | -0.966508000 | -2.513798000 |
| H | 0.392111000  | -1.847461000 | -3.565103000 |
| C | -4.822087000 | 0.433004000  | 2.476767000  |
| H | -5.614473000 | -0.066281000 | 3.041602000  |
| H | -4.370980000 | 1.201462000  | 3.113560000  |
| H | -4.050248000 | -0.305279000 | 2.241240000  |
| C | -6.383141000 | 2.213361000  | 1.635205000  |
| H | -6.879025000 | 2.648341000  | 0.761087000  |
| H | -5.818341000 | 3.002781000  | 2.141868000  |
| H | -7.147363000 | 1.835007000  | 2.316846000  |
| C | 4.019511000  | -2.014771000 | 1.392565000  |
| H | 5.038629000  | -2.422634000 | 1.386432000  |
| H | 3.358910000  | -2.793227000 | 1.786745000  |
| C | -6.821403000 | -1.217916000 | -1.541746000 |
| H | -6.437300000 | -1.844178000 | -2.353525000 |
| H | -7.261634000 | -0.315472000 | -1.978720000 |
| H | -7.603907000 | -1.766206000 | -1.013868000 |
| C | 4.894423000  | 0.491495000  | -0.340315000 |
| H | 5.214876000  | 0.563692000  | 0.699129000  |
| H | 5.726866000  | 0.872875000  | -0.947011000 |
| C | 4.657290000  | -0.966702000 | -0.726439000 |
| H | 4.413981000  | -1.030896000 | -1.787621000 |
| H | 5.600628000  | -1.515271000 | -0.593823000 |
| C | -5.146387000 | -2.139856000 | 0.090322000  |
| H | -4.892709000 | -2.884100000 | -0.672144000 |
| H | -5.924422000 | -2.555532000 | 0.736873000  |
| H | -4.253373000 | -1.962217000 | 0.697091000  |
| C | 3.112411000  | -2.857246000 | -0.704441000 |
| H | 2.607733000  | -3.519432000 | 0.000921000  |
| H | 3.974584000  | -3.418380000 | -1.090127000 |
| C | 3.533378000  | 1.704003000  | -1.961830000 |
| H | 3.796629000  | 0.823867000  | -2.550164000 |
| H | 4.258638000  | 2.483670000  | -2.234480000 |
| C | 3.896584000  | -0.842804000 | 2.351576000  |
| C | 2.193062000  | -2.530466000 | -1.877745000 |
| H | 2.726361000  | -1.923685000 | -2.610228000 |

|   |              |              |              |
|---|--------------|--------------|--------------|
| H | 1.935035000  | -3.469584000 | -2.387454000 |
| C | 1.065689000  | 0.132144000  | -3.109919000 |
| H | 2.101280000  | -0.081281000 | -3.378656000 |
| H | 0.587318000  | 0.520619000  | -4.020128000 |
| O | 3.054312000  | 0.060001000  | 2.130033000  |
| O | 0.278260000  | 0.528914000  | 2.415652000  |
| H | -0.113801000 | 1.419328000  | 2.403117000  |
| H | -0.458797000 | -0.088883000 | 2.560623000  |
| N | 4.669290000  | -0.834782000 | 3.430681000  |
| H | 5.358837000  | -1.554231000 | 3.605206000  |
| H | 4.557621000  | -0.103835000 | 4.123855000  |

**65°**

|   |              |              |              |
|---|--------------|--------------|--------------|
| Y | 1.515401000  | 0.066359000  | 0.343589000  |
| O | -0.762024000 | 0.334507000  | -0.181786000 |
| O | 0.761026000  | -1.963030000 | 1.257480000  |
| O | -7.310728000 | -0.330146000 | 1.026458000  |
| O | 1.435853000  | 2.376434000  | 0.755765000  |
| N | -6.227153000 | 0.063355000  | 0.457265000  |
| N | 1.072709000  | 1.196232000  | -2.046585000 |
| N | 3.680240000  | 1.355588000  | -0.509893000 |
| N | -2.515362000 | 1.226801000  | -1.312027000 |
| H | -2.802075000 | 1.830228000  | -2.075824000 |
| N | 0.951701000  | -1.789657000 | -1.505063000 |
| N | 3.566764000  | -1.638293000 | 0.027561000  |
| N | 2.347796000  | 4.430889000  | 0.967568000  |
| H | 1.467413000  | 4.820377000  | 1.285103000  |
| H | 3.143321000  | 5.051848000  | 0.894868000  |
| N | -0.238276000 | -3.985588000 | 1.179834000  |
| H | -0.164668000 | -4.091436000 | 2.185306000  |
| H | -0.676120000 | -4.731217000 | 0.654314000  |
| C | -0.245876000 | 1.866145000  | -1.959021000 |
| H | -0.667814000 | 2.072311000  | -2.951253000 |
| H | -0.116996000 | 2.827178000  | -1.451836000 |
| C | -3.572623000 | 0.613006000  | -0.493718000 |
| H | -3.054219000 | -0.073263000 | 0.177077000  |
| C | -1.213729000 | 1.072231000  | -1.096108000 |
| C | 0.205144000  | -2.879228000 | 0.599631000  |
| C | 3.797348000  | 2.571651000  | 0.328087000  |
| H | 4.436545000  | 3.331436000  | -0.139138000 |
| H | 4.258765000  | 2.297891000  | 1.281858000  |
| C | 2.433565000  | 3.138069000  | 0.686690000  |
| C | -5.426799000 | 1.086743000  | 1.213119000  |
| C | -4.557202000 | -0.145103000 | -1.386770000 |
| H | -5.018732000 | 0.567282000  | -2.083109000 |
| H | -4.029246000 | -0.891729000 | -1.989548000 |
| C | -4.328964000 | 1.679932000  | 0.304497000  |
| H | -3.634793000 | 2.251608000  | 0.929743000  |
| H | -4.786687000 | 2.385049000  | -0.401274000 |
| C | -5.666223000 | -0.860195000 | -0.587262000 |
| C | 2.136889000  | 2.201926000  | -2.337863000 |
| H | 1.891566000  | 3.122197000  | -1.806071000 |

|   |              |              |              |
|---|--------------|--------------|--------------|
| H | 2.145955000  | 2.457470000  | -3.406364000 |
| C | -0.030781000 | -2.712155000 | -0.892087000 |
| H | -0.054854000 | -3.683924000 | -1.402214000 |
| H | -1.029252000 | -2.272842000 | -0.979795000 |
| C | 0.357936000  | -1.144788000 | -2.714679000 |
| H | -0.697007000 | -0.953241000 | -2.516790000 |
| H | 0.392249000  | -1.830213000 | -3.572446000 |
| C | -4.827076000 | 0.434338000  | 2.477870000  |
| H | -5.619230000 | -0.066332000 | 3.041791000  |
| H | -4.379186000 | 1.204753000  | 3.114574000  |
| H | -4.052861000 | -0.302171000 | 2.244645000  |
| C | -6.391330000 | 2.209485000  | 1.631002000  |
| H | -6.886352000 | 2.642269000  | 0.755302000  |
| H | -5.829812000 | 3.000930000  | 2.138157000  |
| H | -7.156114000 | 1.829788000  | 2.311256000  |
| C | 4.023305000  | -2.018626000 | 1.381711000  |
| H | 5.043092000  | -2.424782000 | 1.372649000  |
| H | 3.364140000  | -2.800476000 | 1.771513000  |
| C | -6.814337000 | -1.226354000 | -1.542649000 |
| H | -6.427169000 | -1.852471000 | -2.353092000 |
| H | -7.256178000 | -0.325537000 | -1.981344000 |
| H | -7.596325000 | -1.776141000 | -1.015562000 |
| C | 4.893141000  | 0.499693000  | -0.335527000 |
| H | 5.212694000  | 0.566742000  | 0.704544000  |
| H | 5.725154000  | 0.886404000  | -0.939416000 |
| C | 4.658890000  | -0.956648000 | -0.730543000 |
| H | 4.415905000  | -1.014986000 | -1.792146000 |
| H | 5.603121000  | -1.504395000 | -0.600973000 |
| C | -5.139740000 | -2.142123000 | 0.093337000  |
| H | -4.883309000 | -2.886690000 | -0.667890000 |
| H | -5.917568000 | -2.558876000 | 0.739433000  |
| H | -4.247923000 | -1.961536000 | 0.700983000  |
| C | 3.116446000  | -2.849991000 | -0.719258000 |
| H | 2.613628000  | -3.517047000 | -0.017148000 |
| H | 3.979252000  | -3.407479000 | -1.108809000 |
| C | 3.531822000  | 1.717808000  | -1.951827000 |
| H | 3.797430000  | 0.841079000  | -2.544139000 |
| H | 4.256582000  | 2.499780000  | -2.219073000 |
| C | 3.898782000  | -0.852702000 | 2.347589000  |
| C | 2.195454000  | -2.518799000 | -1.889950000 |
| H | 2.727485000  | -1.908044000 | -2.620062000 |
| H | 1.937761000  | -3.455784000 | -2.403700000 |
| C | 1.066336000  | 0.147800000  | -3.110031000 |
| H | 2.102057000  | -0.063824000 | -3.379727000 |
| H | 0.587630000  | 0.539120000  | -4.018849000 |
| O | 3.053930000  | 0.049123000  | 2.131960000  |
| O | 0.280856000  | 0.493146000  | 2.425188000  |
| H | -0.248006000 | 1.308514000  | 2.386721000  |
| H | -0.345339000 | -0.225616000 | 2.619700000  |
| N | 4.672616000  | -0.848772000 | 3.425872000  |
| H | 5.364486000  | -1.567215000 | 3.595273000  |
| H | 4.560160000  | -0.121819000 | 4.123114000  |

75°

|   |              |              |              |
|---|--------------|--------------|--------------|
| Y | 1.515903000  | 0.067288000  | 0.341535000  |
| O | -0.761016000 | 0.339592000  | -0.179328000 |
| O | 0.769281000  | -1.974135000 | 1.247473000  |
| O | -7.307868000 | -0.333956000 | 1.027542000  |
| O | 1.426292000  | 2.374895000  | 0.755734000  |
| N | -6.224919000 | 0.060741000  | 0.458006000  |
| N | 1.073948000  | 1.205349000  | -2.044698000 |
| N | 3.677438000  | 1.362490000  | -0.498877000 |
| N | -2.514576000 | 1.228008000  | -1.311910000 |
| H | -2.802031000 | 1.830775000  | -2.075993000 |
| N | 0.955960000  | -1.781954000 | -1.512955000 |
| N | 3.569437000  | -1.632627000 | 0.023322000  |
| N | 2.333379000  | 4.429836000  | 0.983983000  |
| H | 1.450415000  | 4.816336000  | 1.297902000  |
| H | 3.128335000  | 5.052370000  | 0.919303000  |
| N | -0.229477000 | -3.996674000 | 1.158116000  |
| H | -0.154143000 | -4.109333000 | 2.162734000  |
| H | -0.668216000 | -4.738821000 | 0.628411000  |
| C | -0.245713000 | 1.872958000  | -1.956013000 |
| H | -0.667712000 | 2.080714000  | -2.947868000 |
| H | -0.118558000 | 2.833006000  | -1.446590000 |
| C | -3.571309000 | 0.612972000  | -0.493615000 |
| H | -3.052301000 | -0.072989000 | 0.176992000  |
| C | -1.213026000 | 1.076518000  | -1.094803000 |
| C | 0.212299000  | -2.886292000 | 0.584673000  |
| C | 3.789608000  | 2.575736000  | 0.343954000  |
| H | 4.429857000  | 3.337935000  | -0.117842000 |
| H | 4.247356000  | 2.299146000  | 1.298695000  |
| C | 2.422854000  | 3.138353000  | 0.697336000  |
| C | -5.425529000 | 1.085092000  | 1.213586000  |
| C | -4.555238000 | -0.146045000 | -1.386544000 |
| H | -5.017800000 | 0.565815000  | -2.082708000 |
| H | -4.026694000 | -0.892162000 | -1.989426000 |
| C | -4.328430000 | 1.679266000  | 0.304730000  |
| H | -3.634664000 | 2.251567000  | 0.929851000  |
| H | -4.786908000 | 2.383943000  | -0.400968000 |
| C | -5.663196000 | -0.862330000 | -0.586548000 |
| C | 2.137816000  | 2.213172000  | -2.329637000 |
| H | 1.889485000  | 3.131838000  | -1.796590000 |
| H | 2.150491000  | 2.471354000  | -3.397456000 |
| C | -0.025969000 | -2.708537000 | -0.905316000 |
| H | -0.051479000 | -3.676429000 | -1.422655000 |
| H | -1.024293000 | -2.267826000 | -0.988104000 |
| C | 0.362476000  | -1.133625000 | -2.720941000 |
| H | -0.692749000 | -0.943433000 | -2.522933000 |
| H | 0.397580000  | -1.816429000 | -3.580742000 |
| C | -4.824955000 | 0.433596000  | 2.478401000  |
| H | -5.616503000 | -0.067842000 | 3.042486000  |
| H | -4.377905000 | 1.204655000  | 3.114918000  |

|   |              |              |              |
|---|--------------|--------------|--------------|
| H | -4.049943000 | -0.302099000 | 2.245285000  |
| C | -6.391119000 | 2.206962000  | 1.631367000  |
| H | -6.886732000 | 2.639035000  | 0.755655000  |
| H | -5.830318000 | 2.999090000  | 2.138251000  |
| H | -7.155393000 | 1.826642000  | 2.311846000  |
| C | 4.023806000  | -2.018601000 | 1.376782000  |
| H | 5.045591000  | -2.419668000 | 1.368367000  |
| H | 3.367346000  | -2.805801000 | 1.760158000  |
| C | -6.811161000 | -1.229966000 | -1.541549000 |
| H | -6.423505000 | -1.855824000 | -2.351955000 |
| H | -7.254160000 | -0.329743000 | -1.980284000 |
| H | -7.592351000 | -1.780530000 | -1.014093000 |
| C | 4.892107000  | 0.508986000  | -0.325018000 |
| H | 5.207679000  | 0.571258000  | 0.716644000  |
| H | 5.725207000  | 0.901256000  | -0.923792000 |
| C | 4.662425000  | -0.945671000 | -0.728633000 |
| H | 4.422527000  | -0.999226000 | -1.791210000 |
| H | 5.607306000  | -1.492256000 | -0.599136000 |
| C | -5.135138000 | -2.143561000 | 0.094127000  |
| H | -4.877975000 | -2.887953000 | -0.667021000 |
| H | -5.912415000 | -2.561090000 | 0.740387000  |
| H | -4.243468000 | -1.961936000 | 0.701665000  |
| C | 3.122706000  | -2.841802000 | -0.730022000 |
| H | 2.621580000  | -3.513907000 | -0.031628000 |
| H | 3.987267000  | -3.394819000 | -1.121988000 |
| C | 3.532132000  | 1.729704000  | -1.940223000 |
| H | 3.800651000  | 0.855345000  | -2.534643000 |
| H | 4.256745000  | 2.513435000  | -2.202578000 |
| C | 3.891112000  | -0.859560000 | 2.349694000  |
| C | 2.201522000  | -2.507531000 | -1.899697000 |
| H | 2.732970000  | -1.892865000 | -2.626974000 |
| H | 1.945735000  | -3.442882000 | -2.417320000 |
| C | 1.069999000  | 0.160847000  | -3.111766000 |
| H | 2.106148000  | -0.048483000 | -3.381702000 |
| H | 0.591281000  | 0.554498000  | -4.019568000 |
| O | 3.041496000  | 0.039211000  | 2.138700000  |
| O | 0.269046000  | 0.459695000  | 2.428050000  |
| H | -0.397725000 | 1.161589000  | 2.334191000  |
| H | -0.225810000 | -0.345315000 | 2.662315000  |
| N | 4.662823000  | -0.858308000 | 3.429331000  |
| H | 5.358490000  | -1.573919000 | 3.595236000  |
| H | 4.545110000  | -0.136501000 | 4.131061000  |

### 85°

|   |              |              |              |
|---|--------------|--------------|--------------|
| Y | 1.516076000  | 0.067233000  | 0.338514000  |
| O | -0.760426000 | 0.347292000  | -0.175513000 |
| O | 0.781546000  | -1.988762000 | 1.235983000  |
| O | -7.303187000 | -0.337959000 | 1.030539000  |
| O | 1.415905000  | 2.374531000  | 0.753812000  |
| N | -6.221523000 | 0.057814000  | 0.459344000  |
| N | 1.075766000  | 1.212736000  | -2.043682000 |

|   |              |              |              |
|---|--------------|--------------|--------------|
| N | 3.674288000  | 1.370114000  | -0.486389000 |
| N | -2.513688000 | 1.227832000  | -1.314121000 |
| H | -2.801884000 | 1.827971000  | -2.080056000 |
| N | 0.962228000  | -1.775437000 | -1.520485000 |
| N | 3.572934000  | -1.625467000 | 0.021889000  |
| N | 2.316776000  | 4.430599000  | 0.997576000  |
| H | 1.430738000  | 4.813976000  | 1.306539000  |
| H | 3.110894000  | 5.054969000  | 0.941207000  |
| N | -0.217234000 | -4.011115000 | 1.135116000  |
| H | -0.138840000 | -4.131398000 | 2.138628000  |
| H | -0.656693000 | -4.749744000 | 0.601084000  |
| C | -0.245291000 | 1.877830000  | -1.955622000 |
| H | -0.666962000 | 2.085182000  | -2.947648000 |
| H | -0.120294000 | 2.837934000  | -1.445809000 |
| C | -3.569802000 | 0.612754000  | -0.494770000 |
| H | -3.049969000 | -0.071421000 | 0.176992000  |
| C | -1.212419000 | 1.080750000  | -1.094759000 |
| C | 0.222559000  | -2.896450000 | 0.568710000  |
| C | 3.780825000  | 2.581615000  | 0.359796000  |
| H | 4.422189000  | 3.345730000  | -0.097250000 |
| H | 4.234583000  | 2.303626000  | 1.316071000  |
| C | 2.410807000  | 3.140279000  | 0.706325000  |
| C | -5.423665000 | 1.085297000  | 1.212311000  |
| C | -4.552750000 | -0.149324000 | -1.386110000 |
| H | -5.016959000 | 0.560489000  | -2.083234000 |
| H | -4.023299000 | -0.895661000 | -1.987915000 |
| C | -4.328179000 | 1.679591000  | 0.301631000  |
| H | -3.635040000 | 2.254369000  | 0.925165000  |
| H | -4.788246000 | 2.381974000  | -0.405304000 |
| C | -5.658923000 | -0.866101000 | -0.584000000 |
| C | 2.139384000  | 2.222857000  | -2.321930000 |
| H | 1.887304000  | 3.140145000  | -1.788418000 |
| H | 2.156450000  | 2.482969000  | -3.389192000 |
| C | -0.018917000 | -2.706971000 | -0.919103000 |
| H | -0.045495000 | -3.670402000 | -1.444580000 |
| H | -1.017301000 | -2.265296000 | -0.996593000 |
| C | 0.369252000  | -1.124580000 | -2.727477000 |
| H | -0.686358000 | -0.935900000 | -2.529587000 |
| H | 0.405550000  | -1.805273000 | -3.588867000 |
| C | -4.821121000 | 0.437749000  | 2.478201000  |
| H | -5.611224000 | -0.064622000 | 3.043474000  |
| H | -4.375931000 | 1.211215000  | 3.113106000  |
| H | -4.044235000 | -0.296398000 | 2.246380000  |
| C | -6.391223000 | 2.206215000  | 1.628086000  |
| H | -6.887976000 | 2.635475000  | 0.751638000  |
| H | -5.831763000 | 3.000480000  | 2.133101000  |
| H | -7.154532000 | 1.825848000  | 2.309618000  |
| C | 4.023033000  | -2.015463000 | 1.375889000  |
| H | 5.047360000  | -2.409928000 | 1.370391000  |
| H | 3.369650000  | -2.808694000 | 1.751836000  |
| C | -6.806920000 | -1.237464000 | -1.537516000 |
| H | -6.418796000 | -1.864279000 | -2.346960000 |

|   |              |              |              |
|---|--------------|--------------|--------------|
| H | -7.251727000 | -0.338841000 | -1.977686000 |
| H | -7.586807000 | -1.788294000 | -1.008418000 |
| C | 4.891028000  | 0.519892000  | -0.310876000 |
| H | 5.200725000  | 0.577920000  | 0.732920000  |
| H | 5.725958000  | 0.918062000  | -0.903165000 |
| C | 4.667538000  | -0.933266000 | -0.722684000 |
| H | 4.432385000  | -0.982843000 | -1.786530000 |
| H | 5.613166000  | -1.478097000 | -0.591473000 |
| C | -5.128228000 | -2.145213000 | 0.098620000  |
| H | -4.870353000 | -2.890561000 | -0.661343000 |
| H | -5.904375000 | -2.562834000 | 0.746170000  |
| H | -4.236493000 | -1.961003000 | 0.705268000  |
| C | 3.131641000  | -2.832776000 | -0.738013000 |
| H | 2.632601000  | -3.510382000 | -0.043625000 |
| H | 3.998844000  | -3.380282000 | -1.131769000 |
| C | 3.532907000  | 1.740696000  | -1.927687000 |
| H | 3.805021000  | 0.868195000  | -2.523116000 |
| H | 4.257262000  | 2.526135000  | -2.185479000 |
| C | 3.878070000  | -0.863619000 | 2.355609000  |
| C | 2.210679000  | -2.496639000 | -1.907538000 |
| H | 2.741638000  | -1.878116000 | -2.631930000 |
| H | 1.957932000  | -3.430797000 | -2.428724000 |
| C | 1.075543000  | 0.171783000  | -3.114099000 |
| H | 2.112451000  | -0.034900000 | -3.383231000 |
| H | 0.597343000  | 0.567153000  | -4.021394000 |
| O | 3.020471000  | 0.029246000  | 2.149092000  |
| O | 0.245487000  | 0.428797000  | 2.423083000  |
| H | -0.535984000 | 0.984216000  | 2.256537000  |
| H | -0.107973000 | -0.435432000 | 2.701038000  |
| N | 4.646935000  | -0.862427000 | 3.436932000  |
| H | 5.348802000  | -1.572723000 | 3.599738000  |
| H | 4.520989000  | -0.146369000 | 4.143162000  |

### 95°

|   |              |              |              |
|---|--------------|--------------|--------------|
| Y | 1.516353000  | 0.066656000  | 0.337694000  |
| O | -0.761645000 | 0.353977000  | -0.167528000 |
| O | 0.800666000  | -2.005128000 | 1.226490000  |
| O | -7.304265000 | -0.345745000 | 1.027885000  |
| O | 1.409764000  | 2.374432000  | 0.754262000  |
| N | -6.222874000 | 0.052366000  | 0.457815000  |
| N | 1.074540000  | 1.220532000  | -2.040339000 |
| N | 3.671749000  | 1.378345000  | -0.477891000 |
| N | -2.514782000 | 1.229832000  | -1.309795000 |
| H | -2.803278000 | 1.828445000  | -2.076873000 |
| N | 0.967268000  | -1.768236000 | -1.525982000 |
| N | 3.578647000  | -1.617163000 | 0.017147000  |
| N | 2.303842000  | 4.432315000  | 1.008871000  |
| H | 1.415525000  | 4.812279000  | 1.315416000  |
| H | 3.096640000  | 5.058821000  | 0.958317000  |
| N | -0.190542000 | -4.031202000 | 1.113603000  |
| H | -0.104778000 | -4.161305000 | 2.115287000  |

|   |              |              |              |
|---|--------------|--------------|--------------|
| H | -0.630356000 | -4.766346000 | 0.575046000  |
| C | -0.247271000 | 1.883853000  | -1.949513000 |
| H | -0.670052000 | 2.092859000  | -2.940689000 |
| H | -0.122792000 | 2.842961000  | -1.437738000 |
| C | -3.570972000 | 0.613390000  | -0.491432000 |
| H | -3.050794000 | -0.067679000 | 0.183210000  |
| C | -1.213826000 | 1.085665000  | -1.089037000 |
| C | 0.240246000  | -2.908788000 | 0.555386000  |
| C | 3.774673000  | 2.588539000  | 0.370601000  |
| H | 4.415635000  | 3.354517000  | -0.083888000 |
| H | 4.227210000  | 2.309919000  | 1.327313000  |
| C | 2.402340000  | 3.142984000  | 0.713908000  |
| C | -5.430320000 | 1.084713000  | 1.209726000  |
| C | -4.549291000 | -0.153910000 | -1.383435000 |
| H | -5.013944000 | 0.552703000  | -2.083464000 |
| H | -4.016053000 | -0.900114000 | -1.982039000 |
| C | -4.334488000 | 1.680059000  | 0.300210000  |
| H | -3.644614000 | 2.258582000  | 0.923885000  |
| H | -4.794916000 | 2.379174000  | -0.409711000 |
| C | -5.655119000 | -0.872167000 | -0.582159000 |
| C | 2.137416000  | 2.232686000  | -2.314439000 |
| H | 1.883142000  | 3.148672000  | -1.779878000 |
| H | 2.156203000  | 2.494752000  | -3.381171000 |
| C | -0.011610000 | -2.704765000 | -0.928538000 |
| H | -0.043058000 | -3.662341000 | -1.464138000 |
| H | -1.009675000 | -2.260450000 | -0.995059000 |
| C | 0.371806000  | -1.115252000 | -2.730627000 |
| H | -0.683925000 | -0.928931000 | -2.530663000 |
| H | 0.407952000  | -1.793743000 | -3.593730000 |
| C | -4.828682000 | 0.442867000  | 2.478930000  |
| H | -5.618315000 | -0.061083000 | 3.043441000  |
| H | -4.388178000 | 1.219757000  | 3.112924000  |
| H | -4.048310000 | -0.288886000 | 2.251105000  |
| C | -6.402728000 | 2.203609000  | 1.619592000  |
| H | -6.898133000 | 2.628953000  | 0.740465000  |
| H | -5.847458000 | 3.001030000  | 2.124256000  |
| H | -7.166928000 | 1.822491000  | 2.299685000  |
| C | 4.027188000  | -2.010809000 | 1.370861000  |
| H | 5.054652000  | -2.396943000 | 1.366784000  |
| H | 3.378889000  | -2.811190000 | 1.740194000  |
| C | -6.799822000 | -1.249213000 | -1.537406000 |
| H | -6.408084000 | -1.876950000 | -2.344403000 |
| H | -7.246195000 | -0.352968000 | -1.980814000 |
| H | -7.579316000 | -1.800959000 | -1.008681000 |
| C | 4.890961000  | 0.531713000  | -0.302839000 |
| H | 5.196467000  | 0.585324000  | 0.742571000  |
| H | 5.726683000  | 0.935937000  | -0.889912000 |
| C | 4.673087000  | -0.919768000 | -0.722437000 |
| H | 4.440168000  | -0.965241000 | -1.786976000 |
| H | 5.619750000  | -1.462847000 | -0.591642000 |
| C | -5.122081000 | -2.148054000 | 0.104653000  |
| H | -4.860656000 | -2.894567000 | -0.652941000 |



|   |              |              |              |
|---|--------------|--------------|--------------|
| H | -5.898259000 | -2.566233000 | 0.751791000  |
| H | -4.232052000 | -1.959746000 | 0.712530000  |
| C | 3.141626000  | -2.822594000 | -0.748673000 |
| H | 2.646893000  | -3.506341000 | -0.057466000 |
| H | 4.010884000  | -3.363774000 | -1.146548000 |
| C | 3.531027000  | 1.751667000  | -1.918806000 |
| H | 3.805025000  | 0.880747000  | -2.515617000 |
| H | 4.254598000  | 2.538606000  | -2.174152000 |
| C | 3.869930000  | -0.866924000 | 2.358163000  |
| C | 2.217946000  | -2.484893000 | -1.915936000 |
| H | 2.746611000  | -1.862483000 | -2.638724000 |
| H | 1.967264000  | -3.418001000 | -2.439922000 |
| C | 1.075205000  | 0.183467000  | -3.114415000 |
| H | 2.112185000  | -0.020150000 | -3.385672000 |
| H | 0.594952000  | 0.580778000  | -4.019744000 |
| O | 3.003737000  | 0.019665000  | 2.157549000  |
| O | 0.226981000  | 0.403670000  | 2.417431000  |
| H | -0.632483000 | 0.802711000  | 2.193420000  |
| H | 0.012179000  | -0.481950000 | 2.762395000  |
| N | 4.636693000  | -0.866278000 | 3.440630000  |
| H | 5.345406000  | -1.570763000 | 3.599166000  |
| H | 4.502797000  | -0.156598000 | 4.151867000  |

### 105°

|   |              |              |              |
|---|--------------|--------------|--------------|
| Y | 1.516187000  | 0.065722000  | 0.338313000  |
| O | -0.762647000 | 0.361513000  | -0.158751000 |
| O | 0.817631000  | -2.017634000 | 1.219435000  |
| O | -7.307301000 | -0.349073000 | 1.025406000  |
| O | 1.407682000  | 2.376235000  | 0.751700000  |
| N | -6.225046000 | 0.049945000  | 0.457644000  |
| N | 1.072165000  | 1.226448000  | -2.037218000 |
| N | 3.670627000  | 1.382985000  | -0.473374000 |
| N | -2.516160000 | 1.231313000  | -1.305188000 |
| H | -2.804986000 | 1.828441000  | -2.073327000 |
| N | 0.968921000  | -1.762240000 | -1.529526000 |
| N | 3.582314000  | -1.612066000 | 0.011960000  |
| N | 2.299230000  | 4.434395000  | 1.014321000  |
| H | 1.409632000  | 4.813097000  | 1.318614000  |
| H | 3.091751000  | 5.061521000  | 0.967729000  |
| N | -0.163746000 | -4.048601000 | 1.097542000  |
| H | -0.069659000 | -4.187354000 | 2.097291000  |
| H | -0.603397000 | -4.781251000 | 0.555471000  |
| C | -0.249356000 | 1.889895000  | -1.942710000 |
| H | -0.673492000 | 2.101626000  | -2.932705000 |
| H | -0.123760000 | 2.847455000  | -1.428362000 |
| C | -3.572555000 | 0.612232000  | -0.488911000 |
| H | -3.052948000 | -0.072654000 | 0.182224000  |
| C | -1.215477000 | 1.090845000  | -1.082530000 |
| C | 0.256330000  | -2.918377000 | 0.546151000  |
| C | 3.772669000  | 2.592507000  | 0.376078000  |
| H | 4.414200000  | 3.358786000  | -0.077137000 |

|   |              |              |              |
|---|--------------|--------------|--------------|
| H | 4.224192000  | 2.313414000  | 1.333175000  |
| C | 2.399355000  | 3.145579000  | 0.716717000  |
| C | -5.431438000 | 1.077960000  | 1.214405000  |
| C | -4.551616000 | -0.150162000 | -1.384178000 |
| H | -5.016072000 | 0.559984000  | -2.080777000 |
| H | -4.019178000 | -0.894105000 | -1.986288000 |
| C | -4.334715000 | 1.676135000  | 0.307712000  |
| H | -3.644060000 | 2.250817000  | 0.934051000  |
| H | -4.794132000 | 2.379022000  | -0.399088000 |
| C | -5.657678000 | -0.871080000 | -0.585656000 |
| C | 2.135311000  | 2.238964000  | -2.309440000 |
| H | 1.880798000  | 3.154471000  | -1.774337000 |
| H | 2.154728000  | 2.502040000  | -3.375893000 |
| C | -0.007511000 | -2.702405000 | -0.933839000 |
| H | -0.044403000 | -3.654972000 | -1.477763000 |
| H | -1.005171000 | -2.255586000 | -0.989567000 |
| C | 0.370065000  | -1.107661000 | -2.731494000 |
| H | -0.685394000 | -0.922827000 | -2.528343000 |
| H | 0.404561000  | -1.784560000 | -3.595906000 |
| C | -4.830777000 | 0.430003000  | 2.480949000  |
| H | -5.621147000 | -0.075024000 | 3.043480000  |
| H | -4.389101000 | 1.203671000  | 3.118057000  |
| H | -4.051516000 | -0.302049000 | 2.250272000  |
| C | -6.402565000 | 2.196240000  | 1.628983000  |
| H | -6.897950000 | 2.625413000  | 0.751718000  |
| H | -5.846244000 | 2.991159000  | 2.136413000  |
| H | -7.166834000 | 1.813375000  | 2.308033000  |
| C | 4.029821000  | -2.008980000 | 1.365172000  |
| H | 5.059585000  | -2.388924000 | 1.361988000  |
| H | 3.385381000  | -2.814809000 | 1.729235000  |
| C | -6.802443000 | -1.244011000 | -1.542435000 |
| H | -6.410890000 | -1.868954000 | -2.351675000 |
| H | -7.248380000 | -0.345947000 | -1.982590000 |
| H | -7.582265000 | -1.797336000 | -1.015849000 |
| C | 4.891283000  | 0.538546000  | -0.299243000 |
| H | 5.194052000  | 0.588726000  | 0.747258000  |
| H | 5.727531000  | 0.946815000  | -0.882797000 |
| C | 4.676713000  | -0.911520000 | -0.724302000 |
| H | 4.445158000  | -0.954083000 | -1.789280000 |
| H | 5.623940000  | -1.453727000 | -0.594023000 |
| C | -5.125404000 | -2.149852000 | 0.096383000  |
| H | -4.863913000 | -2.893488000 | -0.664005000 |
| H | -5.902123000 | -2.570223000 | 0.741465000  |
| H | -4.235624000 | -1.964451000 | 0.705525000  |
| C | 3.147454000  | -2.815435000 | -0.758647000 |
| H | 2.656540000  | -3.504283000 | -0.069999000 |
| H | 4.017740000  | -3.351683000 | -1.160895000 |
| C | 3.528920000  | 1.757612000  | -1.913988000 |
| H | 3.802686000  | 0.887187000  | -2.511584000 |
| H | 4.252424000  | 2.544770000  | -2.168889000 |
| C | 3.863723000  | -0.872000000 | 2.359244000  |
| C | 2.220708000  | -2.475560000 | -1.923156000 |

|   |              |              |              |
|---|--------------|--------------|--------------|
| H | 2.747158000  | -1.849865000 | -2.644789000 |
| H | 1.970861000  | -3.407464000 | -2.449656000 |
| C | 1.071081000  | 0.192577000  | -3.114234000 |
| H | 2.107520000  | -0.009042000 | -3.389047000 |
| H | 0.587820000  | 0.591694000  | -4.017133000 |
| O | 2.991411000  | 0.010484000  | 2.164401000  |
| O | 0.214328000  | 0.400604000  | 2.408621000  |
| H | -0.689500000 | 0.652172000  | 2.146666000  |
| H | 0.119495000  | -0.460210000 | 2.854194000  |
| N | 4.628980000  | -0.873522000 | 3.442490000  |
| H | 5.342502000  | -1.574104000 | 3.596843000  |
| H | 4.489383000  | -0.169793000 | 4.158562000  |

- XYZ coordinates for  $[Y(L_2)]^{3+}$  as a function of the dihedral angle O(amide)-Y-O(water)-H(water):

-65°

|   |              |              |              |
|---|--------------|--------------|--------------|
| Y | -1.531873000 | 0.209481000  | -0.479159000 |
| O | 0.720138000  | 0.379132000  | 0.023893000  |
| O | -0.903268000 | -1.893333000 | -1.311480000 |
| O | 7.327202000  | -0.703992000 | -0.807612000 |
| O | -1.262662000 | 2.468281000  | -1.050110000 |
| N | 6.232347000  | -0.235499000 | -0.323729000 |
| N | -1.095923000 | 1.443581000  | 1.804221000  |
| N | -3.620418000 | 1.708032000  | 0.157868000  |
| N | 2.500383000  | 1.199819000  | 1.173313000  |
| H | 2.799409000  | 1.816886000  | 1.921994000  |
| N | -1.133066000 | -1.556409000 | 1.409263000  |
| N | -3.710710000 | -1.304480000 | -0.208834000 |
| N | -1.996998000 | 4.558675000  | -1.481390000 |
| H | -1.074325000 | 4.848820000  | -1.785493000 |
| H | -2.741937000 | 5.243389000  | -1.506064000 |
| N | -0.021961000 | -3.963685000 | -1.111294000 |
| H | -0.095998000 | -4.124033000 | -2.109666000 |
| H | 0.363796000  | -4.703473000 | -0.538454000 |
| C | 0.270304000  | 2.012916000  | 1.731278000  |
| H | 0.677854000  | 2.220975000  | 2.728328000  |
| H | 0.226380000  | 2.963246000  | 1.190790000  |
| C | 3.552745000  | 0.489635000  | 0.429955000  |
| H | 3.029246000  | -0.179120000 | -0.254420000 |
| C | 1.201070000  | 1.122940000  | 0.923732000  |
| C | -0.403520000 | -2.803286000 | -0.600051000 |
| C | -3.615107000 | 2.878688000  | -0.750951000 |
| H | -4.199976000 | 3.714169000  | -0.345831000 |
| H | -4.078505000 | 2.590882000  | -1.700702000 |
| C | -2.198837000 | 3.308046000  | -1.095526000 |
| C | 5.543166000  | 0.807486000  | -1.157413000 |
| C | 4.430094000  | -0.301774000 | 1.403710000  |
| H | 4.880047000  | 0.401848000  | 2.116162000  |
| H | 3.820746000  | -1.003120000 | 1.983752000  |

|   |              |              |              |
|---|--------------|--------------|--------------|
| C | 4.424024000  | 1.486648000  | -0.340745000 |
| H | 3.809121000  | 2.081881000  | -1.024372000 |
| H | 4.874491000  | 2.181926000  | 0.379221000  |
| C | 5.551523000  | -1.096005000 | 0.702585000  |
| C | -2.092694000 | 2.542126000  | 2.000428000  |
| H | -1.757984000 | 3.409603000  | 1.430491000  |
| H | -2.117398000 | 2.854418000  | 3.052813000  |
| C | -0.174523000 | -2.555041000 | 0.879666000  |
| H | -0.196316000 | -3.488260000 | 1.455542000  |
| H | 0.837623000  | -2.146067000 | 0.954045000  |
| C | -0.557976000 | -0.894631000 | 2.621593000  |
| H | 0.516058000  | -0.778637000 | 2.471045000  |
| H | -0.677935000 | -1.538124000 | 3.502964000  |
| C | 4.991043000  | 0.151880000  | -2.441665000 |
| H | 5.785402000  | -0.418088000 | -2.931751000 |
| H | 4.640894000  | 0.926868000  | -3.131795000 |
| H | 4.154271000  | -0.524348000 | -2.242745000 |
| C | 6.595563000  | 1.863391000  | -1.535021000 |
| H | 7.053003000  | 2.293036000  | -0.637547000 |
| H | 6.116538000  | 2.669930000  | -2.099711000 |
| H | 7.382936000  | 1.423125000  | -2.149796000 |
| C | -4.185140000 | -1.731815000 | -1.566846000 |
| C | 6.609637000  | -1.491122000 | 1.746327000  |
| H | 6.136357000  | -2.074829000 | 2.542679000  |
| H | 7.064864000  | -0.600873000 | 2.192967000  |
| H | 7.397910000  | -2.092948000 | 1.290084000  |
| C | -4.878981000 | 0.919398000  | -0.027528000 |
| H | -5.113751000 | 0.910919000  | -1.094070000 |
| H | -5.719887000 | 1.412293000  | 0.478112000  |
| C | -4.763535000 | -0.509787000 | 0.491277000  |
| H | -4.540179000 | -0.512425000 | 1.559084000  |
| H | -5.739225000 | -1.001104000 | 0.380349000  |
| C | 5.004311000  | -2.368510000 | 0.020570000  |
| H | 4.662634000  | -3.078365000 | 0.781324000  |
| H | 5.798897000  | -2.840388000 | -0.564209000 |
| H | 4.162962000  | -2.159507000 | -0.646809000 |
| C | -3.347098000 | -2.514198000 | 0.587566000  |
| H | -2.878336000 | -3.229420000 | -0.090829000 |
| H | -4.249736000 | -3.004446000 | 0.974556000  |
| C | -3.505143000 | 2.144369000  | 1.583491000  |
| H | -3.863092000 | 1.328357000  | 2.212243000  |
| H | -4.176005000 | 2.994158000  | 1.770285000  |
| C | -2.431525000 | -2.212880000 | 1.770994000  |
| H | -2.945995000 | -1.559644000 | 2.477159000  |
| H | -2.234335000 | -3.151195000 | 2.306269000  |
| C | -1.204180000 | 0.455433000  | 2.920679000  |
| H | -2.262874000 | 0.321343000  | 3.145936000  |
| H | -0.744576000 | 0.866593000  | 3.830068000  |
| O | -0.689871000 | 0.391034000  | -2.719801000 |
| H | -0.253069000 | 1.219284000  | -2.982828000 |
| H | -0.152620000 | -0.346285000 | -3.057705000 |
| C | -5.364572000 | -2.605076000 | -1.554963000 |

|   |              |              |              |
|---|--------------|--------------|--------------|
| C | -6.335140000 | -3.324537000 | -1.544061000 |
| H | -3.347794000 | -2.236622000 | -2.058707000 |
| H | -4.395832000 | -0.834563000 | -2.157306000 |
| H | -7.191686000 | -3.962793000 | -1.539757000 |

**-75°**

|   |              |              |              |
|---|--------------|--------------|--------------|
| Y | -1.530036000 | 0.209371000  | -0.480460000 |
| O | 0.721299000  | 0.368041000  | 0.031646000  |
| O | -0.899926000 | -1.893370000 | -1.310137000 |
| O | 7.328656000  | -0.699707000 | -0.810088000 |
| O | -1.268378000 | 2.468859000  | -1.056468000 |
| N | 6.233672000  | -0.232729000 | -0.325022000 |
| N | -1.096407000 | 1.442062000  | 1.803737000  |
| N | -3.622208000 | 1.707421000  | 0.158847000  |
| N | 2.501069000  | 1.198119000  | 1.174879000  |
| H | 2.799886000  | 1.819150000  | 1.920363000  |
| N | -1.133830000 | -1.558040000 | 1.410366000  |
| N | -3.709972000 | -1.304552000 | -0.209524000 |
| N | -2.001887000 | 4.562980000  | -1.471196000 |
| H | -1.079658000 | 4.854556000  | -1.775348000 |
| H | -2.746380000 | 5.248406000  | -1.489525000 |
| N | -0.019596000 | -3.963996000 | -1.109725000 |
| H | -0.092291000 | -4.123689000 | -2.108279000 |
| H | 0.364751000  | -4.704361000 | -0.536728000 |
| C | 0.270216000  | 2.010231000  | 1.731017000  |
| H | 0.676866000  | 2.220440000  | 2.728037000  |
| H | 0.227514000  | 2.959374000  | 1.188273000  |
| C | 3.553894000  | 0.489161000  | 0.431010000  |
| H | 3.030677000  | -0.179236000 | -0.253903000 |
| C | 1.201585000  | 1.117473000  | 0.927043000  |
| C | -0.401600000 | -2.803559000 | -0.598392000 |
| C | -3.619308000 | 2.878685000  | -0.748943000 |
| H | -4.205573000 | 3.712812000  | -0.343125000 |
| H | -4.082322000 | 2.590823000  | -1.698870000 |
| C | -2.203923000 | 3.309913000  | -1.093586000 |
| C | 5.543422000  | 0.810999000  | -1.156863000 |
| C | 4.432299000  | -0.302809000 | 1.403312000  |
| H | 4.882074000  | 0.400113000  | 2.116552000  |
| H | 3.823781000  | -1.005453000 | 1.982659000  |
| C | 4.423939000  | 1.487921000  | -0.338851000 |
| H | 3.808131000  | 2.083407000  | -1.021444000 |
| H | 4.874034000  | 2.182768000  | 0.381779000  |
| C | 5.553940000  | -1.095220000 | 0.700387000  |
| C | -2.092619000 | 2.541051000  | 1.999900000  |
| H | -1.758096000 | 3.408113000  | 1.429189000  |
| H | -2.116435000 | 2.854015000  | 3.052114000  |
| C | -0.174626000 | -2.556457000 | 0.881787000  |
| H | -0.197465000 | -3.490032000 | 1.457075000  |
| H | 0.837404000  | -2.147590000 | 0.957766000  |
| C | -0.560267000 | -0.896276000 | 2.623238000  |
| H | 0.514120000  | -0.781389000 | 2.474685000  |
| H | -0.682452000 | -1.539077000 | 3.504826000  |

|   |              |              |              |
|---|--------------|--------------|--------------|
| C | 4.991442000  | 0.157096000  | -2.442048000 |
| H | 5.786079000  | -0.411445000 | -2.933337000 |
| H | 4.640505000  | 0.932990000  | -3.130769000 |
| H | 4.155205000  | -0.520048000 | -2.244010000 |
| C | 6.594832000  | 1.868413000  | -1.533053000 |
| H | 7.052205000  | 2.296941000  | -0.635007000 |
| H | 6.114932000  | 2.675503000  | -2.096215000 |
| H | 7.382367000  | 1.429859000  | -2.148838000 |
| C | -4.183809000 | -1.730388000 | -1.568250000 |
| C | 6.612922000  | -1.491195000 | 1.742911000  |
| H | 6.140502000  | -2.076432000 | 2.538649000  |
| H | 7.067798000  | -0.601310000 | 2.190630000  |
| H | 7.401341000  | -2.091781000 | 1.285286000  |
| C | -4.880141000 | 0.917999000  | -0.026091000 |
| H | -5.115616000 | 0.910076000  | -1.092488000 |
| H | -5.721149000 | 1.409838000  | 0.480458000  |
| C | -4.763304000 | -0.511422000 | 0.491386000  |
| H | -4.539781000 | -0.514740000 | 1.559160000  |
| H | -5.738600000 | -1.003502000 | 0.380217000  |
| C | 5.007331000  | -2.367076000 | 0.016666000  |
| H | 4.666520000  | -3.078376000 | 0.776453000  |
| H | 5.802008000  | -2.837455000 | -0.569201000 |
| H | 4.165545000  | -2.157686000 | -0.650038000 |
| C | -3.346584000 | -2.515147000 | 0.585618000  |
| H | -2.876683000 | -3.229239000 | -0.093168000 |
| H | -4.249445000 | -3.006288000 | 0.970966000  |
| C | -3.505564000 | 2.143171000  | 1.584403000  |
| H | -3.862617000 | 1.326866000  | 2.213286000  |
| H | -4.176361000 | 2.992738000  | 1.772479000  |
| C | -2.432526000 | -2.214571000 | 1.770318000  |
| H | -2.947810000 | -1.561682000 | 2.476220000  |
| H | -2.236120000 | -3.153231000 | 2.305323000  |
| C | -1.205890000 | 0.454396000  | 2.920569000  |
| H | -2.264825000 | 0.320835000  | 3.144926000  |
| H | -0.746979000 | 0.866128000  | 3.830068000  |
| O | -0.688685000 | 0.386475000  | -2.714146000 |
| H | -0.376207000 | 1.243484000  | -3.050106000 |
| H | -0.116497000 | -0.309099000 | -3.080131000 |
| C | -5.362919000 | -2.604078000 | -1.558012000 |
| C | -6.333230000 | -3.323910000 | -1.548537000 |
| H | -3.346017000 | -2.234228000 | -2.060380000 |
| H | -4.394586000 | -0.832480000 | -2.157674000 |
| H | -7.189554000 | -3.962470000 | -1.545518000 |

**-85°**

|   |              |              |              |
|---|--------------|--------------|--------------|
| Y | -1.526755000 | 0.210365000  | -0.480877000 |
| O | 0.722838000  | 0.363198000  | 0.039863000  |
| O | -0.899966000 | -1.896862000 | -1.305363000 |
| O | 7.327112000  | -0.698765000 | -0.815112000 |
| O | -1.267131000 | 2.467107000  | -1.059142000 |
| N | 6.232984000  | -0.231789000 | -0.328089000 |
| N | -1.095921000 | 1.444142000  | 1.804393000  |

|   |              |              |              |
|---|--------------|--------------|--------------|
| N | -3.620959000 | 1.708895000  | 0.157232000  |
| N | 2.502764000  | 1.199344000  | 1.177944000  |
| H | 2.802104000  | 1.823292000  | 1.920755000  |
| N | -1.135095000 | -1.556782000 | 1.414141000  |
| N | -3.708717000 | -1.302814000 | -0.208716000 |
| N | -1.998429000 | 4.561909000  | -1.474229000 |
| H | -1.075870000 | 4.852523000  | -1.778261000 |
| H | -2.742205000 | 5.248094000  | -1.492474000 |
| N | -0.019619000 | -3.967080000 | -1.101185000 |
| H | -0.091686000 | -4.128380000 | -2.099511000 |
| H | 0.364426000  | -4.706480000 | -0.526773000 |
| C | 0.271156000  | 2.011395000  | 1.733052000  |
| H | 0.676418000  | 2.222993000  | 2.730372000  |
| H | 0.229890000  | 2.959708000  | 1.188698000  |
| C | 3.554720000  | 0.490291000  | 0.433002000  |
| H | 3.030495000  | -0.178157000 | -0.251073000 |
| C | 1.202927000  | 1.116429000  | 0.931888000  |
| C | -0.401919000 | -2.805714000 | -0.591946000 |
| C | -3.617469000 | 2.879348000  | -0.751464000 |
| H | -4.202971000 | 3.714284000  | -0.346163000 |
| H | -4.080923000 | 2.591120000  | -1.701052000 |
| C | -2.201689000 | 3.308997000  | -1.096345000 |
| C | 5.541457000  | 0.812213000  | -1.158501000 |
| C | 4.434777000  | -0.301875000 | 1.403616000  |
| H | 4.886073000  | 0.400762000  | 2.116170000  |
| H | 3.827217000  | -1.004543000 | 1.983955000  |
| C | 4.423414000  | 1.489039000  | -0.338423000 |
| H | 3.806331000  | 2.084456000  | -1.019924000 |
| H | 4.874781000  | 2.183927000  | 0.381383000  |
| C | 5.554880000  | -1.094419000 | 0.698316000  |
| C | -2.091783000 | 2.543716000  | 1.998319000  |
| H | -1.756584000 | 3.409854000  | 1.426560000  |
| H | -2.116248000 | 2.858235000  | 3.050075000  |
| C | -0.175859000 | -2.556286000 | 0.887959000  |
| H | -0.199431000 | -3.488962000 | 1.464735000  |
| H | 0.836224000  | -2.147578000 | 0.963968000  |
| C | -0.562665000 | -0.894030000 | 2.626927000  |
| H | 0.512012000  | -0.780337000 | 2.479818000  |
| H | -0.686778000 | -1.535612000 | 3.509156000  |
| C | 4.987230000  | 0.158787000  | -2.442981000 |
| H | 5.781040000  | -0.409420000 | -2.935995000 |
| H | 4.634929000  | 0.934974000  | -3.130680000 |
| H | 4.151454000  | -0.518556000 | -2.243754000 |
| C | 6.592321000  | 1.869607000  | -1.536264000 |
| H | 7.051297000  | 2.297914000  | -0.638932000 |
| H | 6.111508000  | 2.676853000  | -2.098429000 |
| H | 7.378742000  | 1.431126000  | -2.153530000 |
| C | -4.180948000 | -1.728954000 | -1.567855000 |
| C | 6.615730000  | -1.491116000 | 1.738648000  |
| H | 6.144653000  | -2.076522000 | 2.535058000  |
| H | 7.071743000  | -0.601549000 | 2.185836000  |
| H | 7.403093000  | -2.091758000 | 1.279274000  |

|   |              |              |              |
|---|--------------|--------------|--------------|
| C | -4.879037000 | 0.919775000  | -0.027501000 |
| H | -5.114298000 | 0.911293000  | -1.093945000 |
| H | -5.720059000 | 1.412088000  | 0.478593000  |
| C | -4.762580000 | -0.509291000 | 0.490769000  |
| H | -4.539869000 | -0.511937000 | 1.558712000  |
| H | -5.737805000 | -1.001454000 | 0.379192000  |
| C | 5.006717000  | -2.365899000 | 0.015128000  |
| H | 4.667035000  | -3.077351000 | 0.775280000  |
| H | 5.800264000  | -2.836292000 | -0.572266000 |
| H | 4.163859000  | -2.156124000 | -0.650092000 |
| C | -3.347139000 | -2.513097000 | 0.587529000  |
| H | -2.876747000 | -3.227946000 | -0.090082000 |
| H | -4.250825000 | -3.003422000 | 0.972009000  |
| C | -3.504619000 | 2.145661000  | 1.582481000  |
| H | -3.861957000 | 1.329820000  | 2.211785000  |
| H | -4.175419000 | 2.995425000  | 1.769707000  |
| C | -2.434490000 | -2.211956000 | 1.773137000  |
| H | -2.950270000 | -1.557946000 | 2.477633000  |
| H | -2.239534000 | -3.150199000 | 2.309452000  |
| C | -1.207477000 | 0.457564000  | 2.921908000  |
| H | -2.266773000 | 0.325016000  | 3.145133000  |
| H | -0.749369000 | 0.869775000  | 3.831614000  |
| O | -0.691035000 | 0.365090000  | -2.708026000 |
| H | -0.489766000 | 1.198085000  | -3.165395000 |
| H | -0.201924000 | -0.353778000 | -3.141722000 |
| C | -5.360660000 | -2.601914000 | -1.558798000 |
| C | -6.331492000 | -3.321057000 | -1.550050000 |
| H | -3.342781000 | -2.233546000 | -2.058533000 |
| H | -4.390426000 | -0.831196000 | -2.157984000 |
| H | -7.188261000 | -3.959022000 | -1.547657000 |

**-95°**

|   |              |              |              |
|---|--------------|--------------|--------------|
| Y | -1.523628000 | 0.210522000  | -0.479707000 |
| O | 0.723679000  | 0.369953000  | 0.041349000  |
| O | -0.904571000 | -1.902807000 | -1.298920000 |
| O | 7.323661000  | -0.703655000 | -0.818397000 |
| O | -1.259152000 | 2.463547000  | -1.060240000 |
| N | 6.230803000  | -0.234392000 | -0.330702000 |
| N | -1.094074000 | 1.449751000  | 1.805124000  |
| N | -3.616828000 | 1.711577000  | 0.153610000  |
| N | 2.504642000  | 1.204454000  | 1.178349000  |
| H | 2.805268000  | 1.828154000  | 1.920831000  |
| N | -1.135220000 | -1.552812000 | 1.418988000  |
| N | -3.707254000 | -1.300235000 | -0.205983000 |
| N | -1.987143000 | 4.557794000  | -1.483563000 |
| H | -1.063770000 | 4.846120000  | -1.787254000 |
| H | -2.729986000 | 5.244865000  | -1.505151000 |
| N | -0.022662000 | -3.971913000 | -1.089384000 |
| H | -0.095867000 | -4.136598000 | -2.087070000 |
| H | 0.362959000  | -4.709011000 | -0.513082000 |
| C | 0.273036000  | 2.016990000  | 1.735045000  |
| H | 0.677922000  | 2.227743000  | 2.732700000  |



|   |              |              |              |
|---|--------------|--------------|--------------|
| H | 0.232274000  | 2.965708000  | 1.191378000  |
| C | 3.554768000  | 0.493148000  | 0.432904000  |
| H | 3.028625000  | -0.175125000 | -0.249875000 |
| C | 1.204534000  | 1.122371000  | 0.933430000  |
| C | -0.404792000 | -2.809086000 | -0.583476000 |
| C | -3.609703000 | 2.880020000  | -0.757629000 |
| H | -4.193941000 | 3.717065000  | -0.354799000 |
| H | -4.072722000 | 2.590649000  | -1.707080000 |
| C | -2.192520000 | 3.306290000  | -1.101728000 |
| C | 5.539905000  | 0.809691000  | -1.161573000 |
| C | 4.434624000  | -0.299481000 | 1.403322000  |
| H | 4.887963000  | 0.403080000  | 2.114662000  |
| H | 3.826491000  | -1.000518000 | 1.985042000  |
| C | 4.424080000  | 1.489485000  | -0.340846000 |
| H | 3.807064000  | 2.084968000  | -1.022353000 |
| H | 4.877569000  | 2.184551000  | 0.377448000  |
| C | 5.552569000  | -1.094697000 | 0.697567000  |
| C | -2.090208000 | 2.549422000  | 1.995791000  |
| H | -1.754140000 | 3.414702000  | 1.423230000  |
| H | -2.116546000 | 2.865691000  | 3.047002000  |
| C | -0.176882000 | -2.554468000 | 0.895329000  |
| H | -0.200317000 | -3.485194000 | 1.475288000  |
| H | 0.835492000  | -2.145996000 | 0.969074000  |
| C | -0.562456000 | -0.887734000 | 2.630398000  |
| H | 0.512166000  | -0.774193000 | 2.482598000  |
| H | -0.686205000 | -1.527837000 | 3.513762000  |
| C | 4.983000000  | 0.155477000  | -2.444503000 |
| H | 5.775398000  | -0.414361000 | -2.937917000 |
| H | 4.630762000  | 0.931303000  | -3.132632000 |
| H | 4.146642000  | -0.520566000 | -2.243396000 |
| C | 6.592040000  | 1.864786000  | -1.542169000 |
| H | 7.052942000  | 2.293562000  | -0.646055000 |
| H | 6.111832000  | 2.672045000  | -2.104834000 |
| H | 7.376902000  | 1.424123000  | -2.159878000 |
| C | -4.177623000 | -1.729373000 | -1.564875000 |
| C | 6.614053000  | -1.491866000 | 1.737069000  |
| H | 6.142988000  | -2.075540000 | 2.534758000  |
| H | 7.072071000  | -0.602510000 | 2.182621000  |
| H | 7.399873000  | -2.094360000 | 1.277474000  |
| C | -4.875779000 | 0.923867000  | -0.031369000 |
| H | -5.109638000 | 0.913623000  | -1.098111000 |
| H | -5.716803000 | 1.418285000  | 0.472658000  |
| C | -4.761666000 | -0.504318000 | 0.489956000  |
| H | -4.540642000 | -0.504932000 | 1.558254000  |
| H | -5.737134000 | -0.995834000 | 0.377804000  |
| C | 5.001510000  | -2.366168000 | 0.016672000  |
| H | 4.661566000  | -3.076038000 | 0.778195000  |
| H | 5.793586000  | -2.838650000 | -0.571034000 |
| H | 4.158208000  | -2.155923000 | -0.647825000 |
| C | -3.348063000 | -2.508822000 | 0.593960000  |
| H | -2.878530000 | -3.226461000 | -0.081227000 |
| H | -4.252727000 | -2.996530000 | 0.979454000  |

|   |              |              |              |
|---|--------------|--------------|--------------|
| C | -3.502254000 | 2.150654000  | 1.578295000  |
| H | -3.860530000 | 1.335807000  | 2.208316000  |
| H | -4.173361000 | 3.000746000  | 1.763032000  |
| C | -2.435470000 | -2.205567000 | 1.779100000  |
| H | -2.950840000 | -1.549159000 | 2.481642000  |
| H | -2.241786000 | -3.142587000 | 2.318031000  |
| C | -1.207123000 | 0.464492000  | 2.923395000  |
| H | -2.266663000 | 0.332617000  | 3.145854000  |
| H | -0.749669000 | 0.877210000  | 3.833214000  |
| O | -0.693306000 | 0.338139000  | -2.707342000 |
| H | -0.600854000 | 1.124356000  | -3.269744000 |
| H | -0.420903000 | -0.443842000 | -3.215570000 |
| C | -5.358601000 | -2.600608000 | -1.555452000 |
| C | -6.330557000 | -3.318224000 | -1.545992000 |
| H | -3.339254000 | -2.236475000 | -2.052502000 |
| H | -4.384803000 | -0.832853000 | -2.157737000 |
| H | -7.188280000 | -3.954902000 | -1.542988000 |

**-105°**

|   |              |              |              |
|---|--------------|--------------|--------------|
| Y | -1.523158000 | 0.209715000  | -0.479016000 |
| O | 0.723591000  | 0.374319000  | 0.037881000  |
| O | -0.908217000 | -1.905706000 | -1.296594000 |
| O | 7.324130000  | -0.705847000 | -0.817199000 |
| O | -1.257050000 | 2.462456000  | -1.060203000 |
| N | 6.231157000  | -0.235527000 | -0.330780000 |
| N | -1.092541000 | 1.452016000  | 1.804454000  |
| N | -3.615436000 | 1.712010000  | 0.153592000  |
| N | 2.505268000  | 1.206923000  | 1.175160000  |
| H | 2.806312000  | 1.830019000  | 1.917983000  |
| N | -1.133327000 | -1.551279000 | 1.420268000  |
| N | -3.706676000 | -1.299754000 | -0.203474000 |
| N | -1.983820000 | 4.557296000  | -1.482890000 |
| H | -1.060216000 | 4.845251000  | -1.786249000 |
| H | -2.726324000 | 5.244735000  | -1.504423000 |
| N | -0.023878000 | -3.973750000 | -1.086251000 |
| H | -0.098555000 | -4.139727000 | -2.083611000 |
| H | 0.363736000  | -4.709631000 | -0.509728000 |
| C | 0.274217000  | 2.019829000  | 1.733262000  |
| H | 0.680010000  | 2.230442000  | 2.730575000  |
| H | 0.232701000  | 2.968661000  | 1.189879000  |
| C | 3.555016000  | 0.494234000  | 0.430464000  |
| H | 3.028599000  | -0.174524000 | -0.251645000 |
| C | 1.205118000  | 1.125702000  | 0.930528000  |
| C | -0.405995000 | -2.810596000 | -0.581160000 |
| C | -3.607476000 | 2.879873000  | -0.758424000 |
| H | -4.192085000 | 3.717172000  | -0.356686000 |
| H | -4.069685000 | 2.589797000  | -1.708063000 |
| C | -2.189938000 | 3.305716000  | -1.101663000 |
| C | 5.541050000  | 0.807653000  | -1.163478000 |
| C | 4.434072000  | -0.297557000 | 1.402301000  |
| H | 4.887340000  | 0.405766000  | 2.112945000  |
| H | 3.825313000  | -0.997539000 | 1.984640000  |

|   |              |              |              |
|---|--------------|--------------|--------------|
| C | 4.425096000  | 1.489102000  | -0.344275000 |
| H | 3.808643000  | 2.083841000  | -1.026934000 |
| H | 4.878526000  | 2.184976000  | 0.373271000  |
| C | 5.552069000  | -1.094172000 | 0.698280000  |
| C | -2.089030000 | 2.551263000  | 1.995214000  |
| H | -1.753461000 | 3.416663000  | 1.422545000  |
| H | -2.115327000 | 2.867661000  | 3.046388000  |
| C | -0.175723000 | -2.553789000 | 0.896940000  |
| H | -0.198532000 | -3.483652000 | 1.478302000  |
| H | 0.836811000  | -2.145349000 | 0.968787000  |
| C | -0.559530000 | -0.884936000 | 2.630519000  |
| H | 0.514892000  | -0.771056000 | 2.481348000  |
| H | -0.681970000 | -1.524402000 | 3.514526000  |
| C | 4.984564000  | 0.151772000  | -2.445737000 |
| H | 5.777027000  | -0.419087000 | -2.937867000 |
| H | 4.632977000  | 0.926695000  | -3.135206000 |
| H | 4.147841000  | -0.523655000 | -2.244109000 |
| C | 6.593805000  | 1.861779000  | -1.545034000 |
| H | 7.054423000  | 2.291633000  | -0.649289000 |
| H | 6.114221000  | 2.668434000  | -2.109093000 |
| H | 7.378806000  | 1.419908000  | -2.161703000 |
| C | -4.176571000 | -1.730396000 | -1.562129000 |
| C | 6.612798000  | -1.490276000 | 1.738979000  |
| H | 6.141038000  | -2.072667000 | 2.537198000  |
| H | 7.070855000  | -0.600461000 | 2.183580000  |
| H | 7.398691000  | -2.093691000 | 1.280721000  |
| C | -4.874754000 | 0.924762000  | -0.031004000 |
| H | -5.108553000 | 0.913817000  | -1.097764000 |
| H | -5.715613000 | 1.419899000  | 0.472571000  |
| C | -4.761165000 | -0.503084000 | 0.491452000  |
| H | -4.540369000 | -0.502862000 | 1.559807000  |
| H | -5.736710000 | -0.994461000 | 0.379435000  |
| C | 5.000841000  | -2.366370000 | 0.018893000  |
| H | 4.660366000  | -3.075081000 | 0.781263000  |
| H | 5.792981000  | -2.839923000 | -0.567861000 |
| H | 4.157840000  | -2.156732000 | -0.646185000 |
| C | -3.347473000 | -2.507443000 | 0.597945000  |
| H | -2.878996000 | -3.226351000 | -0.076569000 |
| H | -4.252083000 | -2.993997000 | 0.985004000  |
| C | -3.500940000 | 2.151820000  | 1.578024000  |
| H | -3.858945000 | 1.337169000  | 2.208455000  |
| H | -4.172315000 | 3.001801000  | 1.762297000  |
| C | -2.433697000 | -2.203096000 | 1.781976000  |
| H | -2.948302000 | -1.545694000 | 2.484145000  |
| H | -2.239982000 | -3.139579000 | 2.321821000  |
| C | -1.204543000 | 0.467216000  | 2.923215000  |
| H | -2.263905000 | 0.335022000  | 3.146357000  |
| H | -0.746751000 | 0.880491000  | 3.832612000  |
| O | -0.689198000 | 0.333802000  | -2.713122000 |
| H | -0.731661000 | 1.103501000  | -3.304345000 |
| H | -0.584782000 | -0.465068000 | -3.256864000 |
| C | -5.357722000 | -2.601322000 | -1.552110000 |

|   |              |              |              |
|---|--------------|--------------|--------------|
| C | -6.329772000 | -3.318796000 | -1.542007000 |
| H | -3.338036000 | -2.238285000 | -2.048604000 |
| H | -4.383252000 | -0.834472000 | -2.156083000 |
| H | -7.187579000 | -3.955359000 | -1.538441000 |

**-115°**

|   |              |              |              |
|---|--------------|--------------|--------------|
| Y | -1.523387000 | 0.210219000  | -0.477974000 |
| O | 0.723265000  | 0.374843000  | 0.036341000  |
| O | -0.906343000 | -1.905401000 | -1.295478000 |
| O | 7.324873000  | -0.706093000 | -0.815562000 |
| O | -1.259942000 | 2.462475000  | -1.060148000 |
| N | 6.231733000  | -0.234906000 | -0.330364000 |
| N | -1.092303000 | 1.453387000  | 1.803248000  |
| N | -3.616713000 | 1.710960000  | 0.153968000  |
| N | 2.505191000  | 1.209877000  | 1.171586000  |
| H | 2.806201000  | 1.833872000  | 1.913675000  |
| N | -1.131194000 | -1.550316000 | 1.421106000  |
| N | -3.705351000 | -1.300785000 | -0.201771000 |
| N | -1.987907000 | 4.556532000  | -1.484646000 |
| H | -1.064494000 | 4.844658000  | -1.788426000 |
| H | -2.730769000 | 5.243563000  | -1.506673000 |
| N | -0.020844000 | -3.972943000 | -1.084839000 |
| H | -0.095482000 | -4.139138000 | -2.082177000 |
| H | 0.367241000  | -4.708523000 | -0.508225000 |
| C | 0.274120000  | 2.021902000  | 1.730648000  |
| H | 0.680556000  | 2.233331000  | 2.727515000  |
| H | 0.231687000  | 2.970352000  | 1.186681000  |
| C | 3.555080000  | 0.496080000  | 0.428136000  |
| H | 3.028869000  | -0.173434000 | -0.253376000 |
| C | 1.204985000  | 1.127580000  | 0.927900000  |
| C | -0.403356000 | -2.809990000 | -0.579927000 |
| C | -3.610329000 | 2.878545000  | -0.758418000 |
| H | -4.195373000 | 3.715495000  | -0.356585000 |
| H | -4.072866000 | 2.587845000  | -1.707702000 |
| C | -2.193285000 | 3.305172000  | -1.102361000 |
| C | 5.542174000  | 0.807131000  | -1.164956000 |
| C | 4.433459000  | -0.294542000 | 1.401564000  |
| H | 4.886203000  | 0.409685000  | 2.111649000  |
| H | 3.824236000  | -0.993744000 | 1.984354000  |
| C | 4.425705000  | 1.489793000  | -0.347441000 |
| H | 3.809731000  | 2.083603000  | -1.031337000 |
| H | 4.878717000  | 2.186635000  | 0.369426000  |
| C | 5.551978000  | -1.092088000 | 0.699449000  |
| C | -2.089466000 | 2.552085000  | 1.994161000  |
| H | -1.754884000 | 3.417461000  | 1.420906000  |
| H | -2.115239000 | 2.868887000  | 3.045218000  |
| C | -0.173197000 | -2.552572000 | 0.898043000  |
| H | -0.195549000 | -3.482261000 | 1.479692000  |
| H | 0.839187000  | -2.143722000 | 0.969648000  |
| C | -0.557362000 | -0.882769000 | 2.630714000  |
| H | 0.516937000  | -0.768390000 | 2.481041000  |

|   |              |              |              |
|---|--------------|--------------|--------------|
| H | -0.679109000 | -1.521661000 | 3.515221000  |
| C | 4.986589000  | 0.149444000  | -2.446686000 |
| H | 5.779430000  | -0.422069000 | -2.937453000 |
| H | 4.635451000  | 0.923368000  | -3.137495000 |
| H | 4.149761000  | -0.525743000 | -2.244729000 |
| C | 6.595222000  | 1.860677000  | -1.547274000 |
| H | 7.055277000  | 2.291737000  | -0.651820000 |
| H | 6.116046000  | 2.666573000  | -2.112762000 |
| H | 7.380601000  | 1.417907000  | -2.162815000 |
| C | -4.174667000 | -1.732064000 | -1.560469000 |
| C | 6.611982000  | -1.486586000 | 1.741503000  |
| H | 6.139663000  | -2.067813000 | 2.540239000  |
| H | 7.069653000  | -0.596082000 | 2.185126000  |
| H | 7.398251000  | -2.090637000 | 1.284732000  |
| C | -4.875528000 | 0.922673000  | -0.029627000 |
| H | -5.109932000 | 0.911271000  | -1.096260000 |
| H | -5.716481000 | 1.417296000  | 0.474285000  |
| C | -4.760548000 | -0.504971000 | 0.493076000  |
| H | -4.539630000 | -0.504325000 | 1.561415000  |
| H | -5.735646000 | -0.997266000 | 0.381232000  |
| C | 5.001278000  | -2.365321000 | 0.021569000  |
| H | 4.660363000  | -3.072937000 | 0.784764000  |
| H | 5.793822000  | -2.839683000 | -0.563986000 |
| H | 4.158677000  | -2.156711000 | -0.644341000 |
| C | -3.345052000 | -2.508011000 | 0.599941000  |
| H | -2.876317000 | -3.226851000 | -0.074469000 |
| H | -4.249197000 | -2.995044000 | 0.987457000  |
| C | -3.501452000 | 2.151440000  | 1.578182000  |
| H | -3.858452000 | 1.336801000  | 2.209199000  |
| H | -4.173269000 | 3.001025000  | 1.762612000  |
| C | -2.431086000 | -2.202657000 | 1.783601000  |
| H | -2.945833000 | -1.545202000 | 2.485616000  |
| H | -2.236709000 | -3.138792000 | 2.323808000  |
| C | -1.203112000 | 0.469187000  | 2.922714000  |
| H | -2.262291000 | 0.336472000  | 3.146411000  |
| H | -0.745223000 | 0.883423000  | 3.831614000  |
| O | -0.682955000 | 0.330162000  | -2.719160000 |
| H | -0.863011000 | 1.064388000  | -3.330010000 |
| H | -0.644540000 | -0.489847000 | -3.240813000 |
| C | -5.354972000 | -2.604088000 | -1.550454000 |
| C | -6.326264000 | -3.322578000 | -1.540162000 |
| H | -3.335513000 | -2.239239000 | -2.046633000 |
| H | -4.382071000 | -0.836410000 | -2.154578000 |
| H | -7.183418000 | -3.960023000 | -1.536428000 |

**-125°**

|   |              |              |              |
|---|--------------|--------------|--------------|
| Y | -1.523100000 | 0.211616000  | -0.478433000 |
| O | 0.722647000  | 0.368777000  | 0.041339000  |
| O | -0.902919000 | -1.906575000 | -1.294522000 |
| O | 7.324714000  | -0.700731000 | -0.816697000 |
| O | -1.266523000 | 2.463193000  | -1.060525000 |

|   |              |              |              |
|---|--------------|--------------|--------------|
| N | 6.231252000  | -0.231133000 | -0.330687000 |
| N | -1.094538000 | 1.452368000  | 1.803178000  |
| N | -3.620321000 | 1.710421000  | 0.154099000  |
| N | 2.503892000  | 1.208957000  | 1.173810000  |
| H | 2.804480000  | 1.835163000  | 1.914220000  |
| N | -1.132552000 | -1.551406000 | 1.421723000  |
| N | -3.704701000 | -1.300426000 | -0.202700000 |
| N | -1.996319000 | 4.555131000  | -1.491789000 |
| H | -1.073369000 | 4.842796000  | -1.797347000 |
| H | -2.739638000 | 5.241593000  | -1.515366000 |
| N | -0.017913000 | -3.974149000 | -1.082209000 |
| H | -0.091036000 | -4.140452000 | -2.079661000 |
| H | 0.369193000  | -4.709768000 | -0.504954000 |
| C | 0.272074000  | 2.020524000  | 1.730839000  |
| H | 0.677574000  | 2.233849000  | 2.727696000  |
| H | 0.230129000  | 2.967909000  | 1.184931000  |
| C | 3.554372000  | 0.496362000  | 0.429994000  |
| H | 3.028636000  | -0.173645000 | -0.251378000 |
| C | 1.203756000  | 1.124584000  | 0.930723000  |
| C | -0.401102000 | -2.811342000 | -0.577942000 |
| C | -3.616568000 | 2.878548000  | -0.757514000 |
| H | -4.199954000 | 3.715499000  | -0.353207000 |
| H | -4.082290000 | 2.588930000  | -1.705546000 |
| C | -2.200413000 | 3.304948000  | -1.104823000 |
| C | 5.540003000  | 0.810506000  | -1.164360000 |
| C | 4.434308000  | -0.293510000 | 1.402580000  |
| H | 4.886840000  | 0.410962000  | 2.112547000  |
| H | 3.826334000  | -0.993605000 | 1.985600000  |
| C | 4.423260000  | 1.491441000  | -0.345806000 |
| H | 3.806070000  | 2.084744000  | -1.029044000 |
| H | 4.875919000  | 2.188570000  | 0.371008000  |
| C | 5.553094000  | -1.089576000 | 0.699176000  |
| C | -2.091673000 | 2.551323000  | 1.993424000  |
| H | -1.757187000 | 3.416155000  | 1.419300000  |
| H | -2.116989000 | 2.868871000  | 3.044262000  |
| C | -0.173455000 | -2.553372000 | 0.900190000  |
| H | -0.196129000 | -3.482949000 | 1.482016000  |
| H | 0.838659000  | -2.144080000 | 0.972973000  |
| C | -0.560437000 | -0.883711000 | 2.632004000  |
| H | 0.514100000  | -0.769647000 | 2.484034000  |
| H | -0.683732000 | -1.522300000 | 3.516518000  |
| C | 4.984338000  | 0.152875000  | -2.446080000 |
| H | 5.777511000  | -0.417432000 | -2.937711000 |
| H | 4.631820000  | 0.926781000  | -3.136207000 |
| H | 4.148429000  | -0.523386000 | -2.243921000 |
| C | 6.591587000  | 1.865477000  | -1.546806000 |
| H | 7.051674000  | 2.296671000  | -0.651433000 |
| H | 6.111119000  | 2.671068000  | -2.111632000 |
| H | 7.377114000  | 1.423931000  | -2.163038000 |
| C | -4.171855000 | -1.729129000 | -1.562810000 |
| C | 6.614293000  | -1.483644000 | 1.740165000  |
| H | 6.143178000  | -2.065782000 | 2.538947000  |

|   |              |              |              |
|---|--------------|--------------|--------------|
| H | 7.071459000  | -0.592949000 | 2.183926000  |
| H | 7.400786000  | -2.086664000 | 1.282417000  |
| C | -4.878250000 | 0.920837000  | -0.028953000 |
| H | -5.113249000 | 0.909670000  | -1.095465000 |
| H | -5.719561000 | 1.414124000  | 0.475709000  |
| C | -4.761323000 | -0.506908000 | 0.492568000  |
| H | -4.540737000 | -0.506921000 | 1.560966000  |
| H | -5.735598000 | -1.000650000 | 0.379902000  |
| C | 5.003147000  | -2.362920000 | 0.020901000  |
| H | 4.663537000  | -3.071389000 | 0.783886000  |
| H | 5.795733000  | -2.836087000 | -0.565564000 |
| H | 4.159828000  | -2.154747000 | -0.644245000 |
| C | -3.344846000 | -2.508811000 | 0.597380000  |
| H | -2.874904000 | -3.226396000 | -0.077523000 |
| H | -4.249282000 | -2.996877000 | 0.982899000  |
| C | -3.503929000 | 2.150377000  | 1.578376000  |
| H | -3.860206000 | 1.335443000  | 2.209423000  |
| H | -4.175810000 | 2.999695000  | 1.763825000  |
| C | -2.432516000 | -2.204328000 | 1.782457000  |
| H | -2.948205000 | -1.547510000 | 2.484372000  |
| H | -2.238568000 | -3.140816000 | 2.322215000  |
| C | -1.206169000 | 0.468505000  | 2.922868000  |
| H | -2.265484000 | 0.336050000  | 3.146033000  |
| H | -0.748736000 | 0.883028000  | 3.831869000  |
| O | -0.640572000 | 0.326702000  | -2.712955000 |
| H | -0.927662000 | 0.992463000  | -3.360623000 |
| H | -0.583951000 | -0.526539000 | -3.177545000 |
| C | -5.351812000 | -2.601667000 | -1.556369000 |
| C | -6.322767000 | -3.320642000 | -1.548916000 |
| H | -3.331739000 | -2.235167000 | -2.048565000 |
| H | -4.378650000 | -0.832493000 | -2.155661000 |
| H | -7.179638000 | -3.958476000 | -1.547657000 |

**-135°**

|   |              |              |              |
|---|--------------|--------------|--------------|
| Y | -1.523717000 | 0.212447000  | -0.479324000 |
| O | 0.721535000  | 0.363967000  | 0.043005000  |
| O | -0.898698000 | -1.908880000 | -1.292833000 |
| O | 7.325496000  | -0.697280000 | -0.815885000 |
| O | -1.267988000 | 2.465239000  | -1.056918000 |
| N | 6.231512000  | -0.228465000 | -0.330291000 |
| N | -1.096386000 | 1.452251000  | 1.801811000  |
| N | -3.622151000 | 1.710920000  | 0.152666000  |
| N | 2.502504000  | 1.208564000  | 1.172821000  |
| H | 2.802658000  | 1.836637000  | 1.911836000  |
| N | -1.134508000 | -1.551656000 | 1.422738000  |
| N | -3.705337000 | -1.299253000 | -0.203568000 |
| N | -1.998640000 | 4.555846000  | -1.493346000 |
| H | -1.075354000 | 4.843726000  | -1.797630000 |
| H | -2.742497000 | 5.241613000  | -1.519420000 |
| N | -0.016558000 | -3.977330000 | -1.076728000 |
| H | -0.087695000 | -4.144436000 | -2.074207000 |

|   |              |              |              |
|---|--------------|--------------|--------------|
| H | 0.368490000  | -4.712924000 | -0.498035000 |
| C | 0.270571000  | 2.019553000  | 1.729304000  |
| H | 0.675871000  | 2.233607000  | 2.726080000  |
| H | 0.229219000  | 2.966386000  | 1.182410000  |
| C | 3.553709000  | 0.496228000  | 0.429825000  |
| H | 3.028767000  | -0.175536000 | -0.250415000 |
| C | 1.202387000  | 1.122358000  | 0.930502000  |
| C | -0.399493000 | -2.813888000 | -0.574243000 |
| C | -3.618685000 | 2.878858000  | -0.759218000 |
| H | -4.203057000 | 3.715452000  | -0.355566000 |
| H | -4.083411000 | 2.588689000  | -1.707556000 |
| C | -2.202357000 | 3.306033000  | -1.104693000 |
| C | 5.538659000  | 0.811010000  | -1.165319000 |
| C | 4.434971000  | -0.290908000 | 1.403405000  |
| H | 4.886624000  | 0.415295000  | 2.112214000  |
| H | 3.828167000  | -0.991015000 | 1.987628000  |
| C | 4.421041000  | 1.491445000  | -0.347569000 |
| H | 3.802868000  | 2.082902000  | -1.031517000 |
| H | 4.872773000  | 2.190204000  | 0.368234000  |
| C | 5.554750000  | -1.086373000 | 0.700926000  |
| C | -2.093039000 | 2.551840000  | 1.991755000  |
| H | -1.758118000 | 3.416462000  | 1.417645000  |
| H | -2.118197000 | 2.869355000  | 3.042592000  |
| C | -0.174877000 | -2.554430000 | 0.903900000  |
| H | -0.198662000 | -3.483306000 | 1.486802000  |
| H | 0.837218000  | -2.145264000 | 0.977757000  |
| C | -0.563614000 | -0.883235000 | 2.633194000  |
| H | 0.511139000  | -0.769745000 | 2.486406000  |
| H | -0.688280000 | -1.521061000 | 3.518064000  |
| C | 4.983731000  | 0.150832000  | -2.446055000 |
| H | 5.777624000  | -0.419021000 | -2.937050000 |
| H | 4.630001000  | 0.923294000  | -3.137173000 |
| H | 4.148812000  | -0.526318000 | -2.242811000 |
| C | 6.588655000  | 1.866981000  | -1.549382000 |
| H | 7.048244000  | 2.300084000  | -0.654675000 |
| H | 6.106946000  | 2.671092000  | -2.115261000 |
| H | 7.374731000  | 1.425718000  | -2.165115000 |
| C | -4.171573000 | -1.727071000 | -1.564360000 |
| C | 6.616680000  | -1.477419000 | 1.742318000  |
| H | 6.146520000  | -2.059073000 | 2.542013000  |
| H | 7.072614000  | -0.585417000 | 2.184729000  |
| H | 7.403989000  | -2.079947000 | 1.285331000  |
| C | -4.880056000 | 0.921316000  | -0.029892000 |
| H | -5.115626000 | 0.910196000  | -1.096283000 |
| H | -5.721207000 | 1.414405000  | 0.475212000  |
| C | -4.762559000 | -0.506400000 | 0.491508000  |
| H | -4.542283000 | -0.506387000 | 1.559973000  |
| H | -5.736514000 | -1.000686000 | 0.378481000  |
| C | 5.006491000  | -2.361440000 | 0.024536000  |
| H | 4.668054000  | -3.069361000 | 0.788552000  |
| H | 5.799655000  | -2.834247000 | -0.561440000 |
| H | 4.162727000  | -2.155390000 | -0.640726000 |



|   |              |              |              |
|---|--------------|--------------|--------------|
| C | -3.346029000 | -2.508111000 | 0.596046000  |
| H | -2.875143000 | -3.225122000 | -0.078808000 |
| H | -4.250767000 | -2.996630000 | 0.980257000  |
| C | -3.505509000 | 2.151353000  | 1.576802000  |
| H | -3.862138000 | 1.336781000  | 2.208129000  |
| H | -4.177036000 | 3.000996000  | 1.761984000  |
| C | -2.435088000 | -2.203922000 | 1.782215000  |
| H | -2.951304000 | -1.546740000 | 2.483395000  |
| H | -2.242205000 | -3.140392000 | 2.322370000  |
| C | -1.209068000 | 0.469357000  | 2.922255000  |
| H | -2.268587000 | 0.337450000  | 3.144731000  |
| H | -0.752211000 | 0.884652000  | 3.831191000  |
| O | -0.612495000 | 0.322114000  | -2.714478000 |
| H | -0.999572000 | 0.897633000  | -3.396130000 |
| H | -0.510248000 | -0.560245000 | -3.113987000 |
| C | -5.351067000 | -2.600183000 | -1.559181000 |
| C | -6.321499000 | -3.319864000 | -1.552547000 |
| H | -3.330939000 | -2.232414000 | -2.050012000 |
| H | -4.378390000 | -0.830072000 | -2.156634000 |
| H | -7.177942000 | -3.958277000 | -1.551985000 |

**-145°**

|   |              |              |              |
|---|--------------|--------------|--------------|
| Y | -1.525220000 | 0.213670000  | -0.479501000 |
| O | 0.720015000  | 0.359675000  | 0.042456000  |
| O | -0.894607000 | -1.910672000 | -1.290853000 |
| O | 7.327207000  | -0.693698000 | -0.814504000 |
| O | -1.266836000 | 2.467643000  | -1.049966000 |
| N | 6.232330000  | -0.226190000 | -0.329674000 |
| N | -1.097956000 | 1.451948000  | 1.800980000  |
| N | -3.622958000 | 1.712127000  | 0.151000000  |
| N | 2.500906000  | 1.206584000  | 1.171026000  |
| H | 2.800661000  | 1.835556000  | 1.909459000  |
| N | -1.136677000 | -1.551496000 | 1.423959000  |
| N | -3.706117000 | -1.297907000 | -0.204767000 |
| N | -1.997664000 | 4.556398000  | -1.495029000 |
| H | -1.073656000 | 4.844220000  | -1.797099000 |
| H | -2.742053000 | 5.241384000  | -1.525357000 |
| N | -0.015132000 | -3.979938000 | -1.071199000 |
| H | -0.084101000 | -4.147670000 | -2.068746000 |
| H | 0.367987000  | -4.715508000 | -0.491164000 |
| C | 0.269511000  | 2.017768000  | 1.727402000  |
| H | 0.675359000  | 2.232194000  | 2.723879000  |
| H | 0.228670000  | 2.964190000  | 1.179802000  |
| C | 3.553024000  | 0.494941000  | 0.428641000  |
| H | 3.029111000  | -0.177873000 | -0.251343000 |
| C | 1.200894000  | 1.119521000  | 0.929034000  |
| C | -0.398009000 | -2.815967000 | -0.570366000 |
| C | -3.618547000 | 2.879936000  | -0.761183000 |
| H | -4.203894000 | 3.716376000  | -0.358600000 |
| H | -4.081606000 | 2.589392000  | -1.710196000 |
| C | -2.201485000 | 3.307383000  | -1.103530000 |

|   |              |              |              |
|---|--------------|--------------|--------------|
| C | 5.538391000  | 0.811802000  | -1.165635000 |
| C | 4.434957000  | -0.290356000 | 1.403088000  |
| H | 4.885214000  | 0.416967000  | 2.111672000  |
| H | 3.828907000  | -0.990981000 | 1.987468000  |
| C | 4.419313000  | 1.490979000  | -0.348873000 |
| H | 3.800644000  | 2.081198000  | -1.033435000 |
| H | 4.869628000  | 2.190746000  | 0.366835000  |
| C | 5.556266000  | -1.084542000 | 0.701643000  |
| C | -2.093818000 | 2.552438000  | 1.990665000  |
| H | -1.757965000 | 3.417039000  | 1.417200000  |
| H | -2.119224000 | 2.869398000  | 3.041645000  |
| C | -0.176592000 | -2.555201000 | 0.907790000  |
| H | -0.201677000 | -3.483425000 | 1.491653000  |
| H | 0.835534000  | -2.146322000 | 0.982880000  |
| C | -0.566807000 | -0.882803000 | 2.634745000  |
| H | 0.508170000  | -0.769987000 | 2.489041000  |
| H | -0.692787000 | -1.520109000 | 3.519794000  |
| C | 4.985132000  | 0.150123000  | -2.446314000 |
| H | 5.780104000  | -0.418878000 | -2.936548000 |
| H | 4.630686000  | 0.921682000  | -3.138067000 |
| H | 4.151058000  | -0.528087000 | -2.243127000 |
| C | 6.587023000  | 1.869165000  | -1.549619000 |
| H | 7.045394000  | 2.303443000  | -0.654855000 |
| H | 6.104449000  | 2.672244000  | -2.116223000 |
| H | 7.374143000  | 1.428759000  | -2.164625000 |
| C | -4.171596000 | -1.725545000 | -1.565947000 |
| C | 6.618173000  | -1.473451000 | 1.743871000  |
| H | 6.148407000  | -2.055347000 | 2.543621000  |
| H | 7.072516000  | -0.580522000 | 2.186061000  |
| H | 7.406648000  | -2.075050000 | 1.287682000  |
| C | -4.880967000 | 0.922816000  | -0.031761000 |
| H | -5.116358000 | 0.911755000  | -1.098192000 |
| H | -5.722159000 | 1.416009000  | 0.473163000  |
| C | -4.763774000 | -0.504966000 | 0.489693000  |
| H | -4.544154000 | -0.504931000 | 1.558289000  |
| H | -5.737643000 | -0.999282000 | 0.376088000  |
| C | 5.010199000  | -2.360712000 | 0.025593000  |
| H | 4.672504000  | -3.068825000 | 0.789761000  |
| H | 5.804320000  | -2.832563000 | -0.559855000 |
| H | 4.166383000  | -2.156184000 | -0.640093000 |
| C | -3.347536000 | -2.507006000 | 0.594912000  |
| H | -2.875851000 | -3.223722000 | -0.079720000 |
| H | -4.252699000 | -2.995689000 | 0.977878000  |
| C | -3.506483000 | 2.152964000  | 1.575073000  |
| H | -3.864001000 | 1.338842000  | 2.206481000  |
| H | -4.177451000 | 3.003155000  | 1.759723000  |
| C | -2.437954000 | -2.203099000 | 1.782148000  |
| H | -2.954644000 | -1.545576000 | 2.482652000  |
| H | -2.246137000 | -3.139576000 | 2.322651000  |
| C | -1.211598000 | 0.470282000  | 2.922297000  |
| H | -2.271288000 | 0.339227000  | 3.144444000  |
| H | -0.754896000 | 0.886244000  | 3.831003000  |

|   |              |              |              |
|---|--------------|--------------|--------------|
| O | -0.596054000 | 0.318853000  | -2.719534000 |
| H | -1.076755000 | 0.786643000  | -3.424470000 |
| H | -0.441823000 | -0.585807000 | -3.048137000 |
| C | -5.350544000 | -2.599314000 | -1.561465000 |
| C | -6.320430000 | -3.319729000 | -1.555349000 |
| H | -3.330430000 | -2.230303000 | -2.051364000 |
| H | -4.378631000 | -0.828486000 | -2.158025000 |
| H | -7.176419000 | -3.958754000 | -1.555240000 |

**-155°**

|   |              |              |              |
|---|--------------|--------------|--------------|
| Y | -1.526666000 | 0.214444000  | -0.482425000 |
| O | 0.716813000  | 0.352242000  | 0.052528000  |
| O | -0.875518000 | -1.910294000 | -1.290124000 |
| O | 7.320907000  | -0.690337000 | -0.817717000 |
| O | -1.261948000 | 2.472958000  | -1.038421000 |
| N | 6.226760000  | -0.223543000 | -0.330541000 |
| N | -1.105026000 | 1.450099000  | 1.801762000  |
| N | -3.624521000 | 1.711593000  | 0.143790000  |
| N | 2.496525000  | 1.205521000  | 1.177453000  |
| H | 2.796032000  | 1.836799000  | 1.913991000  |
| N | -1.143992000 | -1.552992000 | 1.425186000  |
| N | -3.707156000 | -1.297327000 | -0.212456000 |
| N | -1.995890000 | 4.558328000  | -1.494248000 |
| H | -1.070483000 | 4.848355000  | -1.789783000 |
| H | -2.742266000 | 5.240732000  | -1.532305000 |
| N | -0.008982000 | -3.983939000 | -1.061021000 |
| H | -0.070322000 | -4.152108000 | -2.058995000 |
| H | 0.364559000  | -4.721367000 | -0.477124000 |
| C | 0.263643000  | 2.013928000  | 1.733257000  |
| H | 0.666699000  | 2.226254000  | 2.731326000  |
| H | 0.225878000  | 2.961215000  | 1.186983000  |
| C | 3.548665000  | 0.494699000  | 0.434314000  |
| H | 3.024624000  | -0.180613000 | -0.243060000 |
| C | 1.196355000  | 1.115368000  | 0.936707000  |
| C | -0.390803000 | -2.817931000 | -0.564250000 |
| C | -3.617330000 | 2.878366000  | -0.769809000 |
| H | -4.207844000 | 3.713563000  | -0.372219000 |
| H | -4.073009000 | 2.585176000  | -1.721560000 |
| C | -2.198784000 | 3.309252000  | -1.101920000 |
| C | 5.528845000  | 0.811899000  | -1.166350000 |
| C | 4.434650000  | -0.287102000 | 1.407821000  |
| H | 4.885950000  | 0.422303000  | 2.113661000  |
| H | 3.831512000  | -0.987570000 | 1.995401000  |
| C | 4.411064000  | 1.490766000  | -0.347500000 |
| H | 3.789426000  | 2.078730000  | -1.031323000 |
| H | 4.862312000  | 2.192524000  | 0.365653000  |
| C | 5.554999000  | -1.080957000 | 0.704408000  |
| C | -2.100005000 | 2.551979000  | 1.988215000  |
| H | -1.761052000 | 3.416404000  | 1.416497000  |
| H | -2.128792000 | 2.868328000  | 3.039289000  |
| C | -0.180773000 | -2.556988000 | 0.915303000  |

|   |              |              |              |
|---|--------------|--------------|--------------|
| H | -0.209728000 | -3.484883000 | 1.499512000  |
| H | 0.830853000  | -2.148105000 | 0.996795000  |
| C | -0.579555000 | -0.884247000 | 2.638610000  |
| H | 0.496106000  | -0.771887000 | 2.497927000  |
| H | -0.710094000 | -1.521450000 | 3.523055000  |
| C | 4.972878000  | 0.147155000  | -2.444297000 |
| H | 5.767430000  | -0.420920000 | -2.936282000 |
| H | 4.614588000  | 0.916962000  | -3.136017000 |
| H | 4.140939000  | -0.532517000 | -2.237412000 |
| C | 6.574709000  | 1.870133000  | -1.555416000 |
| H | 7.034992000  | 2.306915000  | -0.662864000 |
| H | 6.089248000  | 2.671308000  | -2.122254000 |
| H | 7.360717000  | 1.429714000  | -2.171842000 |
| C | -4.171492000 | -1.722807000 | -1.574771000 |
| C | 6.620646000  | -1.466498000 | 1.744044000  |
| H | 6.154157000  | -2.047630000 | 2.546259000  |
| H | 7.075066000  | -0.572134000 | 2.183243000  |
| H | 7.408588000  | -2.067773000 | 1.286498000  |
| C | -4.882687000 | 0.922961000  | -0.040417000 |
| H | -5.117490000 | 0.912339000  | -1.106965000 |
| H | -5.724069000 | 1.416294000  | 0.464007000  |
| C | -4.765955000 | -0.504853000 | 0.481108000  |
| H | -4.547828000 | -0.504975000 | 1.549984000  |
| H | -5.739424000 | -0.999594000 | 0.366085000  |
| C | 5.008781000  | -2.359097000 | 0.032209000  |
| H | 4.674271000  | -3.066348000 | 0.798577000  |
| H | 5.801895000  | -2.830833000 | -0.554699000 |
| H | 4.162777000  | -2.156956000 | -0.631443000 |
| C | -3.350421000 | -2.507753000 | 0.585997000  |
| H | -2.874556000 | -3.222111000 | -0.088329000 |
| H | -4.256636000 | -2.998599000 | 0.963624000  |
| C | -3.511702000 | 2.154144000  | 1.567865000  |
| H | -3.872510000 | 1.341180000  | 2.198883000  |
| H | -4.182177000 | 3.005409000  | 1.749195000  |
| C | -2.446519000 | -2.204866000 | 1.777580000  |
| H | -2.966233000 | -1.547824000 | 2.476278000  |
| H | -2.257121000 | -3.141701000 | 2.318287000  |
| C | -1.224579000 | 0.469119000  | 2.922848000  |
| H | -2.285347000 | 0.338997000  | 3.140340000  |
| H | -0.771616000 | 0.885122000  | 3.833403000  |
| O | -0.507685000 | 0.327803000  | -2.707668000 |
| H | -1.044389000 | 0.675094000  | -3.441933000 |
| H | -0.279256000 | -0.586221000 | -2.959400000 |
| C | -5.349936000 | -2.597213000 | -1.572504000 |
| C | -6.319342000 | -3.318270000 | -1.567701000 |
| H | -3.329727000 | -2.226489000 | -2.060498000 |
| H | -4.378412000 | -0.824936000 | -2.165587000 |
| H | -7.174982000 | -3.957768000 | -1.568661000 |

**-165°**

|   |              |             |              |
|---|--------------|-------------|--------------|
| Y | -1.527774000 | 0.215282000 | -0.485154000 |
|---|--------------|-------------|--------------|

|   |              |              |              |
|---|--------------|--------------|--------------|
| O | 0.715300000  | 0.346883000  | 0.051246000  |
| O | -0.862719000 | -1.910716000 | -1.288602000 |
| O | 7.323372000  | -0.682459000 | -0.817520000 |
| O | -1.263736000 | 2.476600000  | -1.031198000 |
| N | 6.227911000  | -0.219073000 | -0.330053000 |
| N | -1.107845000 | 1.446719000  | 1.801584000  |
| N | -3.626832000 | 1.711809000  | 0.143597000  |
| N | 2.494098000  | 1.198940000  | 1.178873000  |
| H | 2.792687000  | 1.829361000  | 1.916541000  |
| N | -1.147041000 | -1.555437000 | 1.425471000  |
| N | -3.709121000 | -1.295851000 | -0.216305000 |
| N | -1.998747000 | 4.561342000  | -1.488557000 |
| H | -1.072812000 | 4.852820000  | -1.780943000 |
| H | -2.745959000 | 5.242701000  | -1.528551000 |
| N | -0.004888000 | -3.987476000 | -1.055459000 |
| H | -0.061320000 | -4.155018000 | -2.053822000 |
| H | 0.363691000  | -4.726091000 | -0.469931000 |
| C | 0.261869000  | 2.008026000  | 1.733737000  |
| H | 0.664998000  | 2.218930000  | 2.732070000  |
| H | 0.225771000  | 2.955794000  | 1.188195000  |
| C | 3.547750000  | 0.491242000  | 0.434927000  |
| H | 3.025382000  | -0.184541000 | -0.243278000 |
| C | 1.194244000  | 1.109240000  | 0.936782000  |
| C | -0.385398000 | -2.820244000 | -0.560381000 |
| C | -3.620010000 | 2.878483000  | -0.770099000 |
| H | -4.213314000 | 3.712485000  | -0.374159000 |
| H | -4.072483000 | 2.584146000  | -1.723019000 |
| C | -2.201189000 | 3.311631000  | -1.097644000 |
| C | 5.527683000  | 0.815734000  | -1.164695000 |
| C | 4.435471000  | -0.289451000 | 1.407698000  |
| H | 4.884778000  | 0.420348000  | 2.114418000  |
| H | 3.834047000  | -0.992141000 | 1.994381000  |
| C | 4.407854000  | 1.490543000  | -0.345369000 |
| H | 3.784893000  | 2.077835000  | -1.028558000 |
| H | 4.857007000  | 2.192497000  | 0.368918000  |
| C | 5.558008000  | -1.079536000 | 0.703581000  |
| C | -2.101106000 | 2.550269000  | 1.988142000  |
| H | -1.760704000 | 3.414508000  | 1.417143000  |
| H | -2.129631000 | 2.865852000  | 3.039443000  |
| C | -0.182093000 | -2.559860000 | 0.919844000  |
| H | -0.213803000 | -3.487565000 | 1.504220000  |
| H | 0.829356000  | -2.151353000 | 1.005383000  |
| C | -0.585740000 | -0.887177000 | 2.640466000  |
| H | 0.490386000  | -0.775388000 | 2.502662000  |
| H | -0.718961000 | -1.524321000 | 3.524564000  |
| C | 4.973788000  | 0.151434000  | -2.443761000 |
| H | 5.769839000  | -0.414080000 | -2.936267000 |
| H | 4.613919000  | 0.921357000  | -3.134538000 |
| H | 4.143337000  | -0.530425000 | -2.238046000 |
| C | 6.570950000  | 1.877266000  | -1.551804000 |
| H | 7.029710000  | 2.313960000  | -0.658418000 |
| H | 6.083627000  | 2.678006000  | -2.117658000 |

|   |              |              |              |
|---|--------------|--------------|--------------|
| H | 7.358358000  | 1.439816000  | -2.168547000 |
| C | -4.175765000 | -1.717587000 | -1.579181000 |
| C | 6.624339000  | -1.463711000 | 1.743020000  |
| H | 6.159111000  | -2.047012000 | 2.544390000  |
| H | 7.076383000  | -0.568748000 | 2.183457000  |
| H | 7.413915000  | -2.062407000 | 1.284918000  |
| C | -4.885235000 | 0.923609000  | -0.039587000 |
| H | -5.122160000 | 0.914493000  | -1.105666000 |
| H | -5.725784000 | 1.416163000  | 0.466982000  |
| C | -4.767246000 | -0.504725000 | 0.479973000  |
| H | -4.547726000 | -0.506107000 | 1.548533000  |
| H | -5.740582000 | -0.999897000 | 0.365598000  |
| C | 5.015220000  | -2.358112000 | 0.029460000  |
| H | 4.682303000  | -3.067319000 | 0.794708000  |
| H | 5.809707000  | -2.826983000 | -0.557885000 |
| H | 4.168882000  | -2.157169000 | -0.634143000 |
| C | -3.351821000 | -2.508075000 | 0.579116000  |
| H | -2.873544000 | -3.219563000 | -0.096602000 |
| H | -4.258000000 | -3.001406000 | 0.953587000  |
| C | -3.513370000 | 2.154560000  | 1.567524000  |
| H | -3.875395000 | 1.342218000  | 2.198666000  |
| H | -4.182643000 | 3.006781000  | 1.748752000  |
| C | -2.450726000 | -2.207275000 | 1.773441000  |
| H | -2.971917000 | -1.551174000 | 2.471918000  |
| H | -2.263184000 | -3.145080000 | 2.313099000  |
| C | -1.230226000 | 0.466472000  | 2.922905000  |
| H | -2.291499000 | 0.337215000  | 3.138405000  |
| H | -0.778675000 | 0.882720000  | 3.834057000  |
| O | -0.484349000 | 0.335735000  | -2.711141000 |
| H | -1.075364000 | 0.546362000  | -3.456046000 |
| H | -0.163270000 | -0.567054000 | -2.894852000 |
| C | -5.352921000 | -2.593636000 | -1.577600000 |
| C | -6.321131000 | -3.316292000 | -1.573670000 |
| H | -3.334293000 | -2.218519000 | -2.068419000 |
| H | -4.384949000 | -0.818042000 | -2.166538000 |
| H | -7.175808000 | -3.957079000 | -1.575386000 |

**-175°**

|   |              |              |              |
|---|--------------|--------------|--------------|
| Y | -1.527870000 | 0.215235000  | -0.487905000 |
| O | 0.714563000  | 0.348747000  | 0.045124000  |
| O | -0.858030000 | -1.912406000 | -1.285410000 |
| O | 7.325136000  | -0.680423000 | -0.815330000 |
| O | -1.263551000 | 2.479525000  | -1.023428000 |
| N | 6.228791000  | -0.218256000 | -0.328714000 |
| N | -1.108865000 | 1.445642000  | 1.800893000  |
| N | -3.627960000 | 1.712134000  | 0.142601000  |
| N | 2.492705000  | 1.196036000  | 1.177550000  |
| H | 2.790699000  | 1.824006000  | 1.917571000  |
| N | -1.148537000 | -1.555443000 | 1.426913000  |
| N | -3.710563000 | -1.294348000 | -0.217699000 |
| N | -1.998653000 | 4.563860000  | -1.483060000 |
| H | -1.071953000 | 4.856454000  | -1.771829000 |

|   |              |              |              |
|---|--------------|--------------|--------------|
| H | -2.746447000 | 5.244420000  | -1.525457000 |
| N | -0.007634000 | -3.991837000 | -1.048984000 |
| H | -0.063093000 | -4.160117000 | -2.047258000 |
| H | 0.357662000  | -4.731034000 | -0.462179000 |
| C | 0.261211000  | 2.006012000  | 1.732425000  |
| H | 0.665263000  | 2.215583000  | 2.730644000  |
| H | 0.225248000  | 2.954357000  | 1.187921000  |
| C | 3.547289000  | 0.489665000  | 0.433613000  |
| H | 3.025962000  | -0.185432000 | -0.246089000 |
| C | 1.193220000  | 1.108278000  | 0.933693000  |
| C | -0.385321000 | -2.822727000 | -0.555666000 |
| C | -3.620674000 | 2.878805000  | -0.770990000 |
| H | -4.216444000 | 3.711855000  | -0.376715000 |
| H | -4.069873000 | 2.583721000  | -1.725222000 |
| C | -2.201267000 | 3.313644000  | -1.093466000 |
| C | 5.529086000  | 0.817219000  | -1.162961000 |
| C | 4.434122000  | -0.291806000 | 1.406573000  |
| H | 4.882066000  | 0.417421000  | 2.114728000  |
| H | 3.832297000  | -0.995530000 | 1.991603000  |
| C | 4.407912000  | 1.490450000  | -0.344219000 |
| H | 3.785570000  | 2.078393000  | -1.027403000 |
| H | 4.855817000  | 2.191644000  | 0.371597000  |
| C | 5.558065000  | -1.080356000 | 0.703005000  |
| C | -2.101640000 | 2.549719000  | 1.987446000  |
| H | -1.760710000 | 3.414205000  | 1.417292000  |
| H | -2.130386000 | 2.864548000  | 3.038964000  |
| C | -0.183773000 | -2.561479000 | 0.924412000  |
| H | -0.217553000 | -3.488378000 | 1.509987000  |
| H | 0.828028000  | -2.154082000 | 1.011205000  |
| C | -0.588030000 | -0.887044000 | 2.641980000  |
| H | 0.488237000  | -0.775440000 | 2.504611000  |
| H | -0.721758000 | -1.523839000 | 3.526276000  |
| C | 4.977073000  | 0.154200000  | -2.443485000 |
| H | 5.773899000  | -0.410638000 | -2.935507000 |
| H | 4.617994000  | 0.924793000  | -3.133931000 |
| H | 4.146445000  | -0.528010000 | -2.239591000 |
| C | 6.572311000  | 1.879767000  | -1.547394000 |
| H | 7.029687000  | 2.315559000  | -0.652855000 |
| H | 6.085303000  | 2.680982000  | -2.112843000 |
| H | 7.360740000  | 1.443506000  | -2.163668000 |
| C | -4.177550000 | -1.715376000 | -1.580821000 |
| C | 6.623267000  | -1.465072000 | 1.743402000  |
| H | 6.157373000  | -2.049620000 | 2.543475000  |
| H | 7.074149000  | -0.570333000 | 2.185482000  |
| H | 7.413830000  | -2.062712000 | 1.285627000  |
| C | -4.886782000 | 0.924841000  | -0.040332000 |
| H | -5.124356000 | 0.916349000  | -1.106277000 |
| H | -5.726893000 | 1.417512000  | 0.466867000  |
| C | -4.768939000 | -0.503669000 | 0.478669000  |
| H | -4.549711000 | -0.505323000 | 1.547273000  |
| H | -5.742160000 | -0.998974000 | 0.363878000  |
| C | 5.016917000  | -2.358446000 | 0.026668000  |

|   |              |              |              |
|---|--------------|--------------|--------------|
| H | 4.683552000  | -3.068814000 | 0.790637000  |
| H | 5.812394000  | -2.826086000 | -0.560313000 |
| H | 4.171235000  | -2.157193000 | -0.637676000 |
| C | -3.353103000 | -2.506647000 | 0.577523000  |
| H | -2.873697000 | -3.217535000 | -0.098031000 |
| H | -4.259338000 | -3.000686000 | 0.950928000  |
| C | -3.514051000 | 2.154723000  | 1.566477000  |
| H | -3.876477000 | 1.342528000  | 2.197576000  |
| H | -4.182890000 | 3.007271000  | 1.747855000  |
| C | -2.453457000 | -2.205741000 | 1.773030000  |
| H | -2.975160000 | -1.548917000 | 2.470415000  |
| H | -2.267643000 | -3.143461000 | 2.313443000  |
| C | -1.232034000 | 0.466781000  | 2.923164000  |
| H | -2.293431000 | 0.338138000  | 3.138412000  |
| H | -0.780652000 | 0.883784000  | 3.834056000  |
| O | -0.479101000 | 0.343126000  | -2.721848000 |
| H | -1.111118000 | 0.403356000  | -3.461197000 |
| H | -0.042399000 | -0.519775000 | -2.849147000 |
| C | -5.353437000 | -2.593070000 | -1.579637000 |
| C | -6.320594000 | -3.317132000 | -1.576352000 |
| H | -3.335585000 | -2.214425000 | -2.071209000 |
| H | -4.388420000 | -0.815414000 | -2.166896000 |
| H | -7.174398000 | -3.959081000 | -1.578639000 |

### 175°

|   |              |              |              |
|---|--------------|--------------|--------------|
| Y | -1.527352000 | 0.215362000  | -0.491578000 |
| O | 0.714760000  | 0.351996000  | 0.036149000  |
| O | -0.871292000 | -1.917260000 | -1.281973000 |
| O | 7.327283000  | -0.682784000 | -0.811069000 |
| O | -1.262223000 | 2.484684000  | -1.016137000 |
| N | 6.230131000  | -0.220601000 | -0.326314000 |
| N | -1.108597000 | 1.445695000  | 1.798741000  |
| N | -3.628310000 | 1.712856000  | 0.139872000  |
| N | 2.491995000  | 1.193851000  | 1.174148000  |
| H | 2.789356000  | 1.819500000  | 1.916411000  |
| N | -1.150679000 | -1.553292000 | 1.428372000  |
| N | -3.712305000 | -1.292828000 | -0.217370000 |
| N | -1.997764000 | 4.569571000  | -1.473513000 |
| H | -1.070298000 | 4.864266000  | -1.757583000 |
| H | -2.746368000 | 5.249134000  | -1.517199000 |
| N | -0.025317000 | -3.998476000 | -1.044151000 |
| H | -0.085818000 | -4.169412000 | -2.041642000 |
| H | 0.341242000  | -4.736652000 | -0.456924000 |
| C | 0.261312000  | 2.006198000  | 1.727432000  |
| H | 0.666930000  | 2.216634000  | 2.724804000  |
| H | 0.224197000  | 2.953957000  | 1.182039000  |
| C | 3.547397000  | 0.487551000  | 0.431294000  |
| H | 3.026960000  | -0.187074000 | -0.249597000 |
| C | 1.192972000  | 1.108690000  | 0.927861000  |
| C | -0.397730000 | -2.826572000 | -0.552438000 |
| C | -3.620285000 | 2.879975000  | -0.773022000 |



|   |              |              |              |
|---|--------------|--------------|--------------|
| H | -4.219943000 | 3.711276000  | -0.380966000 |
| H | -4.064536000 | 2.584056000  | -1.729303000 |
| C | -2.200291000 | 3.317739000  | -1.088381000 |
| C | 5.532029000  | 0.815187000  | -1.161535000 |
| C | 4.432317000  | -0.294372000 | 1.405646000  |
| H | 4.878994000  | 0.414687000  | 2.114768000  |
| H | 3.829318000  | -0.998138000 | 1.989409000  |
| C | 4.409656000  | 1.488488000  | -0.344543000 |
| H | 3.788735000  | 2.076966000  | -1.028553000 |
| H | 4.856516000  | 2.189209000  | 0.372380000  |
| C | 5.557500000  | -1.082835000 | 0.704043000  |
| C | -2.101771000 | 2.549478000  | 1.985595000  |
| H | -1.760871000 | 3.414773000  | 1.416833000  |
| H | -2.131081000 | 2.863049000  | 3.037460000  |
| C | -0.189110000 | -2.562261000 | 0.926079000  |
| H | -0.222830000 | -3.487528000 | 1.514311000  |
| H | 0.823661000  | -2.156387000 | 1.008657000  |
| C | -0.587374000 | -0.885283000 | 2.641937000  |
| H | 0.488757000  | -0.774454000 | 2.502292000  |
| H | -0.719714000 | -1.521581000 | 3.526840000  |
| C | 4.981932000  | 0.152485000  | -2.443031000 |
| H | 5.779306000  | -0.412857000 | -2.933576000 |
| H | 4.624580000  | 0.923260000  | -3.134166000 |
| H | 4.150498000  | -0.529206000 | -2.240591000 |
| C | 6.576105000  | 1.877620000  | -1.543980000 |
| H | 7.032112000  | 2.313040000  | -0.648560000 |
| H | 6.090215000  | 2.679121000  | -2.109982000 |
| H | 7.365446000  | 1.441353000  | -2.159072000 |
| C | -4.175732000 | -1.716934000 | -1.580697000 |
| C | 6.620744000  | -1.467686000 | 1.746394000  |
| H | 6.153349000  | -2.052279000 | 2.545559000  |
| H | 7.070854000  | -0.573006000 | 2.189386000  |
| H | 7.412110000  | -2.065329000 | 1.290024000  |
| C | -4.887726000 | 0.926999000  | -0.044421000 |
| H | -5.123622000 | 0.918320000  | -1.110767000 |
| H | -5.728070000 | 1.420856000  | 0.461288000  |
| C | -4.772247000 | -0.501304000 | 0.475345000  |
| H | -4.555894000 | -0.502390000 | 1.544546000  |
| H | -5.745429000 | -0.996138000 | 0.358214000  |
| C | 5.017459000  | -2.360794000 | 0.026575000  |
| H | 4.682543000  | -3.071183000 | 0.789840000  |
| H | 5.813964000  | -2.828501000 | -0.558947000 |
| H | 4.173052000  | -2.159300000 | -0.639317000 |
| C | -3.356840000 | -2.503282000 | 0.581474000  |
| H | -2.878691000 | -3.217194000 | -0.091647000 |
| H | -4.263919000 | -2.994605000 | 0.956419000  |
| C | -3.514155000 | 2.154450000  | 1.563949000  |
| H | -3.876472000 | 1.341837000  | 2.194566000  |
| H | -4.183000000 | 3.006889000  | 1.746003000  |
| C | -2.456791000 | -2.200103000 | 1.776136000  |
| H | -2.977602000 | -1.540538000 | 2.471555000  |
| H | -2.272564000 | -3.136567000 | 2.319335000  |

|   |              |              |              |
|---|--------------|--------------|--------------|
| C | -1.230022000 | 0.468976000  | 2.922921000  |
| H | -2.291078000 | 0.341207000  | 3.140380000  |
| H | -0.776696000 | 0.887277000  | 3.832230000  |
| O | -0.463721000 | 0.355493000  | -2.723074000 |
| H | -1.094594000 | 0.261624000  | -3.460210000 |
| H | 0.112149000  | -0.426975000 | -2.804686000 |
| C | -5.351358000 | -2.595023000 | -1.580693000 |
| C | -6.318286000 | -3.319408000 | -1.578563000 |
| H | -3.332205000 | -2.216593000 | -2.067713000 |
| H | -4.385712000 | -0.818205000 | -2.169067000 |
| H | -7.171857000 | -3.961656000 | -1.581860000 |

**-55°**

symmetry c1

|   |              |              |              |
|---|--------------|--------------|--------------|
| Y | -1.533127000 | 0.210315000  | -0.477872000 |
| O | 0.719198000  | 0.387524000  | 0.017802000  |
| O | -0.909216000 | -1.896862000 | -1.310028000 |
| O | 7.326485000  | -0.707597000 | -0.805325000 |
| O | -1.255771000 | 2.467391000  | -1.044464000 |
| N | 6.231599000  | -0.238033000 | -0.322562000 |
| N | -1.095408000 | 1.446272000  | 1.803862000  |
| N | -3.618251000 | 1.710403000  | 0.155203000  |
| N | 2.500018000  | 1.200902000  | 1.171701000  |
| H | 2.799303000  | 1.815090000  | 1.922653000  |
| N | -1.134079000 | -1.554014000 | 1.409786000  |
| N | -3.711931000 | -1.302455000 | -0.208005000 |
| N | -1.989298000 | 4.554393000  | -1.492926000 |
| H | -1.065783000 | 4.842672000  | -1.796129000 |
| H | -2.734265000 | 5.238757000  | -1.524254000 |
| N | -0.026098000 | -3.966373000 | -1.107650000 |
| H | -0.101730000 | -4.128729000 | -2.105595000 |
| H | 0.361355000  | -4.704748000 | -0.534102000 |
| C | 0.270879000  | 2.015544000  | 1.730959000  |
| H | 0.679118000  | 2.221666000  | 2.728083000  |
| H | 0.226727000  | 2.966752000  | 1.192115000  |
| C | 3.551995000  | 0.489833000  | 0.428626000  |
| H | 3.028247000  | -0.178369000 | -0.256119000 |
| C | 1.200862000  | 1.127141000  | 0.920880000  |
| C | -0.407528000 | -2.805472000 | -0.597927000 |
| C | -3.609588000 | 2.879646000  | -0.755562000 |
| H | -4.193135000 | 3.716982000  | -0.352282000 |
| H | -4.072717000 | 2.591248000  | -1.705246000 |
| C | -2.191900000 | 3.306218000  | -1.099025000 |
| C | 5.544083000  | 0.805422000  | -1.157053000 |
| C | 4.427767000  | -0.302328000 | 1.403219000  |
| H | 4.877733000  | 0.401019000  | 2.115941000  |
| H | 3.817227000  | -1.002984000 | 1.982834000  |
| C | 4.424927000  | 1.485876000  | -0.341456000 |
| H | 3.811243000  | 2.081665000  | -1.025691000 |
| H | 4.875489000  | 2.180768000  | 0.378813000  |
| C | 5.549109000  | -1.097706000 | 0.703314000  |

|   |              |              |              |
|---|--------------|--------------|--------------|
| C | -2.092062000 | 2.545159000  | 1.999141000  |
| H | -1.756366000 | 3.412563000  | 1.429737000  |
| H | -2.117840000 | 2.857219000  | 3.051558000  |
| C | -0.176390000 | -2.553902000 | 0.880860000  |
| H | -0.197373000 | -3.485847000 | 1.458808000  |
| H | 0.835941000  | -2.144878000 | 0.952954000  |
| C | -0.557876000 | -0.891621000 | 2.621392000  |
| H | 0.516008000  | -0.775460000 | 2.469583000  |
| H | -0.676772000 | -1.534914000 | 3.503040000  |
| C | 4.992486000  | 0.150002000  | -2.441624000 |
| H | 5.786768000  | -0.420842000 | -2.930815000 |
| H | 4.643692000  | 0.925114000  | -3.132294000 |
| H | 4.154918000  | -0.525419000 | -2.243300000 |
| C | 6.597814000  | 1.860224000  | -1.533986000 |
| H | 7.054898000  | 2.289618000  | -0.636211000 |
| H | 6.120059000  | 2.667100000  | -2.099267000 |
| H | 7.385291000  | 1.419049000  | -2.147974000 |
| C | -4.186311000 | -1.731415000 | -1.565557000 |
| C | 6.605905000  | -1.493479000 | 1.748156000  |
| H | 6.131378000  | -2.076593000 | 2.544202000  |
| H | 7.061469000  | -0.603513000 | 2.195016000  |
| H | 7.394091000  | -2.096093000 | 1.292806000  |
| C | -4.877783000 | 0.923132000  | -0.030338000 |
| H | -5.111800000 | 0.913759000  | -1.097028000 |
| H | -5.718390000 | 1.417718000  | 0.474106000  |
| C | -4.764450000 | -0.505644000 | 0.490378000  |
| H | -4.541770000 | -0.507253000 | 1.558323000  |
| H | -5.740594000 | -0.996000000 | 0.379346000  |
| C | 5.001320000  | -2.369893000 | 0.021177000  |
| H | 4.658431000  | -3.079240000 | 0.781860000  |
| H | 5.795924000  | -2.842627000 | -0.562879000 |
| H | 4.160656000  | -2.160274000 | -0.646871000 |
| C | -3.349609000 | -2.511289000 | 0.590364000  |
| H | -2.882239000 | -3.228353000 | -0.087013000 |
| H | -4.252696000 | -2.999611000 | 0.978717000  |
| C | -3.504188000 | 2.148128000  | 1.580587000  |
| H | -3.863606000 | 1.332979000  | 2.209621000  |
| H | -4.174623000 | 2.998649000  | 1.765549000  |
| C | -2.432962000 | -2.209274000 | 1.772871000  |
| H | -2.946571000 | -1.554905000 | 2.478605000  |
| H | -2.236010000 | -3.147082000 | 2.309084000  |
| C | -1.203925000 | 0.458518000  | 2.920562000  |
| H | -2.262643000 | 0.324780000  | 3.145944000  |
| H | -0.744122000 | 0.869564000  | 3.829888000  |
| O | -0.686414000 | 0.382230000  | -2.723343000 |
| H | -0.124917000 | 1.146826000  | -2.938776000 |
| H | -0.225070000 | -0.413236000 | -3.043064000 |
| C | -5.366658000 | -2.603401000 | -1.552624000 |
| C | -6.338016000 | -3.321779000 | -1.540794000 |
| H | -3.349359000 | -2.237911000 | -2.056304000 |
| H | -4.395885000 | -0.834835000 | -2.157443000 |
| H | -7.195242000 | -3.959115000 | -1.535737000 |

**-45°**

symmetry c1

|   |              |              |              |
|---|--------------|--------------|--------------|
| Y | -1.533509000 | 0.211234000  | -0.476935000 |
| O | 0.718655000  | 0.398047000  | 0.011064000  |
| O | -0.913559000 | -1.902157000 | -1.306067000 |
| O | 7.324330000  | -0.711394000 | -0.803350000 |
| O | -1.252648000 | 2.466547000  | -1.041441000 |
| N | 6.229769000  | -0.240084000 | -0.321558000 |
| N | -1.095691000 | 1.450093000  | 1.802474000  |
| N | -3.617809000 | 1.711725000  | 0.151477000  |
| N | 2.499264000  | 1.204545000  | 1.169947000  |
| H | 2.798705000  | 1.815706000  | 1.923311000  |
| N | -1.133388000 | -1.550364000 | 1.411431000  |
| N | -3.711976000 | -1.301192000 | -0.207077000 |
| N | -1.985850000 | 4.550498000  | -1.504309000 |
| H | -1.061712000 | 4.837463000  | -1.806750000 |
| H | -2.731078000 | 5.234242000  | -1.541430000 |
| N | -0.026744000 | -3.969872000 | -1.099737000 |
| H | -0.104223000 | -4.135355000 | -2.097044000 |
| H | 0.363123000  | -4.705947000 | -0.524845000 |
| C | 0.270477000  | 2.019962000  | 1.729752000  |
| H | 0.679032000  | 2.224595000  | 2.727022000  |
| H | 0.225710000  | 2.972044000  | 1.192548000  |
| C | 3.550849000  | 0.492214000  | 0.427387000  |
| H | 3.026694000  | -0.175240000 | -0.257790000 |
| C | 1.200347000  | 1.133600000  | 0.917606000  |
| C | -0.408872000 | -2.808298000 | -0.592615000 |
| C | -3.607426000 | 2.879418000  | -0.761366000 |
| H | -4.190517000 | 3.717975000  | -0.359917000 |
| H | -4.070099000 | 2.589816000  | -1.710875000 |
| C | -2.188811000 | 3.304298000  | -1.103801000 |
| C | 5.544374000  | 0.804144000  | -1.156856000 |
| C | 4.424583000  | -0.301124000 | 1.402872000  |
| H | 4.875027000  | 0.401705000  | 2.115804000  |
| H | 3.812441000  | -1.000706000 | 1.982086000  |
| C | 4.425925000  | 1.486789000  | -0.342085000 |
| H | 3.813772000  | 2.083565000  | -1.026821000 |
| H | 4.877241000  | 2.180951000  | 0.378408000  |
| C | 5.545312000  | -1.098384000 | 0.704140000  |
| C | -2.092980000 | 2.548807000  | 1.995990000  |
| H | -1.756977000 | 3.415945000  | 1.426461000  |
| H | -2.119911000 | 2.861376000  | 3.048223000  |
| C | -0.175602000 | -2.551368000 | 0.884797000  |
| H | -0.194981000 | -3.481233000 | 1.466127000  |
| H | 0.836537000  | -2.141251000 | 0.953997000  |
| C | -0.557292000 | -0.886309000 | 2.622313000  |
| H | 0.516466000  | -0.769315000 | 2.469763000  |
| H | -0.675191000 | -1.528992000 | 3.504510000  |
| C | 4.992389000  | 0.148975000  | -2.441373000 |
| H | 5.786019000  | -0.423421000 | -2.929808000 |

|   |              |              |              |
|---|--------------|--------------|--------------|
| H | 4.645229000  | 0.924275000  | -3.132651000 |
| H | 4.153624000  | -0.525007000 | -2.243172000 |
| C | 6.600040000  | 1.857028000  | -1.533711000 |
| H | 7.057355000  | 2.286070000  | -0.635886000 |
| H | 6.123934000  | 2.664428000  | -2.099628000 |
| H | 7.387116000  | 1.414243000  | -2.147057000 |
| C | -4.185565000 | -1.732401000 | -1.564263000 |
| C | 6.600732000  | -1.495236000 | 1.749973000  |
| H | 6.124757000  | -2.077348000 | 2.545887000  |
| H | 7.057231000  | -0.605746000 | 2.196820000  |
| H | 7.388390000  | -2.099181000 | 1.295475000  |
| C | -4.877561000 | 0.924704000  | -0.033697000 |
| H | -5.110913000 | 0.913775000  | -1.100520000 |
| H | -5.718275000 | 1.420428000  | 0.469432000  |
| C | -4.764978000 | -0.503313000 | 0.489334000  |
| H | -4.543089000 | -0.503368000 | 1.557470000  |
| H | -5.741118000 | -0.993663000 | 0.378299000  |
| C | 4.996151000  | -2.370088000 | 0.022204000  |
| H | 4.651652000  | -3.078540000 | 0.782995000  |
| H | 5.790466000  | -2.844305000 | -0.561036000 |
| H | 4.156281000  | -2.159535000 | -0.646544000 |
| C | -3.349863000 | -2.508624000 | 0.593614000  |
| H | -2.883320000 | -3.227369000 | -0.082470000 |
| H | -4.253014000 | -2.995623000 | 0.983477000  |
| C | -3.504639000 | 2.151223000  | 1.576417000  |
| H | -3.864734000 | 1.336860000  | 2.206100000  |
| H | -4.175184000 | 3.002014000  | 1.759758000  |
| C | -2.432639000 | -2.204962000 | 1.775353000  |
| H | -2.945975000 | -1.549543000 | 2.480292000  |
| H | -2.235682000 | -3.142039000 | 2.312803000  |
| C | -1.204445000 | 0.463561000  | 2.920143000  |
| H | -2.263240000 | 0.329383000  | 3.144873000  |
| H | -0.745537000 | 0.875736000  | 3.829380000  |
| O | -0.675976000 | 0.365688000  | -2.727053000 |
| H | -0.000179000 | 1.043589000  | -2.901549000 |
| H | -0.302569000 | -0.483018000 | -3.026268000 |
| C | -5.366311000 | -2.603792000 | -1.550537000 |
| C | -6.338091000 | -3.321588000 | -1.538054000 |
| H | -3.348494000 | -2.240098000 | -2.053509000 |
| H | -4.394379000 | -0.836727000 | -2.157810000 |
| H | -7.195675000 | -3.958438000 | -1.532439000 |

**-35°**

symmetry c1

|   |              |              |              |
|---|--------------|--------------|--------------|
| Y | -1.533751000 | 0.211198000  | -0.481586000 |
| O | 0.716545000  | 0.399900000  | 0.020591000  |
| O | -0.904201000 | -1.908745000 | -1.302939000 |
| O | 7.310567000  | -0.715488000 | -0.808294000 |
| O | -1.249682000 | 2.470449000  | -1.034235000 |
| N | 6.219094000  | -0.240456000 | -0.323149000 |
| N | -1.103913000 | 1.454287000  | 1.800273000  |

|   |              |              |              |
|---|--------------|--------------|--------------|
| N | -3.620903000 | 1.710819000  | 0.139195000  |
| N | 2.494529000  | 1.212232000  | 1.177657000  |
| H | 2.794177000  | 1.826041000  | 1.928741000  |
| N | -1.138829000 | -1.546865000 | 1.413222000  |
| N | -3.711446000 | -1.301324000 | -0.213692000 |
| N | -1.986599000 | 4.548634000  | -1.516727000 |
| H | -1.061222000 | 4.836881000  | -1.813977000 |
| H | -2.734038000 | 5.229247000  | -1.564336000 |
| N | -0.023740000 | -3.977895000 | -1.082375000 |
| H | -0.097335000 | -4.148441000 | -2.079112000 |
| H | 0.361690000  | -4.711978000 | -0.502013000 |
| C | 0.262225000  | 2.025304000  | 1.733074000  |
| H | 0.666460000  | 2.231146000  | 2.731864000  |
| H | 0.218860000  | 2.976716000  | 1.194597000  |
| C | 3.544832000  | 0.497309000  | 0.435496000  |
| H | 3.018845000  | -0.174345000 | -0.244105000 |
| C | 1.195628000  | 1.138796000  | 0.925543000  |
| C | -0.405435000 | -2.812905000 | -0.582818000 |
| C | -3.608151000 | 2.876484000  | -0.776052000 |
| H | -4.195434000 | 3.714600000  | -0.379706000 |
| H | -4.064784000 | 2.583759000  | -1.727499000 |
| C | -2.188112000 | 3.303951000  | -1.109952000 |
| C | 5.529957000  | 0.799565000  | -1.160619000 |
| C | 4.422955000  | -0.290529000 | 1.411355000  |
| H | 4.877449000  | 0.416025000  | 2.118006000  |
| H | 3.813530000  | -0.986620000 | 1.997585000  |
| C | 4.416379000  | 1.487564000  | -0.343460000 |
| H | 3.801080000  | 2.081114000  | -1.028185000 |
| H | 4.871938000  | 2.185109000  | 0.371014000  |
| C | 5.539537000  | -1.092431000 | 0.711102000  |
| C | -2.102715000 | 2.552486000  | 1.988252000  |
| H | -1.765076000 | 3.419244000  | 1.419277000  |
| H | -2.134284000 | 2.866102000  | 3.040057000  |
| C | -0.177832000 | -2.548762000 | 0.894101000  |
| H | -0.197458000 | -3.475714000 | 1.480081000  |
| H | 0.833322000  | -2.136373000 | 0.964337000  |
| C | -0.567976000 | -0.880233000 | 2.625351000  |
| H | 0.506262000  | -0.762671000 | 2.476865000  |
| H | -0.689023000 | -1.521738000 | 3.507959000  |
| C | 4.970666000  | 0.137637000  | -2.438579000 |
| H | 5.761519000  | -0.437240000 | -2.928601000 |
| H | 4.619493000  | 0.909317000  | -3.131857000 |
| H | 4.133279000  | -0.535512000 | -2.232184000 |
| C | 6.584309000  | 1.849334000  | -1.549465000 |
| H | 7.046919000  | 2.283383000  | -0.656806000 |
| H | 6.105738000  | 2.653649000  | -2.117701000 |
| H | 7.367619000  | 1.402181000  | -2.164485000 |
| C | -4.180786000 | -1.734440000 | -1.571805000 |
| C | 6.600283000  | -1.484116000 | 1.753460000  |
| H | 6.128182000  | -2.061479000 | 2.555115000  |
| H | 7.059720000  | -0.592449000 | 2.192887000  |
| H | 7.385134000  | -2.091090000 | 1.298132000  |

|   |              |              |              |
|---|--------------|--------------|--------------|
| C | -4.879893000 | 0.923255000  | -0.047793000 |
| H | -5.110681000 | 0.910293000  | -1.115150000 |
| H | -5.722057000 | 1.419545000  | 0.452344000  |
| C | -4.767695000 | -0.503657000 | 0.478198000  |
| H | -4.549263000 | -0.501607000 | 1.547045000  |
| H | -5.742811000 | -0.995439000 | 0.364898000  |
| C | 4.986068000  | -2.367662000 | 0.039284000  |
| H | 4.645005000  | -3.071510000 | 0.805891000  |
| H | 5.777114000  | -2.845681000 | -0.545296000 |
| H | 4.142943000  | -2.160482000 | -0.626433000 |
| C | -3.351623000 | -2.507642000 | 0.589682000  |
| H | -2.882159000 | -3.226990000 | -0.083715000 |
| H | -4.255918000 | -2.994552000 | 0.976956000  |
| C | -3.512317000 | 2.153026000  | 1.563766000  |
| H | -3.874096000 | 1.339531000  | 2.193544000  |
| H | -4.184143000 | 3.003666000  | 1.743150000  |
| C | -2.438879000 | -2.201350000 | 1.774005000  |
| H | -2.954927000 | -1.544708000 | 2.475771000  |
| H | -2.243349000 | -3.137182000 | 2.314122000  |
| C | -1.217049000 | 0.469569000  | 2.918634000  |
| H | -2.276667000 | 0.335345000  | 3.139402000  |
| H | -0.762004000 | 0.883020000  | 3.829248000  |
| O | -0.541564000 | 0.357707000  | -2.696682000 |
| H | 0.241235000  | 0.931213000  | -2.770869000 |
| H | -0.250138000 | -0.531270000 | -2.970561000 |
| C | -5.361638000 | -2.605726000 | -1.559768000 |
| C | -6.333434000 | -3.323496000 | -1.547108000 |
| H | -3.342292000 | -2.243373000 | -2.057381000 |
| H | -4.387468000 | -0.839703000 | -2.167493000 |
| H | -7.191069000 | -3.960284000 | -1.541233000 |

## -25°

symmetry c1

|   |              |              |              |
|---|--------------|--------------|--------------|
| Y | -1.533693000 | 0.211000000  | -0.484399000 |
| O | 0.716389000  | 0.408808000  | 0.015665000  |
| O | -0.909798000 | -1.917100000 | -1.297784000 |
| O | 7.307265000  | -0.717885000 | -0.807532000 |
| O | -1.249508000 | 2.471222000  | -1.036516000 |
| N | 6.216458000  | -0.241845000 | -0.321894000 |
| N | -1.105548000 | 1.457223000  | 1.798035000  |
| N | -3.621839000 | 1.712570000  | 0.134607000  |
| N | 2.493093000  | 1.213649000  | 1.179566000  |
| H | 2.792521000  | 1.824582000  | 1.933109000  |
| N | -1.140832000 | -1.544052000 | 1.414708000  |
| N | -3.712958000 | -1.299196000 | -0.214631000 |
| N | -1.985773000 | 4.548849000  | -1.522354000 |
| H | -1.060078000 | 4.836727000  | -1.818893000 |
| H | -2.733080000 | 5.229486000  | -1.571200000 |
| N | -0.028756000 | -3.985532000 | -1.071483000 |
| H | -0.104062000 | -4.159812000 | -2.067446000 |
| H | 0.358162000  | -4.717240000 | -0.489143000 |

|   |              |              |              |
|---|--------------|--------------|--------------|
| C | 0.260493000  | 2.028815000  | 1.732251000  |
| H | 0.663838000  | 2.234282000  | 2.731442000  |
| H | 0.217199000  | 2.980440000  | 1.194135000  |
| C | 3.543295000  | 0.498736000  | 0.437028000  |
| H | 3.017055000  | -0.171397000 | -0.243876000 |
| C | 1.194762000  | 1.143681000  | 0.924626000  |
| C | -0.409617000 | -2.818715000 | -0.575628000 |
| C | -3.608134000 | 2.877863000  | -0.781044000 |
| H | -4.195040000 | 3.716438000  | -0.385057000 |
| H | -4.064707000 | 2.585144000  | -1.732500000 |
| C | -2.187629000 | 3.304467000  | -1.114207000 |
| C | 5.529107000  | 0.800464000  | -1.157989000 |
| C | 4.419847000  | -0.291663000 | 1.412191000  |
| H | 4.875224000  | 0.413196000  | 2.119943000  |
| H | 3.809193000  | -0.987697000 | 1.997200000  |
| C | 4.416486000  | 1.489051000  | -0.340001000 |
| H | 3.802322000  | 2.084642000  | -1.023955000 |
| H | 4.872974000  | 2.184736000  | 0.375684000  |
| C | 5.535402000  | -1.094266000 | 0.711015000  |
| C | -2.104777000 | 2.555417000  | 1.983983000  |
| H | -1.766928000 | 3.421617000  | 1.414346000  |
| H | -2.137107000 | 2.870052000  | 3.035459000  |
| C | -0.180083000 | -2.548294000 | 0.899647000  |
| H | -0.199340000 | -3.472532000 | 1.489941000  |
| H | 0.831166000  | -2.135597000 | 0.967296000  |
| C | -0.570535000 | -0.875948000 | 2.626255000  |
| H | 0.503771000  | -0.758400000 | 2.477835000  |
| H | -0.691698000 | -1.516534000 | 3.509512000  |
| C | 4.968962000  | 0.141249000  | -2.436973000 |
| H | 5.758999000  | -0.434127000 | -2.927721000 |
| H | 4.619044000  | 0.914468000  | -3.129176000 |
| H | 4.130540000  | -0.530955000 | -2.231660000 |
| C | 6.585164000  | 1.849132000  | -1.545164000 |
| H | 7.048332000  | 2.281155000  | -0.651814000 |
| H | 6.107935000  | 2.655012000  | -2.112304000 |
| H | 7.367851000  | 1.401625000  | -2.160721000 |
| C | -4.180802000 | -1.733942000 | -1.572940000 |
| C | 6.595340000  | -1.489034000 | 1.753021000  |
| H | 6.122234000  | -2.066879000 | 2.553736000  |
| H | 7.056044000  | -0.598705000 | 2.193816000  |
| H | 7.379339000  | -2.096527000 | 1.296919000  |
| C | -4.881109000 | 0.925662000  | -0.052726000 |
| H | -5.110877000 | 0.911683000  | -1.120293000 |
| H | -5.723467000 | 1.422954000  | 0.446106000  |
| C | -4.770120000 | -0.500681000 | 0.474878000  |
| H | -4.553286000 | -0.497566000 | 1.544048000  |
| H | -5.745138000 | -0.992397000 | 0.360621000  |
| C | 4.980204000  | -2.367768000 | 0.037318000  |
| H | 4.637765000  | -3.072080000 | 0.802878000  |
| H | 5.770732000  | -2.846245000 | -0.547583000 |
| H | 4.137690000  | -2.158450000 | -0.628486000 |
| C | -3.354544000 | -2.504389000 | 0.591088000  |



|   |              |              |              |
|---|--------------|--------------|--------------|
| H | -2.885649000 | -3.225543000 | -0.080659000 |
| H | -4.259464000 | -2.989553000 | 0.979086000  |
| C | -3.513908000 | 2.155179000  | 1.559001000  |
| H | -3.875749000 | 1.341887000  | 2.188976000  |
| H | -4.186050000 | 3.005716000  | 1.737815000  |
| C | -2.442079000 | -2.196566000 | 1.775343000  |
| H | -2.958043000 | -1.538202000 | 2.475517000  |
| H | -2.247815000 | -3.131542000 | 2.317371000  |
| C | -1.219798000 | 0.474050000  | 2.917534000  |
| H | -2.279577000 | 0.340196000  | 3.137661000  |
| H | -0.765480000 | 0.888539000  | 3.828018000  |
| O | -0.482369000 | 0.345216000  | -2.690494000 |
| H | 0.378785000  | 0.798935000  | -2.680569000 |
| H | -0.288498000 | -0.567796000 | -2.973298000 |
| C | -5.362208000 | -2.604398000 | -1.561376000 |
| C | -6.334629000 | -3.321326000 | -1.549263000 |
| H | -3.341869000 | -2.244006000 | -2.056531000 |
| H | -4.386162000 | -0.839772000 | -2.169960000 |
| H | -7.192819000 | -3.957367000 | -1.543862000 |

### -15°

symmetry c1

|   |              |              |              |
|---|--------------|--------------|--------------|
| Y | -1.531340000 | 0.210675000  | -0.489794000 |
| O | 0.718682000  | 0.406177000  | 0.016484000  |
| O | -0.933867000 | -1.934678000 | -1.287254000 |
| O | 7.310641000  | -0.712950000 | -0.810500000 |
| O | -1.249490000 | 2.466656000  | -1.054539000 |
| N | 6.219436000  | -0.241232000 | -0.321562000 |
| N | -1.104776000 | 1.457628000  | 1.795851000  |
| N | -3.620926000 | 1.722687000  | 0.129861000  |
| N | 2.494726000  | 1.202599000  | 1.187435000  |
| H | 2.793840000  | 1.810897000  | 1.943304000  |
| N | -1.153366000 | -1.544127000 | 1.418860000  |
| N | -3.720731000 | -1.287994000 | -0.216254000 |
| N | -1.973630000 | 4.551963000  | -1.525418000 |
| H | -1.047371000 | 4.835359000  | -1.824474000 |
| H | -2.716588000 | 5.237836000  | -1.566878000 |
| N | -0.053904000 | -4.003041000 | -1.055165000 |
| H | -0.133520000 | -4.181998000 | -2.049956000 |
| H | 0.335171000  | -4.732088000 | -0.470993000 |
| C | 0.263357000  | 2.024260000  | 1.734572000  |
| H | 0.664378000  | 2.228009000  | 2.735038000  |
| H | 0.225233000  | 2.976452000  | 1.196889000  |
| C | 3.545653000  | 0.493111000  | 0.440612000  |
| H | 3.020077000  | -0.169737000 | -0.247924000 |
| C | 1.197089000  | 1.137215000  | 0.928965000  |
| C | -0.431450000 | -2.833313000 | -0.563441000 |
| C | -3.603611000 | 2.888209000  | -0.784937000 |
| H | -4.184359000 | 3.729918000  | -0.386442000 |
| H | -4.064995000 | 2.598857000  | -1.735089000 |
| C | -2.182002000 | 3.306723000  | -1.122835000 |

|   |              |              |              |
|---|--------------|--------------|--------------|
| C | 5.534676000  | 0.810817000  | -1.147441000 |
| C | 4.419726000  | -0.308302000 | 1.408953000  |
| H | 4.874604000  | 0.388488000  | 2.124905000  |
| H | 3.807446000  | -1.010047000 | 1.985409000  |
| C | 4.420929000  | 1.491095000  | -0.324284000 |
| H | 3.808331000  | 2.094284000  | -1.002928000 |
| H | 4.876438000  | 2.178986000  | 0.399564000  |
| C | 5.535739000  | -1.104302000 | 0.700787000  |
| C | -2.100327000 | 2.559866000  | 1.978069000  |
| H | -1.759259000 | 3.422984000  | 1.405597000  |
| H | -2.131502000 | 2.877772000  | 3.028603000  |
| C | -0.196763000 | -2.554869000 | 0.909241000  |
| H | -0.218321000 | -3.475355000 | 1.505426000  |
| H | 0.816032000  | -2.145100000 | 0.972447000  |
| C | -0.582248000 | -0.876502000 | 2.629810000  |
| H | 0.492922000  | -0.764166000 | 2.482996000  |
| H | -0.707840000 | -1.514649000 | 3.514256000  |
| C | 4.976407000  | 0.166523000  | -2.434760000 |
| H | 5.766751000  | -0.404286000 | -2.930315000 |
| H | 4.628727000  | 0.947845000  | -3.118994000 |
| H | 4.136689000  | -0.506853000 | -2.238494000 |
| C | 6.592217000  | 1.863157000  | -1.520540000 |
| H | 7.053850000  | 2.284620000  | -0.621346000 |
| H | 6.116568000  | 2.675830000  | -2.079247000 |
| H | 7.375853000  | 1.422303000  | -2.139659000 |
| C | -4.185082000 | -1.719485000 | -1.576793000 |
| C | 6.593661000  | -1.511670000 | 1.739943000  |
| H | 6.118836000  | -2.097931000 | 2.533488000  |
| H | 7.054648000  | -0.626781000 | 2.191225000  |
| H | 7.377653000  | -2.114867000 | 1.278158000  |
| C | -4.882809000 | 0.940409000  | -0.057437000 |
| H | -5.112573000 | 0.927088000  | -1.125016000 |
| H | -5.723602000 | 1.440551000  | 0.441278000  |
| C | -4.776795000 | -0.485957000 | 0.470369000  |
| H | -4.562204000 | -0.483208000 | 1.539985000  |
| H | -5.753076000 | -0.974841000 | 0.354303000  |
| C | 4.980691000  | -2.369813000 | 0.012039000  |
| H | 4.635790000  | -3.082084000 | 0.769041000  |
| H | 5.772044000  | -2.842728000 | -0.576263000 |
| H | 4.140028000  | -2.152403000 | -0.653445000 |
| C | -3.370806000 | -2.494177000 | 0.591215000  |
| H | -2.905016000 | -3.219173000 | -0.078315000 |
| H | -4.279279000 | -2.973356000 | 0.978421000  |
| C | -3.510826000 | 2.163730000  | 1.554130000  |
| H | -3.874578000 | 1.351333000  | 2.184113000  |
| H | -4.180147000 | 3.016286000  | 1.734214000  |
| C | -2.459190000 | -2.188843000 | 1.776926000  |
| H | -2.973451000 | -1.526544000 | 2.474578000  |
| H | -2.271212000 | -3.123835000 | 2.321173000  |
| C | -1.226104000 | 0.476811000  | 2.916746000  |
| H | -2.286977000 | 0.347705000  | 3.134077000  |
| H | -0.772641000 | 0.891179000  | 3.827689000  |

|   |              |              |              |
|---|--------------|--------------|--------------|
| O | -0.395090000 | 0.303403000  | -2.663548000 |
| H | 0.522851000  | 0.614187000  | -2.566204000 |
| H | -0.314917000 | -0.617485000 | -2.974888000 |
| C | -5.370793000 | -2.584071000 | -1.571762000 |
| C | -6.347166000 | -3.295691000 | -1.566443000 |
| H | -3.346354000 | -2.232716000 | -2.057294000 |
| H | -4.383789000 | -0.823599000 | -2.173631000 |
| H | -7.208777000 | -3.927099000 | -1.567020000 |

-5°

symmetry c1

|   |              |              |              |
|---|--------------|--------------|--------------|
| Y | -1.531678000 | 0.210177000  | -0.492801000 |
| O | 0.719319000  | 0.408860000  | 0.006683000  |
| O | -0.947026000 | -1.940820000 | -1.283633000 |
| O | 7.316292000  | -0.712352000 | -0.804989000 |
| O | -1.251694000 | 2.468774000  | -1.050822000 |
| N | 6.223526000  | -0.241276000 | -0.318949000 |
| N | -1.102983000 | 1.457698000  | 1.792795000  |
| N | -3.622500000 | 1.725094000  | 0.130055000  |
| N | 2.495201000  | 1.200925000  | 1.181601000  |
| H | 2.793454000  | 1.807510000  | 1.939226000  |
| N | -1.154723000 | -1.543104000 | 1.419522000  |
| N | -3.724355000 | -1.284489000 | -0.214178000 |
| N | -1.974082000 | 4.554446000  | -1.523209000 |
| H | -1.047444000 | 4.837293000  | -1.821532000 |
| H | -2.716826000 | 5.240448000  | -1.565926000 |
| N | -0.066717000 | -4.009221000 | -1.051898000 |
| H | -0.150621000 | -4.190139000 | -2.045949000 |
| H | 0.324413000  | -4.737230000 | -0.467857000 |
| C | 0.264968000  | 2.024457000  | 1.728050000  |
| H | 0.667857000  | 2.229350000  | 2.727496000  |
| H | 0.225525000  | 2.975939000  | 1.189251000  |
| C | 3.547433000  | 0.491384000  | 0.436680000  |
| H | 3.023497000  | -0.172381000 | -0.252267000 |
| C | 1.198046000  | 1.137503000  | 0.921486000  |
| C | -0.441898000 | -2.838151000 | -0.560877000 |
| C | -3.605271000 | 2.891337000  | -0.783559000 |
| H | -4.185745000 | 3.732902000  | -0.384241000 |
| H | -4.066878000 | 2.602930000  | -1.733893000 |
| C | -2.183385000 | 3.309224000  | -1.120554000 |
| C | 5.539736000  | 0.809617000  | -1.147133000 |
| C | 4.420093000  | -0.308541000 | 1.407536000  |
| H | 4.872845000  | 0.389335000  | 2.123788000  |
| H | 3.807151000  | -1.010234000 | 1.983345000  |
| C | 4.423556000  | 1.489521000  | -0.327050000 |
| H | 3.811982000  | 2.091739000  | -1.007471000 |
| H | 4.876843000  | 2.178273000  | 0.397367000  |
| C | 5.538284000  | -1.104160000 | 0.702502000  |
| C | -2.098301000 | 2.560097000  | 1.976402000  |
| H | -1.757882000 | 3.423451000  | 1.404029000  |
| H | -2.128005000 | 2.877452000  | 3.027135000  |

|   |              |              |              |
|---|--------------|--------------|--------------|
| C | -0.201765000 | -2.557391000 | 0.910461000  |
| H | -0.224749000 | -3.476583000 | 1.508658000  |
| H | 0.812364000  | -2.150497000 | 0.970868000  |
| C | -0.580240000 | -0.875377000 | 2.628524000  |
| H | 0.494713000  | -0.764112000 | 2.478879000  |
| H | -0.704174000 | -1.512699000 | 3.513833000  |
| C | 4.984880000  | 0.163923000  | -2.435200000 |
| H | 5.776663000  | -0.407031000 | -2.928284000 |
| H | 4.638526000  | 0.944435000  | -3.121018000 |
| H | 4.144946000  | -0.509603000 | -2.240280000 |
| C | 6.597221000  | 1.862650000  | -1.518445000 |
| H | 7.056381000  | 2.285055000  | -0.618423000 |
| H | 6.122192000  | 2.674585000  | -2.078748000 |
| H | 7.382688000  | 1.422089000  | -2.135441000 |
| C | -4.187443000 | -1.716995000 | -1.574846000 |
| C | 6.594125000  | -1.509860000 | 1.744451000  |
| H | 6.117953000  | -2.095926000 | 2.537333000  |
| H | 7.053295000  | -0.624235000 | 2.196159000  |
| H | 7.379711000  | -2.112729000 | 1.284965000  |
| C | -4.885324000 | 0.944569000  | -0.056654000 |
| H | -5.115435000 | 0.931598000  | -1.124191000 |
| H | -5.725437000 | 1.445616000  | 0.442380000  |
| C | -4.780739000 | -0.481868000 | 0.470978000  |
| H | -4.567199000 | -0.479115000 | 1.540811000  |
| H | -5.757168000 | -0.970235000 | 0.353929000  |
| C | 4.985644000  | -2.370560000 | 0.013483000  |
| H | 4.639702000  | -3.082589000 | 0.770239000  |
| H | 5.778575000  | -2.843259000 | -0.572854000 |
| H | 4.146172000  | -2.154175000 | -0.653850000 |
| C | -3.375610000 | -2.489681000 | 0.595297000  |
| H | -2.912131000 | -3.217137000 | -0.073042000 |
| H | -4.284518000 | -2.966211000 | 0.984758000  |
| C | -3.509599000 | 2.164437000  | 1.554402000  |
| H | -3.872357000 | 1.351554000  | 2.184323000  |
| H | -4.178322000 | 3.017034000  | 1.736788000  |
| C | -2.462148000 | -2.183466000 | 1.779562000  |
| H | -2.974435000 | -1.518426000 | 2.476024000  |
| H | -2.276198000 | -3.117672000 | 2.325900000  |
| C | -1.222123000 | 0.478711000  | 2.915493000  |
| H | -2.282544000 | 0.350828000  | 3.135728000  |
| H | -0.766013000 | 0.894042000  | 3.824660000  |
| O | -0.372522000 | 0.301846000  | -2.658505000 |
| H | 0.576929000  | 0.460910000  | -2.507214000 |
| H | -0.410350000 | -0.593206000 | -3.043712000 |
| C | -5.372816000 | -2.582045000 | -1.570342000 |
| C | -6.348795000 | -3.294216000 | -1.565552000 |
| H | -3.348022000 | -2.230045000 | -2.054253000 |
| H | -4.386127000 | -0.821391000 | -2.172164000 |
| H | -7.210056000 | -3.926097000 | -1.566634000 |

5°

symmetry c1

|   |              |              |              |
|---|--------------|--------------|--------------|
| Y | -1.531219000 | 0.209570000  | -0.497503000 |
| O | 0.719617000  | 0.404474000  | 0.000653000  |
| O | -0.955109000 | -1.943879000 | -1.281435000 |
| O | 7.322698000  | -0.709912000 | -0.799856000 |
| O | -1.256113000 | 2.473954000  | -1.042599000 |
| N | 6.228250000  | -0.239873000 | -0.316625000 |
| N | -1.101800000 | 1.455235000  | 1.791024000  |
| N | -3.625198000 | 1.725458000  | 0.132553000  |
| N | 2.495298000  | 1.198622000  | 1.175144000  |
| H | 2.792507000  | 1.806022000  | 1.932545000  |
| N | -1.155560000 | -1.543405000 | 1.420040000  |
| N | -3.726816000 | -1.282533000 | -0.212862000 |
| N | -1.979414000 | 4.559829000  | -1.513231000 |
| H | -1.052717000 | 4.843872000  | -1.810139000 |
| H | -2.723019000 | 5.244795000  | -1.557017000 |
| N | -0.077893000 | -4.013740000 | -1.050735000 |
| H | -0.164836000 | -4.195341000 | -2.044349000 |
| H | 0.313253000  | -4.741917000 | -0.466985000 |
| C | 0.265794000  | 2.022115000  | 1.721463000  |
| H | 0.671109000  | 2.229425000  | 2.719442000  |
| H | 0.224633000  | 2.972257000  | 1.180475000  |
| C | 3.549304000  | 0.489307000  | 0.432598000  |
| H | 3.027454000  | -0.176450000 | -0.256000000 |
| C | 1.198314000  | 1.134282000  | 0.914892000  |
| C | -0.449803000 | -2.841134000 | -0.559760000 |
| C | -3.609753000 | 2.893565000  | -0.778454000 |
| H | -4.191708000 | 3.733444000  | -0.377636000 |
| H | -4.070434000 | 2.606359000  | -1.729609000 |
| C | -2.188088000 | 3.313506000  | -1.112871000 |
| C | 5.544041000  | 0.808186000  | -1.148055000 |
| C | 4.421631000  | -0.307371000 | 1.406447000  |
| H | 4.871654000  | 0.392744000  | 2.122246000  |
| H | 3.808897000  | -1.009082000 | 1.982459000  |
| C | 4.425079000  | 1.487569000  | -0.331373000 |
| H | 3.813697000  | 2.087480000  | -1.014003000 |
| H | 4.875766000  | 2.178401000  | 0.392678000  |
| C | 5.542716000  | -1.102127000 | 0.705137000  |
| C | -2.097005000 | 2.557424000  | 1.977048000  |
| H | -1.757756000 | 3.421550000  | 1.405297000  |
| H | -2.125002000 | 2.873540000  | 3.028202000  |
| C | -0.205739000 | -2.560408000 | 0.910864000  |
| H | -0.230594000 | -3.479159000 | 1.509747000  |
| H | 0.809539000  | -2.156255000 | 0.969890000  |
| C | -0.578041000 | -0.876745000 | 2.627738000  |
| H | 0.496738000  | -0.766605000 | 2.475777000  |
| H | -0.700717000 | -1.513861000 | 3.513421000  |
| C | 4.992784000  | 0.158968000  | -2.435878000 |
| H | 5.786414000  | -0.411845000 | -2.926152000 |
| H | 4.646638000  | 0.937479000  | -3.124058000 |
| H | 4.153445000  | -0.515377000 | -2.241176000 |
| C | 6.600319000  | 1.862452000  | -1.519306000 |

|   |              |              |              |
|---|--------------|--------------|--------------|
| H | 7.056984000  | 2.287337000  | -0.619177000 |
| H | 6.124894000  | 2.672499000  | -2.081994000 |
| H | 7.387769000  | 1.422186000  | -2.133976000 |
| C | -4.188585000 | -1.715412000 | -1.573906000 |
| C | 6.597290000  | -1.503619000 | 1.750001000  |
| H | 6.120694000  | -2.089056000 | 2.543091000  |
| H | 7.053738000  | -0.616162000 | 2.200891000  |
| H | 7.385037000  | -2.105798000 | 1.293326000  |
| C | -4.888394000 | 0.946024000  | -0.054008000 |
| H | -5.119112000 | 0.934258000  | -1.121469000 |
| H | -5.728130000 | 1.446788000  | 0.446049000  |
| C | -4.783985000 | -0.480875000 | 0.471896000  |
| H | -4.571276000 | -0.478943000 | 1.541890000  |
| H | -5.760172000 | -0.969450000 | 0.353654000  |
| C | 4.993872000  | -2.370924000 | 0.017501000  |
| H | 4.647882000  | -3.082200000 | 0.774945000  |
| H | 5.788843000  | -2.843192000 | -0.566416000 |
| H | 4.155221000  | -2.157420000 | -0.651807000 |
| C | -3.378430000 | -2.487226000 | 0.597569000  |
| H | -2.916061000 | -3.215972000 | -0.070047000 |
| H | -4.287547000 | -2.962452000 | 0.988145000  |
| C | -3.509176000 | 2.161981000  | 1.557254000  |
| H | -3.870276000 | 1.347941000  | 2.186626000  |
| H | -4.177629000 | 3.014148000  | 1.742930000  |
| C | -2.464187000 | -2.180316000 | 1.781141000  |
| H | -2.975303000 | -1.513289000 | 2.476537000  |
| H | -2.280067000 | -3.113975000 | 2.329122000  |
| C | -1.217761000 | 0.477961000  | 2.915435000  |
| H | -2.277564000 | 0.351085000  | 3.139264000  |
| H | -0.758435000 | 0.894281000  | 3.822530000  |
| O | -0.357072000 | 0.317391000  | -2.656848000 |
| H | 0.602113000  | 0.314584000  | -2.484186000 |
| H | -0.515905000 | -0.504908000 | -3.155076000 |
| C | -5.372806000 | -2.582047000 | -1.570461000 |
| C | -6.347614000 | -3.295834000 | -1.566532000 |
| H | -3.348044000 | -2.227221000 | -2.052657000 |
| H | -4.388120000 | -0.819862000 | -2.171068000 |
| H | -7.207853000 | -3.929100000 | -1.568349000 |

## 15°

symmetry c1

|   |              |              |              |
|---|--------------|--------------|--------------|
| Y | -1.529252000 | 0.209582000  | -0.502997000 |
| O | 0.719971000  | 0.392931000  | 0.000838000  |
| O | -0.960786000 | -1.946248000 | -1.280560000 |
| O | 7.329058000  | -0.704948000 | -0.797158000 |
| O | -1.260244000 | 2.480281000  | -1.033287000 |
| N | 6.232810000  | -0.237302000 | -0.315690000 |
| N | -1.101055000 | 1.450633000  | 1.790600000  |
| N | -3.627490000 | 1.726580000  | 0.135212000  |
| N | 2.495530000  | 1.193682000  | 1.171524000  |
| H | 2.791881000  | 1.803925000  | 1.926979000  |

|   |              |              |              |
|---|--------------|--------------|--------------|
| N | -1.159202000 | -1.546452000 | 1.420371000  |
| N | -3.729594000 | -1.279786000 | -0.213494000 |
| N | -1.983521000 | 4.567260000  | -1.499664000 |
| H | -1.056439000 | 4.852798000  | -1.793837000 |
| H | -2.727445000 | 5.251920000  | -1.542369000 |
| N | -0.092420000 | -4.019933000 | -1.050932000 |
| H | -0.179790000 | -4.200635000 | -2.044631000 |
| H | 0.296579000  | -4.749495000 | -0.467520000 |
| C | 0.266478000  | 2.016730000  | 1.717280000  |
| H | 0.673487000  | 2.226829000  | 2.714026000  |
| H | 0.224724000  | 2.965187000  | 1.173410000  |
| C | 3.551174000  | 0.485479000  | 0.430396000  |
| H | 3.031160000  | -0.182773000 | -0.257170000 |
| C | 1.198513000  | 1.126550000  | 0.912289000  |
| C | -0.459232000 | -2.845494000 | -0.559541000 |
| C | -3.613629000 | 2.897579000  | -0.771772000 |
| H | -4.196852000 | 3.735438000  | -0.368465000 |
| H | -4.073466000 | 2.612922000  | -1.724097000 |
| C | -2.192084000 | 3.319521000  | -1.102976000 |
| C | 5.546148000  | 0.807247000  | -1.149533000 |
| C | 4.425231000  | -0.306905000 | 1.406173000  |
| H | 4.872726000  | 0.395966000  | 2.120876000  |
| H | 3.814212000  | -1.009228000 | 1.983263000  |
| C | 4.424586000  | 1.484785000  | -0.334956000 |
| H | 3.811860000  | 2.081615000  | -1.019089000 |
| H | 4.872709000  | 2.178277000  | 0.388144000  |
| C | 5.549066000  | -1.099672000 | 0.707145000  |
| C | -2.095657000 | 2.552933000  | 1.979370000  |
| H | -1.756844000 | 3.418124000  | 1.409105000  |
| H | -2.122403000 | 2.867009000  | 3.031169000  |
| C | -0.213690000 | -2.567099000 | 0.911248000  |
| H | -0.243022000 | -3.486245000 | 1.509417000  |
| H | 0.803381000  | -2.167675000 | 0.971085000  |
| C | -0.578568000 | -0.881631000 | 2.627030000  |
| H | 0.496176000  | -0.773543000 | 2.473313000  |
| H | -0.700954000 | -1.518563000 | 3.512975000  |
| C | 4.997674000  | 0.154116000  | -2.436560000 |
| H | 5.793125000  | -0.415753000 | -2.924977000 |
| H | 4.650284000  | 0.930400000  | -3.126617000 |
| H | 4.159741000  | -0.521800000 | -2.241225000 |
| C | 6.599606000  | 1.863968000  | -1.521865000 |
| H | 7.054334000  | 2.291768000  | -0.622133000 |
| H | 6.122235000  | 2.671641000  | -2.086318000 |
| H | 7.388813000  | 1.424955000  | -2.135168000 |
| C | -4.189442000 | -1.711804000 | -1.575497000 |
| C | 6.604063000  | -1.496136000 | 1.753515000  |
| H | 6.128609000  | -2.081520000 | 2.547327000  |
| H | 7.057507000  | -0.606489000 | 2.203147000  |
| H | 7.393978000  | -2.096775000 | 1.298564000  |
| C | -4.890970000 | 0.948581000  | -0.052717000 |
| H | -5.121254000 | 0.938661000  | -1.120335000 |
| H | -5.730748000 | 1.448907000  | 0.447847000  |

|   |              |              |              |
|---|--------------|--------------|--------------|
| C | -4.787666000 | -0.479068000 | 0.470617000  |
| H | -4.576602000 | -0.478725000 | 1.540928000  |
| H | -5.763729000 | -0.967383000 | 0.350165000  |
| C | 5.004318000  | -2.371197000 | 0.021341000  |
| H | 4.660080000  | -3.082288000 | 0.779761000  |
| H | 5.800970000  | -2.842033000 | -0.561444000 |
| H | 4.165314000  | -2.161199000 | -0.648663000 |
| C | -3.383400000 | -2.484800000 | 0.597255000  |
| H | -2.921465000 | -3.214506000 | -0.069570000 |
| H | -4.293521000 | -2.958662000 | 0.987154000  |
| C | -3.508747000 | 2.158753000  | 1.560718000  |
| H | -3.868795000 | 1.343126000  | 2.188629000  |
| H | -4.176573000 | 3.010616000  | 1.750347000  |
| C | -2.469889000 | -2.178140000 | 1.781373000  |
| H | -2.979973000 | -1.508325000 | 2.474807000  |
| H | -2.289462000 | -3.111289000 | 2.331583000  |
| C | -1.214997000 | 0.474142000  | 2.915857000  |
| H | -2.274372000 | 0.348990000  | 3.142724000  |
| H | -0.752470000 | 0.890412000  | 3.821357000  |
| O | -0.331918000 | 0.339050000  | -2.648151000 |
| H | 0.612899000  | 0.171121000  | -2.478167000 |
| H | -0.598931000 | -0.365748000 | -3.265102000 |
| C | -5.372730000 | -2.579734000 | -1.574363000 |
| C | -6.346497000 | -3.294959000 | -1.572187000 |
| H | -3.347736000 | -2.222193000 | -2.053732000 |
| H | -4.389284000 | -0.815785000 | -2.171875000 |
| H | -7.205829000 | -3.929448000 | -1.575527000 |

## 25°

symmetry c1

|   |              |              |              |
|---|--------------|--------------|--------------|
| Y | -1.526822000 | 0.210452000  | -0.505689000 |
| O | 0.719483000  | 0.380450000  | 0.006323000  |
| O | -0.954816000 | -1.945411000 | -1.279623000 |
| O | 7.331443000  | -0.699871000 | -0.797536000 |
| O | -1.264923000 | 2.485829000  | -1.026471000 |
| N | 6.234295000  | -0.233932000 | -0.316458000 |
| N | -1.101997000 | 1.447591000  | 1.791278000  |
| N | -3.629506000 | 1.724463000  | 0.136948000  |
| N | 2.494842000  | 1.191811000  | 1.169911000  |
| H | 2.790785000  | 1.806131000  | 1.922193000  |
| N | -1.159737000 | -1.548229000 | 1.421931000  |
| N | -3.727928000 | -1.280921000 | -0.214649000 |
| N | -1.990611000 | 4.573694000  | -1.485719000 |
| H | -1.063492000 | 4.862089000  | -1.776943000 |
| H | -2.735698000 | 5.257169000  | -1.526936000 |
| N | -0.092593000 | -4.021439000 | -1.048663000 |
| H | -0.178231000 | -4.201523000 | -2.042595000 |
| H | 0.292600000  | -4.752395000 | -0.464516000 |
| C | 0.265447000  | 2.013293000  | 1.715416000  |
| H | 0.673226000  | 2.226348000  | 2.711268000  |
| H | 0.223352000  | 2.960035000  | 1.168605000  |



|   |              |              |              |
|---|--------------|--------------|--------------|
| C | 3.551206000  | 0.484102000  | 0.429537000  |
| H | 3.031871000  | -0.186097000 | -0.256639000 |
| C | 1.197476000  | 1.120196000  | 0.912948000  |
| C | -0.457676000 | -2.845999000 | -0.557656000 |
| C | -3.618576000 | 2.897624000  | -0.767237000 |
| H | -4.205051000 | 3.732613000  | -0.362715000 |
| H | -4.076186000 | 2.613741000  | -1.720857000 |
| C | -2.197689000 | 3.323850000  | -1.094486000 |
| C | 5.545064000  | 0.807786000  | -1.151709000 |
| C | 4.427394000  | -0.304952000 | 1.406092000  |
| H | 4.873557000  | 0.399970000  | 2.119620000  |
| H | 3.818158000  | -1.007750000 | 1.984498000  |
| C | 4.422173000  | 1.483970000  | -0.337895000 |
| H | 3.807801000  | 2.078258000  | -1.022781000 |
| H | 4.868946000  | 2.179695000  | 0.383903000  |
| C | 5.552738000  | -1.096257000 | 0.707903000  |
| C | -2.096943000 | 2.549348000  | 1.981337000  |
| H | -1.758928000 | 3.415424000  | 1.412032000  |
| H | -2.123434000 | 2.862255000  | 3.033491000  |
| C | -0.214535000 | -2.569428000 | 0.913770000  |
| H | -0.246018000 | -3.489068000 | 1.511128000  |
| H | 0.802823000  | -2.171174000 | 0.975713000  |
| C | -0.579443000 | -0.884206000 | 2.628896000  |
| H | 0.495455000  | -0.776986000 | 2.475902000  |
| H | -0.702947000 | -1.521049000 | 3.514786000  |
| C | 4.997720000  | 0.151529000  | -2.437642000 |
| H | 5.794283000  | -0.417345000 | -2.925409000 |
| H | 4.648495000  | 0.926026000  | -3.128771000 |
| H | 4.161279000  | -0.525864000 | -2.241082000 |
| C | 6.596015000  | 1.866349000  | -1.525883000 |
| H | 7.050026000  | 2.296511000  | -0.626912000 |
| H | 6.116654000  | 2.672118000  | -2.091377000 |
| H | 7.386041000  | 1.428242000  | -2.138775000 |
| C | -4.185602000 | -1.712411000 | -1.577449000 |
| C | 6.608902000  | -1.488849000 | 1.754566000  |
| H | 6.134936000  | -2.074000000 | 2.549443000  |
| H | 7.060533000  | -0.597511000 | 2.202689000  |
| H | 7.400014000  | -2.088466000 | 1.300355000  |
| C | -4.892110000 | 0.945665000  | -0.052307000 |
| H | -5.121720000 | 0.936788000  | -1.120113000 |
| H | -5.732681000 | 1.444556000  | 0.448406000  |
| C | -4.787679000 | -0.482383000 | 0.469155000  |
| H | -4.577844000 | -0.482963000 | 1.539693000  |
| H | -5.763018000 | -0.971790000 | 0.347098000  |
| C | 5.010510000  | -2.369920000 | 0.024099000  |
| H | 4.668199000  | -3.080757000 | 0.783637000  |
| H | 5.807949000  | -2.839768000 | -0.558408000 |
| H | 4.170698000  | -2.162673000 | -0.645773000 |
| C | -3.381909000 | -2.486170000 | 0.595718000  |
| H | -2.918003000 | -3.214985000 | -0.070729000 |
| H | -4.292299000 | -2.961225000 | 0.983542000  |
| C | -3.510134000 | 2.154346000  | 1.563102000  |

|   |              |              |              |
|---|--------------|--------------|--------------|
| H | -3.868707000 | 1.337307000  | 2.190006000  |
| H | -4.178723000 | 3.005161000  | 1.754764000  |
| C | -2.470778000 | -2.179163000 | 1.781446000  |
| H | -2.981937000 | -1.508970000 | 2.473708000  |
| H | -2.291667000 | -3.112166000 | 2.332424000  |
| C | -1.214786000 | 0.471989000  | 2.917324000  |
| H | -2.273955000 | 0.347509000  | 3.145615000  |
| H | -0.751024000 | 0.888917000  | 3.821915000  |
| O | -0.330246000 | 0.356936000  | -2.649888000 |
| H | 0.581328000  | 0.033879000  | -2.534325000 |
| H | -0.703358000 | -0.197416000 | -3.358190000 |
| C | -5.367107000 | -2.582828000 | -1.578485000 |
| C | -6.339164000 | -3.300382000 | -1.577933000 |
| H | -3.342242000 | -2.220644000 | -2.055158000 |
| H | -4.386712000 | -0.816237000 | -2.173160000 |
| H | -7.197013000 | -3.936866000 | -1.582663000 |

### 35°

symmetry c1

|   |              |              |              |
|---|--------------|--------------|--------------|
| Y | -1.524605000 | 0.211735000  | -0.505378000 |
| O | 0.718839000  | 0.369432000  | 0.015767000  |
| O | -0.932216000 | -1.941208000 | -1.277527000 |
| O | 7.330450000  | -0.694417000 | -0.801791000 |
| O | -1.266378000 | 2.488865000  | -1.022608000 |
| N | 6.233308000  | -0.230167000 | -0.319039000 |
| N | -1.104365000 | 1.446199000  | 1.792713000  |
| N | -3.630290000 | 1.721333000  | 0.136638000  |
| N | 2.493924000  | 1.190729000  | 1.172292000  |
| H | 2.789923000  | 1.808581000  | 1.921638000  |
| N | -1.159261000 | -1.550280000 | 1.425294000  |
| N | -3.723905000 | -1.283449000 | -0.216921000 |
| N | -1.994641000 | 4.578115000  | -1.471998000 |
| H | -1.067297000 | 4.869882000  | -1.759198000 |
| H | -2.740988000 | 5.260325000  | -1.511730000 |
| N | -0.080789000 | -4.020959000 | -1.041706000 |
| H | -0.159839000 | -4.199672000 | -2.036428000 |
| H | 0.297375000  | -4.753999000 | -0.455597000 |
| C | 0.263827000  | 2.010161000  | 1.718143000  |
| H | 0.670700000  | 2.223427000  | 2.714357000  |
| H | 0.223441000  | 2.956570000  | 1.170619000  |
| C | 3.550286000  | 0.484469000  | 0.430658000  |
| H | 3.030755000  | -0.185214000 | -0.255847000 |
| C | 1.196150000  | 1.114878000  | 0.917806000  |
| C | -0.444664000 | -2.844433000 | -0.552246000 |
| C | -3.621006000 | 2.893904000  | -0.768367000 |
| H | -4.213544000 | 3.726235000  | -0.367372000 |
| H | -4.072568000 | 2.606907000  | -1.723945000 |
| C | -2.200512000 | 3.325610000  | -1.088887000 |
| C | 5.542447000  | 0.812155000  | -1.152152000 |
| C | 4.428135000  | -0.305221000 | 1.405196000  |
| H | 4.874457000  | 0.398962000  | 2.119345000  |

|   |              |              |              |
|---|--------------|--------------|--------------|
| H | 3.820050000  | -1.009378000 | 1.983170000  |
| C | 4.419575000  | 1.486068000  | -0.336444000 |
| H | 3.803890000  | 2.080484000  | -1.020039000 |
| H | 4.866290000  | 2.181455000  | 0.385737000  |
| C | 5.553374000  | -1.094611000 | 0.704636000  |
| C | -2.098990000 | 2.548309000  | 1.981830000  |
| H | -1.760282000 | 3.414533000  | 1.413234000  |
| H | -2.126589000 | 2.860983000  | 3.034036000  |
| C | -0.210666000 | -2.569978000 | 0.920831000  |
| H | -0.244341000 | -3.490351000 | 1.516952000  |
| H | 0.805949000  | -2.170843000 | 0.988399000  |
| C | -0.583743000 | -0.885081000 | 2.633797000  |
| H | 0.491689000  | -0.777893000 | 2.484921000  |
| H | -0.710674000 | -1.521031000 | 3.519866000  |
| C | 4.994643000  | 0.157361000  | -2.438629000 |
| H | 5.791335000  | -0.409924000 | -2.928031000 |
| H | 4.643989000  | 0.932621000  | -3.128190000 |
| H | 4.159036000  | -0.521128000 | -2.242367000 |
| C | 6.592115000  | 1.872257000  | -1.525622000 |
| H | 7.046420000  | 2.301562000  | -0.626389000 |
| H | 6.111516000  | 2.678381000  | -2.089560000 |
| H | 7.382076000  | 1.435821000  | -2.139792000 |
| C | -4.181039000 | -1.713179000 | -1.580479000 |
| C | 6.610939000  | -1.488113000 | 1.749521000  |
| H | 6.138239000  | -2.074848000 | 2.543982000  |
| H | 7.062424000  | -0.597162000 | 2.198561000  |
| H | 7.401990000  | -2.086443000 | 1.293501000  |
| C | -4.891845000 | 0.940936000  | -0.052302000 |
| H | -5.122453000 | 0.932710000  | -1.119892000 |
| H | -5.732711000 | 1.438181000  | 0.449528000  |
| C | -4.784857000 | -0.487395000 | 0.467930000  |
| H | -4.574818000 | -0.488466000 | 1.538416000  |
| H | -5.759339000 | -0.978442000 | 0.345595000  |
| C | 5.011469000  | -2.367565000 | 0.019246000  |
| H | 4.670444000  | -3.079935000 | 0.777923000  |
| H | 5.808714000  | -2.835825000 | -0.564812000 |
| H | 4.170863000  | -2.159876000 | -0.649496000 |
| C | -3.376600000 | -2.489852000 | 0.591174000  |
| H | -2.907978000 | -3.215061000 | -0.076038000 |
| H | -4.286769000 | -2.969020000 | 0.974423000  |
| C | -3.511955000 | 2.153020000  | 1.562491000  |
| H | -3.871008000 | 1.336508000  | 2.189821000  |
| H | -4.180858000 | 3.003877000  | 1.752702000  |
| C | -2.470119000 | -2.183307000 | 1.780416000  |
| H | -2.984291000 | -1.514621000 | 2.471919000  |
| H | -2.291665000 | -3.116833000 | 2.330751000  |
| C | -1.220044000 | 0.471180000  | 2.918920000  |
| H | -2.279810000 | 0.346559000  | 3.144297000  |
| H | -0.758982000 | 0.889000000  | 3.824514000  |
| O | -0.352769000 | 0.361625000  | -2.663941000 |
| H | 0.501682000  | -0.102693000 | -2.621215000 |
| H | -0.819920000 | -0.037704000 | -3.419245000 |

|   |              |              |              |
|---|--------------|--------------|--------------|
| C | -5.360673000 | -2.586071000 | -1.583223000 |
| C | -6.331204000 | -3.305675000 | -1.584144000 |
| H | -3.336560000 | -2.218654000 | -2.059397000 |
| H | -4.384091000 | -0.816322000 | -2.174436000 |
| H | -7.187772000 | -3.943877000 | -1.590142000 |

#### 45°

symmetry c1

|   |              |              |              |
|---|--------------|--------------|--------------|
| Y | -1.524205000 | 0.212613000  | -0.501861000 |
| O | 0.716889000  | 0.363269000  | 0.020193000  |
| O | -0.905202000 | -1.931801000 | -1.276993000 |
| O | 7.329240000  | -0.691521000 | -0.804705000 |
| O | -1.260410000 | 2.493887000  | -1.005777000 |
| N | 6.231877000  | -0.227121000 | -0.322584000 |
| N | -1.105772000 | 1.444954000  | 1.796374000  |
| N | -3.628043000 | 1.714965000  | 0.137860000  |
| N | 2.492596000  | 1.193549000  | 1.168952000  |
| H | 2.789119000  | 1.814288000  | 1.915662000  |
| N | -1.152895000 | -1.550987000 | 1.428172000  |
| N | -3.716771000 | -1.289596000 | -0.216942000 |
| N | -1.995735000 | 4.580940000  | -1.455002000 |
| H | -1.067644000 | 4.878245000  | -1.734068000 |
| H | -2.745119000 | 5.259616000  | -1.498159000 |
| N | -0.056699000 | -4.012474000 | -1.039975000 |
| H | -0.128668000 | -4.188541000 | -2.035710000 |
| H | 0.316522000  | -4.747400000 | -0.453032000 |
| C | 0.262459000  | 2.008587000  | 1.720088000  |
| H | 0.670910000  | 2.221169000  | 2.715839000  |
| H | 0.221373000  | 2.955266000  | 1.173199000  |
| C | 3.548548000  | 0.485926000  | 0.428156000  |
| H | 3.028670000  | -0.187940000 | -0.253966000 |
| C | 1.194205000  | 1.113308000  | 0.918336000  |
| C | -0.423494000 | -2.837130000 | -0.550062000 |
| C | -3.619001000 | 2.885692000  | -0.769931000 |
| H | -4.221417000 | 3.714437000  | -0.376575000 |
| H | -4.059413000 | 2.592885000  | -1.728948000 |
| C | -2.198242000 | 3.326214000  | -1.077582000 |
| C | 5.537314000  | 0.809328000  | -1.159966000 |
| C | 4.429796000  | -0.297061000 | 1.405024000  |
| H | 4.875757000  | 0.411720000  | 2.114881000  |
| H | 3.824194000  | -0.999546000 | 1.987629000  |
| C | 4.414453000  | 1.485181000  | -0.345759000 |
| H | 3.796326000  | 2.074779000  | -1.031337000 |
| H | 4.861047000  | 2.185157000  | 0.372039000  |
| C | 5.555571000  | -1.087609000 | 0.706784000  |
| C | -2.101014000 | 2.546330000  | 1.985801000  |
| H | -1.761924000 | 3.414090000  | 1.419948000  |
| H | -2.131026000 | 2.856852000  | 3.038573000  |
| C | -0.199308000 | -2.566779000 | 0.925170000  |
| H | -0.233502000 | -3.488953000 | 1.518409000  |
| H | 0.815909000  | -2.165294000 | 0.998898000  |

|   |              |              |              |
|---|--------------|--------------|--------------|
| C | -0.581842000 | -0.884718000 | 2.638335000  |
| H | 0.493675000  | -0.775097000 | 2.492079000  |
| H | -0.709500000 | -1.521193000 | 3.523908000  |
| C | 4.988751000  | 0.146565000  | -2.442076000 |
| H | 5.786040000  | -0.421032000 | -2.930150000 |
| H | 4.634730000  | 0.917392000  | -3.134859000 |
| H | 4.155372000  | -0.533151000 | -2.240882000 |
| C | 6.584095000  | 1.869594000  | -1.540956000 |
| H | 7.039025000  | 2.304760000  | -0.644867000 |
| H | 6.100861000  | 2.671606000  | -2.108499000 |
| H | 7.373933000  | 1.431461000  | -2.154083000 |
| C | -4.175215000 | -1.719879000 | -1.579971000 |
| C | 6.615693000  | -1.473163000 | 1.752071000  |
| H | 6.145521000  | -2.056585000 | 2.550464000  |
| H | 7.065887000  | -0.578784000 | 2.195582000  |
| H | 7.407390000  | -2.072197000 | 1.298108000  |
| C | -4.888499000 | 0.932465000  | -0.050966000 |
| H | -5.119705000 | 0.924077000  | -1.118417000 |
| H | -5.729857000 | 1.428424000  | 0.451194000  |
| C | -4.778694000 | -0.495788000 | 0.469343000  |
| H | -4.567649000 | -0.496515000 | 1.539615000  |
| H | -5.752310000 | -0.988704000 | 0.347810000  |
| C | 5.015259000  | -2.365312000 | 0.029067000  |
| H | 4.677468000  | -3.074567000 | 0.792118000  |
| H | 5.812413000  | -2.834695000 | -0.554218000 |
| H | 4.172715000  | -2.163004000 | -0.638927000 |
| C | -3.365221000 | -2.496225000 | 0.589291000  |
| H | -2.891925000 | -3.217385000 | -0.079197000 |
| H | -4.273865000 | -2.980553000 | 0.969588000  |
| C | -3.512946000 | 2.150141000  | 1.563333000  |
| H | -3.873154000 | 1.334468000  | 2.191124000  |
| H | -4.182868000 | 3.000910000  | 1.749949000  |
| C | -2.461895000 | -2.189020000 | 1.780636000  |
| H | -2.979189000 | -1.523227000 | 2.472642000  |
| H | -2.281352000 | -3.123029000 | 2.329452000  |
| C | -1.221245000 | 0.470141000  | 2.922482000  |
| H | -2.281110000 | 0.343687000  | 3.146570000  |
| H | -0.762082000 | 0.888962000  | 3.828621000  |
| O | -0.442569000 | 0.378687000  | -2.707034000 |
| H | 0.334390000  | -0.202959000 | -2.777986000 |
| H | -0.996273000 | 0.163686000  | -3.478160000 |
| C | -5.351390000 | -2.597381000 | -1.580480000 |
| C | -6.318769000 | -3.321203000 | -1.578838000 |
| H | -3.329896000 | -2.221917000 | -2.061188000 |
| H | -4.382906000 | -0.823539000 | -2.172973000 |
| H | -7.172630000 | -3.963050000 | -1.582557000 |

55°

symmetry c1

|   |              |             |              |
|---|--------------|-------------|--------------|
| Y | -1.523406000 | 0.213314000 | -0.500898000 |
| O | 0.716959000  | 0.346443000 | 0.036947000  |

|   |              |              |              |
|---|--------------|--------------|--------------|
| O | -0.879319000 | -1.920110000 | -1.282770000 |
| O | 7.326777000  | -0.685535000 | -0.812758000 |
| O | -1.263050000 | 2.496421000  | -1.001111000 |
| N | 6.230263000  | -0.221956000 | -0.327888000 |
| N | -1.108135000 | 1.440885000  | 1.799358000  |
| N | -3.629054000 | 1.708689000  | 0.140236000  |
| N | 2.492502000  | 1.194159000  | 1.172653000  |
| H | 2.789260000  | 1.821806000  | 1.913426000  |
| N | -1.150250000 | -1.555567000 | 1.426831000  |
| N | -3.712061000 | -1.295657000 | -0.220290000 |
| N | -2.004276000 | 4.583429000  | -1.441317000 |
| H | -1.076543000 | 4.885142000  | -1.716924000 |
| H | -2.755647000 | 5.260081000  | -1.481993000 |
| N | -0.035262000 | -4.002572000 | -1.047574000 |
| H | -0.099290000 | -4.173945000 | -2.044677000 |
| H | 0.331411000  | -4.741034000 | -0.460901000 |
| C | 0.260351000  | 2.003977000  | 1.724838000  |
| H | 0.667071000  | 2.218364000  | 2.720994000  |
| H | 0.220432000  | 2.949682000  | 1.176133000  |
| C | 3.548186000  | 0.486507000  | 0.431590000  |
| H | 3.027938000  | -0.192593000 | -0.244979000 |
| C | 1.193379000  | 1.106127000  | 0.926958000  |
| C | -0.404987000 | -2.829284000 | -0.555187000 |
| C | -3.623095000 | 2.878755000  | -0.768526000 |
| H | -4.232074000 | 3.704268000  | -0.378717000 |
| H | -4.057575000 | 2.582321000  | -1.729151000 |
| C | -2.203511000 | 3.326318000  | -1.070657000 |
| C | 5.528844000  | 0.808332000  | -1.167162000 |
| C | 4.436235000  | -0.288736000 | 1.408382000  |
| H | 4.883251000  | 0.424882000  | 2.112734000  |
| H | 3.835551000  | -0.990239000 | 1.997228000  |
| C | 4.407498000  | 1.484597000  | -0.351132000 |
| H | 3.784398000  | 2.068879000  | -1.036782000 |
| H | 4.855080000  | 2.189411000  | 0.361280000  |
| C | 5.561152000  | -1.079350000 | 0.708811000  |
| C | -2.103411000 | 2.541968000  | 1.989332000  |
| H | -1.764028000 | 3.410466000  | 1.424773000  |
| H | -2.134451000 | 2.851445000  | 3.042403000  |
| C | -0.191874000 | -2.566434000 | 0.923058000  |
| H | -0.227125000 | -3.491990000 | 1.510896000  |
| H | 0.821949000  | -2.163089000 | 1.004500000  |
| C | -0.584050000 | -0.889916000 | 2.639752000  |
| H | 0.491826000  | -0.779455000 | 2.497854000  |
| H | -0.714712000 | -1.527280000 | 3.524240000  |
| C | 4.976650000  | 0.137853000  | -2.443751000 |
| H | 5.773712000  | -0.428816000 | -2.933273000 |
| H | 4.616344000  | 0.904317000  | -3.138120000 |
| H | 4.146925000  | -0.544171000 | -2.235625000 |
| C | 6.570659000  | 1.869863000  | -1.558082000 |
| H | 7.028201000  | 2.310994000  | -0.666261000 |
| H | 6.082475000  | 2.667465000  | -2.127609000 |
| H | 7.359108000  | 1.431007000  | -2.172490000 |

|   |              |              |              |
|---|--------------|--------------|--------------|
| C | -4.173368000 | -1.722816000 | -1.583306000 |
| C | 6.627191000  | -1.456702000 | 1.751068000  |
| H | 6.162355000  | -2.037542000 | 2.554446000  |
| H | 7.076755000  | -0.558838000 | 2.188146000  |
| H | 7.418597000  | -2.055619000 | 1.296440000  |
| C | -4.887960000 | 0.923455000  | -0.047681000 |
| H | -5.121225000 | 0.916137000  | -1.114673000 |
| H | -5.729531000 | 1.416761000  | 0.456682000  |
| C | -4.773790000 | -0.505278000 | 0.470359000  |
| H | -4.559984000 | -0.507173000 | 1.540063000  |
| H | -5.746640000 | -1.000148000 | 0.350612000  |
| C | 5.021619000  | -2.361865000 | 0.039647000  |
| H | 4.689354000  | -3.068507000 | 0.807553000  |
| H | 5.817602000  | -2.831594000 | -0.544969000 |
| H | 4.175467000  | -2.165311000 | -0.625540000 |
| C | -3.356983000 | -2.504435000 | 0.581182000  |
| H | -2.878970000 | -3.220208000 | -0.089959000 |
| H | -4.264340000 | -2.994551000 | 0.957107000  |
| C | -3.515050000 | 2.145577000  | 1.565549000  |
| H | -3.875684000 | 1.330231000  | 2.193550000  |
| H | -4.185410000 | 2.996253000  | 1.750737000  |
| C | -2.457238000 | -2.199001000 | 1.775421000  |
| H | -2.977647000 | -1.537109000 | 2.468887000  |
| H | -2.274903000 | -3.134429000 | 2.321250000  |
| C | -1.225242000 | 0.464203000  | 2.923634000  |
| H | -2.285529000 | 0.336470000  | 3.145088000  |
| H | -0.768537000 | 0.882248000  | 3.831435000  |
| O | -0.479262000 | 0.395855000  | -2.700447000 |
| H | 0.199243000  | -0.276030000 | -2.885137000 |
| H | -1.011192000 | 0.478912000  | -3.510298000 |
| C | -5.348050000 | -2.602389000 | -1.582656000 |
| C | -6.313875000 | -3.328273000 | -1.579011000 |
| H | -3.328819000 | -2.222604000 | -2.068334000 |
| H | -4.383784000 | -0.825412000 | -2.173603000 |
| H | -7.166417000 | -3.971891000 | -1.580924000 |
